# Supplementary material
Source: MDPI journal article supplement (https://www.mdpi.com/2076-3417/11/16/7403)
Supplement: s1 [file s1]

| State | % Population |        | Total Deaths |         | % Deaths |        | Total YPLL            |                   | % YPLL        |               |
|-------|--------------|--------|--------------|---------|----------|--------|-----------------------|-------------------|---------------|---------------|
|       | Male         | Female | Male         | Female  | Male     | Female | Male                  | Female            | Male          | Female        |
| US    | 49.2%        | 50.8%  | 292,402      | 240,889 | 54.8%    | 45.2%  | 1,741,317 – 1,745,559 | 977,972 – 981,179 | 64.0% – 64.1% | 35.9% – 36.0% |
| AL    | 48.3%        | 51.7%  | 5,383        | 4,669   | 53.6%    | 46.4%  | 33,004 – 33,727       | 24,366 – 24,977   | 57.0% – 57.9% | 42.1% – 42.9% |
| AK    | 52.1%        | 47.9%  | 181          | 125     | 59.2%    | 40.8%  | 1,058 – 1,321         | 867 – 1,244       | 46.6% – 59.8% | 40.2% – 53.4% |
| AZ    | 49.7%        | 50.3%  | 8,925        | 6,245   | 58.8%    | 41.2%  | 62,384 – 63,134       | 36,474 – 37,086   | 62.8% – 63.3% | 36.7% – 37.2% |
| AR    | 49.1%        | 50.9%  | 2,985        | 2,765   | 51.9%    | 48.1%  | 15,927 – 16,322       | 11,275 – 11,687   | 57.8% – 59.0% | 41.0% – 42.1% |
| CA    | 49.7%        | 50.3%  | 35,500       | 24,710  | 59.0%    | 41.0%  | 274,859 – 276,443     | 126,535 – 127,684 | 68.3% – 68.6% | 31.4% – 31.7% |
| CO    | 50.4%        | 49.6%  | 3,468        | 2,770   | 55.6%    | 44.4%  | 18,793 – 19,282       | 8,516 – 8,815     | 68.2% – 69.2% | 30.8% – 31.8% |
| CT    | 48.8%        | 51.2%  | 3,729        | 3,909   | 48.8%    | 51.2%  | 15,695 – 16,127       | 9,110 – 9,711     | 62.0% – 63.7% | 36.3% – 38.0% |
| DE    | 48.3%        | 51.7%  | 699          | 698     | 50.0%    | 50.0%  | 3,443 – 4,033         | 2,637 – 2,963     | 54.2% – 60.1% | 40.0% – 45.9% |
| DC    | 47.4%        | 52.6%  | 762          | 560     | 57.6%    | 42.4%  | 7,264 – 7,808         | 3,517 – 3,862     | 65.5% – 68.7% | 31.2% – 34.5% |
| FL    | 48.9%        | 51.1%  | 17,585       | 13,304  | 56.9%    | 43.1%  | 90,952 – 91,920       | 53,172 – 53,988   | 62.8% – 63.3% | 36.7% – 37.2% |
| GA    | 48.6%        | 51.4%  | 8,706        | 7,434   | 53.9%    | 46.1%  | 56,651 – 57,451       | 38,975 – 39,636   | 59.0% – 59.5% | 40.5% – 41.0% |
| HI    | 50.0%        | 50.0%  | 270          | 168     | 61.6%    | 38.4%  | 1,985 – 2,287         | 1,046 – 1,440     | 58.5% – 68.0% | 31.9% – 41.7% |
| ID    | 50.1%        | 49.9%  | 1,143        | 808     | 58.6%    | 41.4%  | 4,332 – 4,630         | 2,623 – 2,796     | 61.1% – 63.5% | 36.5% – 38.8% |
| IL    | 49.1%        | 50.9%  | 11,124       | 9,298   | 54.5%    | 45.5%  | 64,555 – 65,350       | 33,506 – 34,120   | 65.5% – 66.0% | 34.0% – 34.5% |
| IN    | 49.3%        | 50.7%  | 6,144        | 5,751   | 51.7%    | 48.3%  | 26,284 – 26,929       | 17,033 – 17,567   | 60.1% – 61.0% | 38.9% – 40.0% |
| IA    | 49.8%        | 50.2%  | 3,020        | 2,798   | 51.9%    | 48.1%  | 11,319 – 11,683       | 7,306 – 7,692     | 59.7% – 61.3% | 38.7% – 40.2% |
| KA    | 49.8%        | 50.2%  | 2,563        | 2,177   | 54.1%    | 45.9%  | 11,850 – 12,205       | 7,309 – 7,734     | 60.7% – 62.4% | 37.6% – 39.3% |
| KY    | 49.3%        | 50.7%  | 3,393        | 3,343   | 50.4%    | 49.6%  | 16,108 – 16,752       | 10,944 – 11,300   | 59.0% – 60.3% | 39.7% – 41.1% |
| LA    | 48.8%        | 51.2%  | 4,868        | 4,119   | 54.2%    | 45.8%  | 30,379 – 30,969       | 21,180 – 21,801   | 58.4% – 59.2% | 40.7% – 41.6% |
| ME    | 49.0%        | 51.0%  | 396          | 429     | 48.0%    | 52.0%  | 1,467 – 1,658         | 740 – 899         | 62.8% – 68.4% | 31.6% – 37.2% |
| MD    | 48.4%        | 51.6%  | 4,775        | 4,421   | 51.9%    | 48.1%  | 28,946 – 29,632       | 16,700 – 17,159   | 63.0% – 63.8% | 36.2% – 37.1% |
| MA    | 48.5%        | 51.5%  | 6,349        | 6,471   | 49.5%    | 50.5%  | 23,533 – 24,202       | 13,030 – 13,472   | 63.8% – 64.8% | 35.2% – 36.3% |
| MI    | 49.3%        | 50.7%  | 7,966        | 6,865   | 53.7%    | 46.3%  | 41,166 – 41,820       | 24,930 – 25,525   | 61.8% – 62.5% | 37.5% – 38.1% |
| MN    | 49.8%        | 50.2%  | 3,634        | 3,401   | 51.7%    | 48.3%  | 13,054 – 13,433       | 7,805 – 8,388     | 61.0% – 63.0% | 37.0% – 39.0% |
| MS    | 48.5%        | 51.5%  | 3,701        | 3,363   | 52.4%    | 47.6%  | 23,223 – 23,788       | 19,461 – 19,875   | 54.1% – 54.8% | 45.1% – 46.0% |
| MO    | 49.1%        | 50.9%  | 5,416        | 4,945   | 52.3%    | 47.7%  | 24,381 – 24,991       | 15,590 – 16,161   | 60.3% – 61.4% | 38.6% – 39.7% |
| MT    | 50.3%        | 49.7%  | 863          | 682     | 55.9%    | 44.1%  | 3,999 – 4,211         | 2,679 – 2,849     | 58.8% – 60.8% | 39.3% – 41.3% |
| NE    | 50.0%        | 50.0%  | 1,557        | 1,189   | 56.7%    | 43.3%  | 7,253 – 7,553         | 3,836 – 4,112     | 64.1% – 66.0% | 34.0% – 35.9% |
| NV    | 50.2%        | 49.8%  | 3,332        | 1,990   | 62.6%    | 37.4%  | 23,858 – 24,417       | 11,227 – 11,652   | 67.3% – 68.3% | 31.7% – 32.7% |
| NH    | 49.6%        | 50.4%  | 628          | 617     | 50.4%    | 49.6%  | 1,857 – 2,137         | 617 – 726         | 72.6% – 77.1% | 23.0% – 27.5% |
| NJ    | 48.9%        | 51.1%  | 12,297       | 10,181  | 54.7%    | 45.3%  | 79,426 – 80,326       | 37,272 – 38,091   | 67.7% – 68.2% | 31.8% – 32.3% |
| NM    | 49.5%        | 50.5%  | 2,079        | 1,682   | 55.3%    | 44.7%  | 17,228 – 17,648       | 10,995 – 11,307   | 60.5% – 61.5% | 38.6% – 39.5% |
| NY    | 48.6%        | 51.4%  | 28,115       | 22,372  | 55.7%    | 44.3%  | 181,560 – 182,990     | 86,418 – 87,571   | 67.5% – 67.9% | 32.1% – 32.5% |
| NC    | 48.6%        | 51.4%  | 3,265        | 3,113   | 51.2%    | 48.8%  | 19,564 – 20,095       | 11,528 – 11,885   | 62.4% – 63.3% | 36.6% – 37.6% |
| ND    | 51.2%        | 48.8%  | 909          | 726     | 55.6%    | 44.4%  | 3,971 – 4,240         | 1,780 – 2,060     | 66.3% – 70.2% | 29.9% – 33.8% |
| OH    | 49.0%        | 51.0%  | 10,895       | 9,943   | 52.3%    | 47.7%  | 43,367 – 44,179       | 28,293 – 29,059   | 60.0% – 60.9% | 39.1% – 40.0% |
| OK    | 49.5%        | 50.5%  | 4,295        | 3,578   | 54.6%    | 45.4%  | 23,875 – 24,514       | 16,204 – 16,690   | 59.0% – 60.0% | 40.0% – 41.0% |
| OR    | 49.6%        | 50.4%  | 1,173        | 1,029   | 53.3%    | 46.7%  | 6,013 – 6,319         | 3,041 – 3,237     | 65.4% – 67.2% | 32.8% – 34.7% |
| PA    | 49.0%        | 51.0%  | 12,964       | 12,635  | 50.6%    | 49.4%  | 54,222 – 54,981       | 30,703 – 31,304   | 63.5% – 64.1% | 35.9% – 36.5% |
| RI    | 48.7%        | 51.3%  | 1,216        | 1,313   | 48.1%    | 51.9%  | 4,696 – 4,933         | 2,677 – 3,083     | 60.8% – 64.4% | 35.6% – 39.3% |
| SC    | 48.4%        | 51.6%  | 4,397        | 3,738   | 54.1%    | 45.9%  | 23,763 – 24,441       | 16,483 – 16,943   | 58.5% – 59.5% | 40.4% – 41.4% |
| SD    | 50.5%        | 49.5%  | 1,068        | 918     | 53.8%    | 46.2%  | 4,567 – 4,781         | 3,165 – 3,518     | 56.8% – 59.8% | 40.2% – 43.1% |
| TN    | 48.8%        | 51.2%  | 6,481        | 5,362   | 54.7%    | 45.3%  | 36,766 – 37,538       | 24,687 – 25,278   | 59.4% – 60.2% | 39.8% – 40.6% |
| TX    | 49.7%        | 50.3%  | 29,171       | 21,163  | 58.0%    | 42.0%  | 225,693 – 227,235     | 125,188 – 126,369 | 64.2% – 64.4% | 35.6% – 35.8% |
| UT    | 50.4%        | 49.6%  | 1,359        | 898     | 60.2%    | 39.8%  | 8,876 – 9,236         | 4,828 – 5,044     | 64.1% – 65.4% | 34.6% – 35.9% |
| VT    | 49.4%        | 50.6%  | 104          | 105     | 49.8%    | 50.2%  | 354 – 577             | 181 – 330         | 52.8% – 75.6% | 24.7% – 47.1% |
| VA    | 49.2%        | 50.8%  | 5,102        | 4,778   | 51.6%    | 48.4%  | 25,855 – 26,491       | 15,985 – 16,419   | 61.3% – 62.2% | 37.7% – 38.7% |
| WA    | 50.1%        | 49.9%  | 2,658        | 2,215   | 54.5%    | 45.5%  | 13,484 – 13,872       | 7,512 – 7,966     | 63.1% – 64.6% | 35.3% – 36.9% |
| WV    | 49.5%        | 50.5%  | 1,320        | 1,195   | 52.5%    | 47.5%  | 5,347 – 5,761         | 4,038 – 4,264     | 56.0% – 58.5% | 41.5% – 44.0% |
| WI    | 49.8%        | 50.2%  | 4,155        | 3,620   | 53.4%    | 46.6%  | 16,725 – 17,257       | 9,840 – 10,170    | 62.4% – 63.5% | 36.5% – 37.6% |
| WY    | 50.9%        | 49.1%  | 314          | 301     | 51.1%    | 48.9%  | 1,527 – 1,734         | 1,107 – 1,373     | 53.3% – 60.4% | 39.5% – 46.7% |

**Table S1:** Percentages of total population by sex, total COVID-19 deaths by sex, percentages of total COVID-19 deaths by sex, conservative 95% interval estimates of total YPLL by sex, and conservative 95% interval estimates of the percentage of total YPLL by sex in the U.S. and in each state and D.C. Quantities calculated with respect to cumulative COVID-19 deaths according to data from the National Center for Health Statistics as of 31 March 2021. The upper reference age used to define YPLL is 75 years.
