# Supplementary material
Source: MDPI journal article supplement (https://www.mdpi.com/2076-3417/11/16/7403)
Supplement: s1 [file s1]

Archive with 4 entries (4 files):
- Supplementary Files/File S1.xlsx
- Supplementary Files/File S2.xlsx
- Supplementary Files/Table S1.pdf
- Supplementary Files/Table S2.pdf
