# Supplementary material
Source: MDPI journal article supplement (https://www.mdpi.com/2076-3417/11/16/7403)
Supplement: s1 [file s1 › Supplementary Files/File S1.xlsx]

## Sheet: File S1
Data As Of	Start Date	End Date	Group	Year	Month	State	Sex	Age Group	COVID-19 Deaths	Total Deaths	Pneumonia Deaths	Pneumonia and COVID-19 Deaths	Influenza Deaths	Pneumonia, Influenza, or COVID-19 Deaths	Footnote
2021-03-31	2020-01-01	2021-03-27	By Total			United States	All Sexes	All Ages	533291	4103982	460433	259678	9020	741824
2021-03-31	2020-01-01	2021-03-27	By Total			United States	All Sexes	Under 1 year	57	22249	241	8	21	311
2021-03-31	2020-01-01	2021-03-27	By Total			United States	All Sexes	0-17 years	246	38993	658	44	179	1039
2021-03-31	2020-01-01	2021-03-27	By Total			United States	All Sexes	1-4 years	31	4010	136	5	61	223
2021-03-31	2020-01-01	2021-03-27	By Total			United States	All Sexes	5-14 years	87	6479	192	19	76	336
2021-03-31	2020-01-01	2021-03-27	By Total			United States	All Sexes	15-24 years	792	41940	919	312	81	1475
2021-03-31	2020-01-01	2021-03-27	By Total			United States	All Sexes	18-29 years	1957	74191	2150	866	150	3379
2021-03-31	2020-01-01	2021-03-27	By Total			United States	All Sexes	25-34 years	3470	86859	3433	1582	237	5540
2021-03-31	2020-01-01	2021-03-27	By Total			United States	All Sexes	30-39 years	5683	105668	5178	2607	318	8550
2021-03-31	2020-01-01	2021-03-27	By Total			United States	All Sexes	35-44 years	9104	124861	8074	4295	358	13205
2021-03-31	2020-01-01	2021-03-27	By Total			United States	All Sexes	40-49 years	15444	159249	13170	7591	494	21448
2021-03-31	2020-01-01	2021-03-27	By Total			United States	All Sexes	45-54 years	25394	230166	22037	12972	778	35120
2021-03-31	2020-01-01	2021-03-27	By Total			United States	All Sexes	50-64 years	80361	671927	73614	42520	2131	113260
2021-03-31	2020-01-01	2021-03-27	By Total			United States	All Sexes	55-64 years	64756	533464	59738	34435	1660	91466
2021-03-31	2020-01-01	2021-03-27	By Total			United States	All Sexes	65-74 years	117252	824289	106268	62656	1944	162496
2021-03-31	2020-01-01	2021-03-27	By Total			United States	All Sexes	75-84 years	148166	1002845	129796	75104	1961	204550
2021-03-31	2020-01-01	2021-03-27	By Total			United States	All Sexes	85 years and over	164182	1226820	129599	68290	1843	227102
2021-03-31	2020-01-01	2021-03-27	By Total			United States	Male	All Ages	292402	2151818	258267	150223	4663	404342
2021-03-31	2020-01-01	2021-03-27	By Total			United States	Male	Under 1 year	34	12292	142	5	10	181
2021-03-31	2020-01-01	2021-03-27	By Total			United States	Male	0-17 years	140	22880	364	24	97	577
2021-03-31	2020-01-01	2021-03-27	By Total			United States	Male	1-4 years	19	2282	65	3	38	119
2021-03-31	2020-01-01	2021-03-27	By Total			United States	Male	5-14 years	47	3855	107	13	37	178
2021-03-31	2020-01-01	2021-03-27	By Total			United States	Male	15-24 years	473	30922	553	182	38	878
2021-03-31	2020-01-01	2021-03-27	By Total			United States	Male	18-29 years	1206	54184	1292	505	77	2061
2021-03-31	2020-01-01	2021-03-27	By Total			United States	Male	25-34 years	2195	61244	2089	976	116	3412
2021-03-31	2020-01-01	2021-03-27	By Total			United States	Male	30-39 years	3709	71653	3204	1705	157	5350
2021-03-31	2020-01-01	2021-03-27	By Total			United States	Male	35-44 years	5957	81697	4974	2808	188	8284
2021-03-31	2020-01-01	2021-03-27	By Total			United States	Male	40-49 years	10154	101340	8139	4971	274	13547
2021-03-31	2020-01-01	2021-03-27	By Total			United States	Male	45-54 years	16916	144537	13784	8643	455	22430
2021-03-31	2020-01-01	2021-03-27	By Total			United States	Male	50-64 years	51808	415706	45274	27193	1234	70896
2021-03-31	2020-01-01	2021-03-27	By Total			United States	Male	55-64 years	41376	328934	36559	21768	957	56949
2021-03-31	2020-01-01	2021-03-27	By Total			United States	Male	65-74 years	71916	480189	64458	38905	1090	98353
2021-03-31	2020-01-01	2021-03-27	By Total			United States	Male	75-84 years	83656	524787	74670	44103	985	115055
2021-03-31	2020-01-01	2021-03-27	By Total			United States	Male	85 years and over	69813	481079	60866	32817	749	98503
2021-03-31	2020-01-01	2021-03-27	By Total			United States	Female	All Ages	240889	1952164	202166	109455	4357	337482
2021-03-31	2020-01-01	2021-03-27	By Total			United States	Female	Under 1 year	23	9957	99	3	11	130
2021-03-31	2020-01-01	2021-03-27	By Total			United States	Female	0-17 years	106	16113	294	20	82	462
2021-03-31	2020-01-01	2021-03-27	By Total			United States	Female	1-4 years	12	1728	71	2	23	104
2021-03-31	2020-01-01	2021-03-27	By Total			United States	Female	5-14 years	40	2624	85	6	39	158
2021-03-31	2020-01-01	2021-03-27	By Total			United States	Female	15-24 years	319	11018	366	130	43	597
2021-03-31	2020-01-01	2021-03-27	By Total			United States	Female	18-29 years	751	20007	858	361	73	1318
2021-03-31	2020-01-01	2021-03-27	By Total			United States	Female	25-34 years	1275	25615	1344	606	121	2128
2021-03-31	2020-01-01	2021-03-27	By Total			United States	Female	30-39 years	1974	34015	1974	902	161	3200
2021-03-31	2020-01-01	2021-03-27	By Total			United States	Female	35-44 years	3147	43164	3100	1487	170	4921
2021-03-31	2020-01-01	2021-03-27	By Total			United States	Female	40-49 years	5290	57909	5031	2620	220	7901
2021-03-31	2020-01-01	2021-03-27	By Total			United States	Female	45-54 years	8478	85629	8253	4329	323	12690
2021-03-31	2020-01-01	2021-03-27	By Total			United States	Female	50-64 years	28553	256221	28340	15327	897	42364
2021-03-31	2020-01-01	2021-03-27	By Total			United States	Female	55-64 years	23380	204530	23179	12667	703	34517
2021-03-31	2020-01-01	2021-03-27	By Total			United States	Female	65-74 years	45336	344100	41810	23751	854	64143
2021-03-31	2020-01-01	2021-03-27	By Total			United States	Female	75-84 years	64510	478058	55126	31001	976	89495
2021-03-31	2020-01-01	2021-03-27	By Total			United States	Female	85 years and over	94369	745741	68733	35473	1094	128599
2021-03-31	2020-01-01	2021-03-27	By Total			Alabama	All Sexes	All Ages	10052	78357	7043	3430	155	13802
2021-03-31	2020-01-01	2021-03-27	By Total			Alabama	All Sexes	Under 1 year		451					One or more data cells have counts between 1-9 and have been suppressed in accordance with NCHS confidentiality standards.
2021-03-31	2020-01-01	2021-03-27	By Total			Alabama	All Sexes	0-17 years		784	12			17	One or more data cells have counts between 1-9 and have been suppressed in accordance with NCHS confidentiality standards.
2021-03-31	2020-01-01	2021-03-27	By Total			Alabama	All Sexes	1-4 years	0	101		0			One or more data cells have counts between 1-9 and have been suppressed in accordance with NCHS confidentiality standards.
2021-03-31	2020-01-01	2021-03-27	By Total			Alabama	All Sexes	5-14 years	0	116		0	0		One or more data cells have counts between 1-9 and have been suppressed in accordance with NCHS confidentiality standards.
2021-03-31	2020-01-01	2021-03-27	By Total			Alabama	All Sexes	15-24 years	10	859	15			26	One or more data cells have counts between 1-9 and have been suppressed in accordance with NCHS confidentiality standards.
2021-03-31	2020-01-01	2021-03-27	By Total			Alabama	All Sexes	18-29 years	32	1427	29			56	One or more data cells have counts between 1-9 and have been suppressed in accordance with NCHS confidentiality standards.
2021-03-31	2020-01-01	2021-03-27	By Total			Alabama	All Sexes	25-34 years	67	1607	61	25		107	One or more data cells have counts between 1-9 and have been suppressed in accordance with NCHS confidentiality standards.
2021-03-31	2020-01-01	2021-03-27	By Total			Alabama	All Sexes	30-39 years	114	2033	102	38		183	One or more data cells have counts between 1-9 and have been suppressed in accordance with NCHS confidentiality standards.
2021-03-31	2020-01-01	2021-03-27	By Total			Alabama	All Sexes	35-44 years	195	2587	142	60		283	One or more data cells have counts between 1-9 and have been suppressed in accordance with NCHS confidentiality standards.
2021-03-31	2020-01-01	2021-03-27	By Total			Alabama	All Sexes	40-49 years	307	3424	219	96		436	One or more data cells have counts between 1-9 and have been suppressed in accordance with NCHS confidentiality standards.
2021-03-31	2020-01-01	2021-03-27	By Total			Alabama	All Sexes	45-54 years	537	4947	360	175	15	736
2021-03-31	2020-01-01	2021-03-27	By Total			Alabama	All Sexes	50-64 years	1740	14560	1254	571	52	2471
2021-03-31	2020-01-01	2021-03-27	By Total			Alabama	All Sexes	55-64 years	1385	11560	1027	452	40	1997
2021-03-31	2020-01-01	2021-03-27	By Total			Alabama	All Sexes	65-74 years	2599	17357	1825	923	44	3542
2021-03-31	2020-01-01	2021-03-27	By Total			Alabama	All Sexes	75-84 years	2928	20016	2066	1060	26	3955
2021-03-31	2020-01-01	2021-03-27	By Total			Alabama	All Sexes	85 years and over	2329	18756	1536	733	15	3142
2021-03-31	2020-01-01	2021-03-27	By Total			Alabama	Male	All Ages	5383	40890	3847	1880	91	7431
2021-03-31	2020-01-01	2021-03-27	By Total			Alabama	Male	Under 1 year		260		0			One or more data cells have counts between 1-9 and have been suppressed in accordance with NCHS confidentiality standards.
2021-03-31	2020-01-01	2021-03-27	By Total			Alabama	Male	0-17 years		486		0			One or more data cells have counts between 1-9 and have been suppressed in accordance with NCHS confidentiality standards.
2021-03-31	2020-01-01	2021-03-27	By Total			Alabama	Male	1-4 years	0	57	0	0	0	0
2021-03-31	2020-01-01	2021-03-27	By Total			Alabama	Male	5-14 years	0	76		0	0		One or more data cells have counts between 1-9 and have been suppressed in accordance with NCHS confidentiality standards.
2021-03-31	2020-01-01	2021-03-27	By Total			Alabama	Male	15-24 years		644				13	One or more data cells have counts between 1-9 and have been suppressed in accordance with NCHS confidentiality standards.
2021-03-31	2020-01-01	2021-03-27	By Total			Alabama	Male	18-29 years	23	1059	15			35	One or more data cells have counts between 1-9 and have been suppressed in accordance with NCHS confidentiality standards.
2021-03-31	2020-01-01	2021-03-27	By Total			Alabama	Male	25-34 years	41	1115	37	14		66	One or more data cells have counts between 1-9 and have been suppressed in accordance with NCHS confidentiality standards.
2021-03-31	2020-01-01	2021-03-27	By Total			Alabama	Male	30-39 years	67	1319	63	24		108	One or more data cells have counts between 1-9 and have been suppressed in accordance with NCHS confidentiality standards.
2021-03-31	2020-01-01	2021-03-27	By Total			Alabama	Male	35-44 years	112	1625	88	38		165	One or more data cells have counts between 1-9 and have been suppressed in accordance with NCHS confidentiality standards.
2021-03-31	2020-01-01	2021-03-27	By Total			Alabama	Male	40-49 years	176	2114	136	57		258	One or more data cells have counts between 1-9 and have been suppressed in accordance with NCHS confidentiality standards.
2021-03-31	2020-01-01	2021-03-27	By Total			Alabama	Male	45-54 years	298	2978	210	96		419	One or more data cells have counts between 1-9 and have been suppressed in accordance with NCHS confidentiality standards.
2021-03-31	2020-01-01	2021-03-27	By Total			Alabama	Male	50-64 years	983	8714	694	313	33	1394
2021-03-31	2020-01-01	2021-03-27	By Total			Alabama	Male	55-64 years	793	6937	568	251	27	1135
2021-03-31	2020-01-01	2021-03-27	By Total			Alabama	Male	65-74 years	1538	10043	1096	554	27	2105
2021-03-31	2020-01-01	2021-03-27	By Total			Alabama	Male	75-84 years	1612	10133	1130	584	13	2168
2021-03-31	2020-01-01	2021-03-27	By Total			Alabama	Male	85 years and over	982	7022	709	342		1355	One or more data cells have counts between 1-9 and have been suppressed in accordance with NCHS confidentiality standards.
2021-03-31	2020-01-01	2021-03-27	By Total			Alabama	Female	All Ages	4669	37467	3196	1550	64	6371
2021-03-31	2020-01-01	2021-03-27	By Total			Alabama	Female	Under 1 year		191			0		One or more data cells have counts between 1-9 and have been suppressed in accordance with NCHS confidentiality standards.
2021-03-31	2020-01-01	2021-03-27	By Total			Alabama	Female	0-17 years		298					One or more data cells have counts between 1-9 and have been suppressed in accordance with NCHS confidentiality standards.
2021-03-31	2020-01-01	2021-03-27	By Total			Alabama	Female	1-4 years	0	44		0			One or more data cells have counts between 1-9 and have been suppressed in accordance with NCHS confidentiality standards.
2021-03-31	2020-01-01	2021-03-27	By Total			Alabama	Female	5-14 years	0	40		0	0		One or more data cells have counts between 1-9 and have been suppressed in accordance with NCHS confidentiality standards.
2021-03-31	2020-01-01	2021-03-27	By Total			Alabama	Female	15-24 years		215		0	0	13	One or more data cells have counts between 1-9 and have been suppressed in accordance with NCHS confidentiality standards.
2021-03-31	2020-01-01	2021-03-27	By Total			Alabama	Female	18-29 years		368	14		0	21	One or more data cells have counts between 1-9 and have been suppressed in accordance with NCHS confidentiality standards.
2021-03-31	2020-01-01	2021-03-27	By Total			Alabama	Female	25-34 years	26	492	24	11		41	One or more data cells have counts between 1-9 and have been suppressed in accordance with NCHS confidentiality standards.
2021-03-31	2020-01-01	2021-03-27	By Total			Alabama	Female	30-39 years	47	714	39	14		75	One or more data cells have counts between 1-9 and have been suppressed in accordance with NCHS confidentiality standards.
2021-03-31	2020-01-01	2021-03-27	By Total			Alabama	Female	35-44 years	83	962	54	22		118	One or more data cells have counts between 1-9 and have been suppressed in accordance with NCHS confidentiality standards.
2021-03-31	2020-01-01	2021-03-27	By Total			Alabama	Female	40-49 years	131	1310	83	39		178	One or more data cells have counts between 1-9 and have been suppressed in accordance with NCHS confidentiality standards.
2021-03-31	2020-01-01	2021-03-27	By Total			Alabama	Female	45-54 years	239	1969	150	79		317	One or more data cells have counts between 1-9 and have been suppressed in accordance with NCHS confidentiality standards.
2021-03-31	2020-01-01	2021-03-27	By Total			Alabama	Female	50-64 years	757	5846	560	258	19	1077
2021-03-31	2020-01-01	2021-03-27	By Total			Alabama	Female	55-64 years	592	4623	459	201	13	862
2021-03-31	2020-01-01	2021-03-27	By Total			Alabama	Female	65-74 years	1061	7314	729	369	17	1437
2021-03-31	2020-01-01	2021-03-27	By Total			Alabama	Female	75-84 years	1316	9883	936	476	13	1787
2021-03-31	2020-01-01	2021-03-27	By Total			Alabama	Female	85 years and over	1347	11734	827	391		1787	One or more data cells have counts between 1-9 and have been suppressed in accordance with NCHS confidentiality standards.
2021-03-31	2020-01-01	2021-03-27	By Total			Alaska	All Sexes	All Ages	306	5794	355	165		505	One or more data cells have counts between 1-9 and have been suppressed in accordance with NCHS confidentiality standards.
2021-03-31	2020-01-01	2021-03-27	By Total			Alaska	All Sexes	Under 1 year	0	54	0	0	0	0
2021-03-31	2020-01-01	2021-03-27	By Total			Alaska	All Sexes	0-17 years	0	117		0			One or more data cells have counts between 1-9 and have been suppressed in accordance with NCHS confidentiality standards.
2021-03-31	2020-01-01	2021-03-27	By Total			Alaska	All Sexes	1-4 years	0			0			One or more data cells have counts between 1-9 and have been suppressed in accordance with NCHS confidentiality standards.
2021-03-31	2020-01-01	2021-03-27	By Total			Alaska	All Sexes	5-14 years	0	32	0	0	0	0
2021-03-31	2020-01-01	2021-03-27	By Total			Alaska	All Sexes	15-24 years		140			0		One or more data cells have counts between 1-9 and have been suppressed in accordance with NCHS confidentiality standards.
2021-03-31	2020-01-01	2021-03-27	By Total			Alaska	All Sexes	18-29 years		223			0		One or more data cells have counts between 1-9 and have been suppressed in accordance with NCHS confidentiality standards.
2021-03-31	2020-01-01	2021-03-27	By Total			Alaska	All Sexes	25-34 years		255			0		One or more data cells have counts between 1-9 and have been suppressed in accordance with NCHS confidentiality standards.
2021-03-31	2020-01-01	2021-03-27	By Total			Alaska	All Sexes	30-39 years		307	12		0	16	One or more data cells have counts between 1-9 and have been suppressed in accordance with NCHS confidentiality standards.
2021-03-31	2020-01-01	2021-03-27	By Total			Alaska	All Sexes	35-44 years	10	306	19		0	23	One or more data cells have counts between 1-9 and have been suppressed in accordance with NCHS confidentiality standards.
2021-03-31	2020-01-01	2021-03-27	By Total			Alaska	All Sexes	40-49 years	13	345	20		0	25	One or more data cells have counts between 1-9 and have been suppressed in accordance with NCHS confidentiality standards.
2021-03-31	2020-01-01	2021-03-27	By Total			Alaska	All Sexes	45-54 years	13	451	18		0	27	One or more data cells have counts between 1-9 and have been suppressed in accordance with NCHS confidentiality standards.
2021-03-31	2020-01-01	2021-03-27	By Total			Alaska	All Sexes	50-64 years	42	1208	61	20		84	One or more data cells have counts between 1-9 and have been suppressed in accordance with NCHS confidentiality standards.
2021-03-31	2020-01-01	2021-03-27	By Total			Alaska	All Sexes	55-64 years	36	955	53	19		71	One or more data cells have counts between 1-9 and have been suppressed in accordance with NCHS confidentiality standards.
2021-03-31	2020-01-01	2021-03-27	By Total			Alaska	All Sexes	65-74 years	79	1252	86	47		120	One or more data cells have counts between 1-9 and have been suppressed in accordance with NCHS confidentiality standards.
2021-03-31	2020-01-01	2021-03-27	By Total			Alaska	All Sexes	75-84 years	88	1260	90	50		130	One or more data cells have counts between 1-9 and have been suppressed in accordance with NCHS confidentiality standards.
2021-03-31	2020-01-01	2021-03-27	By Total			Alaska	All Sexes	85 years and over	75	1082	79	37		119	One or more data cells have counts between 1-9 and have been suppressed in accordance with NCHS confidentiality standards.
2021-03-31	2020-01-01	2021-03-27	By Total			Alaska	Male	All Ages	181	3346	204	92		298	One or more data cells have counts between 1-9 and have been suppressed in accordance with NCHS confidentiality standards.
2021-03-31	2020-01-01	2021-03-27	By Total			Alaska	Male	Under 1 year	0	34	0	0	0	0
2021-03-31	2020-01-01	2021-03-27	By Total			Alaska	Male	0-17 years	0	78	0	0			One or more data cells have counts between 1-9 and have been suppressed in accordance with NCHS confidentiality standards.
2021-03-31	2020-01-01	2021-03-27	By Total			Alaska	Male	1-4 years	0		0	0			One or more data cells have counts between 1-9 and have been suppressed in accordance with NCHS confidentiality standards.
2021-03-31	2020-01-01	2021-03-27	By Total			Alaska	Male	5-14 years	0	24	0	0	0	0
2021-03-31	2020-01-01	2021-03-27	By Total			Alaska	Male	15-24 years	0	99		0	0		One or more data cells have counts between 1-9 and have been suppressed in accordance with NCHS confidentiality standards.
2021-03-31	2020-01-01	2021-03-27	By Total			Alaska	Male	18-29 years		153		0	0		One or more data cells have counts between 1-9 and have been suppressed in accordance with NCHS confidentiality standards.
2021-03-31	2020-01-01	2021-03-27	By Total			Alaska	Male	25-34 years		160		0	0		One or more data cells have counts between 1-9 and have been suppressed in accordance with NCHS confidentiality standards.
2021-03-31	2020-01-01	2021-03-27	By Total			Alaska	Male	30-39 years		193			0	12	One or more data cells have counts between 1-9 and have been suppressed in accordance with NCHS confidentiality standards.
2021-03-31	2020-01-01	2021-03-27	By Total			Alaska	Male	35-44 years		192	13		0	16	One or more data cells have counts between 1-9 and have been suppressed in accordance with NCHS confidentiality standards.
2021-03-31	2020-01-01	2021-03-27	By Total			Alaska	Male	40-49 years		199	13		0	15	One or more data cells have counts between 1-9 and have been suppressed in accordance with NCHS confidentiality standards.
2021-03-31	2020-01-01	2021-03-27	By Total			Alaska	Male	45-54 years		280			0	15	One or more data cells have counts between 1-9 and have been suppressed in accordance with NCHS confidentiality standards.
2021-03-31	2020-01-01	2021-03-27	By Total			Alaska	Male	50-64 years	23	777	33	10		47	One or more data cells have counts between 1-9 and have been suppressed in accordance with NCHS confidentiality standards.
2021-03-31	2020-01-01	2021-03-27	By Total			Alaska	Male	55-64 years	19	606	30	10		40	One or more data cells have counts between 1-9 and have been suppressed in accordance with NCHS confidentiality standards.
2021-03-31	2020-01-01	2021-03-27	By Total			Alaska	Male	65-74 years	55	748	51	30	0	76
2021-03-31	2020-01-01	2021-03-27	By Total			Alaska	Male	75-84 years	55	735	58	29		85	One or more data cells have counts between 1-9 and have been suppressed in accordance with NCHS confidentiality standards.
2021-03-31	2020-01-01	2021-03-27	By Total			Alaska	Male	85 years and over	37	463	39	18		60	One or more data cells have counts between 1-9 and have been suppressed in accordance with NCHS confidentiality standards.
2021-03-31	2020-01-01	2021-03-27	By Total			Alaska	Female	All Ages	125	2448	151	73		207	One or more data cells have counts between 1-9 and have been suppressed in accordance with NCHS confidentiality standards.
2021-03-31	2020-01-01	2021-03-27	By Total			Alaska	Female	Under 1 year	0	20	0	0	0	0
2021-03-31	2020-01-01	2021-03-27	By Total			Alaska	Female	0-17 years	0	39		0			One or more data cells have counts between 1-9 and have been suppressed in accordance with NCHS confidentiality standards.
2021-03-31	2020-01-01	2021-03-27	By Total			Alaska	Female	1-4 years	0			0			One or more data cells have counts between 1-9 and have been suppressed in accordance with NCHS confidentiality standards.
2021-03-31	2020-01-01	2021-03-27	By Total			Alaska	Female	5-14 years	0		0	0	0	0	One or more data cells have counts between 1-9 and have been suppressed in accordance with NCHS confidentiality standards.
2021-03-31	2020-01-01	2021-03-27	By Total			Alaska	Female	15-24 years		41			0		One or more data cells have counts between 1-9 and have been suppressed in accordance with NCHS confidentiality standards.
2021-03-31	2020-01-01	2021-03-27	By Total			Alaska	Female	18-29 years		70			0		One or more data cells have counts between 1-9 and have been suppressed in accordance with NCHS confidentiality standards.
2021-03-31	2020-01-01	2021-03-27	By Total			Alaska	Female	25-34 years		95			0		One or more data cells have counts between 1-9 and have been suppressed in accordance with NCHS confidentiality standards.
2021-03-31	2020-01-01	2021-03-27	By Total			Alaska	Female	30-39 years		114		0	0		One or more data cells have counts between 1-9 and have been suppressed in accordance with NCHS confidentiality standards.
2021-03-31	2020-01-01	2021-03-27	By Total			Alaska	Female	35-44 years		114			0		One or more data cells have counts between 1-9 and have been suppressed in accordance with NCHS confidentiality standards.
2021-03-31	2020-01-01	2021-03-27	By Total			Alaska	Female	40-49 years		146			0	10	One or more data cells have counts between 1-9 and have been suppressed in accordance with NCHS confidentiality standards.
2021-03-31	2020-01-01	2021-03-27	By Total			Alaska	Female	45-54 years		171			0	12	One or more data cells have counts between 1-9 and have been suppressed in accordance with NCHS confidentiality standards.
2021-03-31	2020-01-01	2021-03-27	By Total			Alaska	Female	50-64 years	19	431	28	10	0	37
2021-03-31	2020-01-01	2021-03-27	By Total			Alaska	Female	55-64 years	17	349	23		0	31	One or more data cells have counts between 1-9 and have been suppressed in accordance with NCHS confidentiality standards.
2021-03-31	2020-01-01	2021-03-27	By Total			Alaska	Female	65-74 years	24	504	35	17		44	One or more data cells have counts between 1-9 and have been suppressed in accordance with NCHS confidentiality standards.
2021-03-31	2020-01-01	2021-03-27	By Total			Alaska	Female	75-84 years	33	525	32	21		45	One or more data cells have counts between 1-9 and have been suppressed in accordance with NCHS confidentiality standards.
2021-03-31	2020-01-01	2021-03-27	By Total			Alaska	Female	85 years and over	38	619	40	19	0	59
2021-03-31	2020-01-01	2021-03-27	By Total			Arizona	All Sexes	All Ages	15170	97197	13521	8989	152	19850
2021-03-31	2020-01-01	2021-03-27	By Total			Arizona	All Sexes	Under 1 year	0	469		0			One or more data cells have counts between 1-9 and have been suppressed in accordance with NCHS confidentiality standards.
2021-03-31	2020-01-01	2021-03-27	By Total			Arizona	All Sexes	0-17 years	12	980	22			33	One or more data cells have counts between 1-9 and have been suppressed in accordance with NCHS confidentiality standards.
2021-03-31	2020-01-01	2021-03-27	By Total			Arizona	All Sexes	1-4 years		122		0			One or more data cells have counts between 1-9 and have been suppressed in accordance with NCHS confidentiality standards.
2021-03-31	2020-01-01	2021-03-27	By Total			Arizona	All Sexes	5-14 years		170				13	One or more data cells have counts between 1-9 and have been suppressed in accordance with NCHS confidentiality standards.
2021-03-31	2020-01-01	2021-03-27	By Total			Arizona	All Sexes	15-24 years	43	1339	43	25		63	One or more data cells have counts between 1-9 and have been suppressed in accordance with NCHS confidentiality standards.
2021-03-31	2020-01-01	2021-03-27	By Total			Arizona	All Sexes	18-29 years	105	2279	91	60		138	One or more data cells have counts between 1-9 and have been suppressed in accordance with NCHS confidentiality standards.
2021-03-31	2020-01-01	2021-03-27	By Total			Arizona	All Sexes	25-34 years	174	2587	142	94		226	One or more data cells have counts between 1-9 and have been suppressed in accordance with NCHS confidentiality standards.
2021-03-31	2020-01-01	2021-03-27	By Total			Arizona	All Sexes	30-39 years	276	3002	217	150		348	One or more data cells have counts between 1-9 and have been suppressed in accordance with NCHS confidentiality standards.
2021-03-31	2020-01-01	2021-03-27	By Total			Arizona	All Sexes	35-44 years	393	3297	295	210		485	One or more data cells have counts between 1-9 and have been suppressed in accordance with NCHS confidentiality standards.
2021-03-31	2020-01-01	2021-03-27	By Total			Arizona	All Sexes	40-49 years	610	4008	488	360	12	749
2021-03-31	2020-01-01	2021-03-27	By Total			Arizona	All Sexes	45-54 years	945	5577	798	583	16	1175
2021-03-31	2020-01-01	2021-03-27	By Total			Arizona	All Sexes	50-64 years	2769	15777	2457	1696	37	3566
2021-03-31	2020-01-01	2021-03-27	By Total			Arizona	All Sexes	55-64 years	2208	12485	1980	1354	26	2860
2021-03-31	2020-01-01	2021-03-27	By Total			Arizona	All Sexes	65-74 years	3611	20107	3313	2282	39	4680
2021-03-31	2020-01-01	2021-03-27	By Total			Arizona	All Sexes	75-84 years	4343	25161	3940	2618	30	5694
2021-03-31	2020-01-01	2021-03-27	By Total			Arizona	All Sexes	85 years and over	3444	25883	2993	1817	22	4642
2021-03-31	2020-01-01	2021-03-27	By Total			Arizona	Male	All Ages	8925	53653	7924	5408	83	11521
2021-03-31	2020-01-01	2021-03-27	By Total			Arizona	Male	Under 1 year	0	261		0			One or more data cells have counts between 1-9 and have been suppressed in accordance with NCHS confidentiality standards.
2021-03-31	2020-01-01	2021-03-27	By Total			Arizona	Male	0-17 years		584	12			21	One or more data cells have counts between 1-9 and have been suppressed in accordance with NCHS confidentiality standards.
2021-03-31	2020-01-01	2021-03-27	By Total			Arizona	Male	1-4 years		68		0			One or more data cells have counts between 1-9 and have been suppressed in accordance with NCHS confidentiality standards.
2021-03-31	2020-01-01	2021-03-27	By Total			Arizona	Male	5-14 years		90					One or more data cells have counts between 1-9 and have been suppressed in accordance with NCHS confidentiality standards.
2021-03-31	2020-01-01	2021-03-27	By Total			Arizona	Male	15-24 years	28	1023	25	13		42	One or more data cells have counts between 1-9 and have been suppressed in accordance with NCHS confidentiality standards.
2021-03-31	2020-01-01	2021-03-27	By Total			Arizona	Male	18-29 years	61	1708	57	36		84	One or more data cells have counts between 1-9 and have been suppressed in accordance with NCHS confidentiality standards.
2021-03-31	2020-01-01	2021-03-27	By Total			Arizona	Male	25-34 years	104	1854	84	58		132	One or more data cells have counts between 1-9 and have been suppressed in accordance with NCHS confidentiality standards.
2021-03-31	2020-01-01	2021-03-27	By Total			Arizona	Male	30-39 years	178	2075	129	97		213	One or more data cells have counts between 1-9 and have been suppressed in accordance with NCHS confidentiality standards.
2021-03-31	2020-01-01	2021-03-27	By Total			Arizona	Male	35-44 years	251	2232	191	139		307	One or more data cells have counts between 1-9 and have been suppressed in accordance with NCHS confidentiality standards.
2021-03-31	2020-01-01	2021-03-27	By Total			Arizona	Male	40-49 years	377	2619	296	219		458	One or more data cells have counts between 1-9 and have been suppressed in accordance with NCHS confidentiality standards.
2021-03-31	2020-01-01	2021-03-27	By Total			Arizona	Male	45-54 years	626	3543	502	379		757	One or more data cells have counts between 1-9 and have been suppressed in accordance with NCHS confidentiality standards.
2021-03-31	2020-01-01	2021-03-27	By Total			Arizona	Male	50-64 years	1769	9845	1540	1082	22	2249
2021-03-31	2020-01-01	2021-03-27	By Total			Arizona	Male	55-64 years	1379	7760	1224	845	15	1773
2021-03-31	2020-01-01	2021-03-27	By Total			Arizona	Male	65-74 years	2188	11838	1974	1385	20	2796
2021-03-31	2020-01-01	2021-03-27	By Total			Arizona	Male	75-84 years	2633	13804	2375	1617	15	3405
2021-03-31	2020-01-01	2021-03-27	By Total			Arizona	Male	85 years and over	1711	11180	1541	969	12	2295
2021-03-31	2020-01-01	2021-03-27	By Total			Arizona	Female	All Ages	6245	43544	5597	3581	69	8329
2021-03-31	2020-01-01	2021-03-27	By Total			Arizona	Female	Under 1 year	0	208		0	0		One or more data cells have counts between 1-9 and have been suppressed in accordance with NCHS confidentiality standards.
2021-03-31	2020-01-01	2021-03-27	By Total			Arizona	Female	0-17 years		396	10			12	One or more data cells have counts between 1-9 and have been suppressed in accordance with NCHS confidentiality standards.
2021-03-31	2020-01-01	2021-03-27	By Total			Arizona	Female	1-4 years	0	54		0	0		One or more data cells have counts between 1-9 and have been suppressed in accordance with NCHS confidentiality standards.
2021-03-31	2020-01-01	2021-03-27	By Total			Arizona	Female	5-14 years		80					One or more data cells have counts between 1-9 and have been suppressed in accordance with NCHS confidentiality standards.
2021-03-31	2020-01-01	2021-03-27	By Total			Arizona	Female	15-24 years	15	316	18	12	0	21
2021-03-31	2020-01-01	2021-03-27	By Total			Arizona	Female	18-29 years	44	571	34	24	0	54
2021-03-31	2020-01-01	2021-03-27	By Total			Arizona	Female	25-34 years	70	733	58	36		94	One or more data cells have counts between 1-9 and have been suppressed in accordance with NCHS confidentiality standards.
2021-03-31	2020-01-01	2021-03-27	By Total			Arizona	Female	30-39 years	98	927	88	53		135	One or more data cells have counts between 1-9 and have been suppressed in accordance with NCHS confidentiality standards.
2021-03-31	2020-01-01	2021-03-27	By Total			Arizona	Female	35-44 years	142	1065	104	71		178	One or more data cells have counts between 1-9 and have been suppressed in accordance with NCHS confidentiality standards.
2021-03-31	2020-01-01	2021-03-27	By Total			Arizona	Female	40-49 years	233	1389	192	141		291	One or more data cells have counts between 1-9 and have been suppressed in accordance with NCHS confidentiality standards.
2021-03-31	2020-01-01	2021-03-27	By Total			Arizona	Female	45-54 years	319	2034	296	204		418	One or more data cells have counts between 1-9 and have been suppressed in accordance with NCHS confidentiality standards.
2021-03-31	2020-01-01	2021-03-27	By Total			Arizona	Female	50-64 years	1000	5932	917	614	15	1317
2021-03-31	2020-01-01	2021-03-27	By Total			Arizona	Female	55-64 years	829	4725	756	509	11	1087
2021-03-31	2020-01-01	2021-03-27	By Total			Arizona	Female	65-74 years	1423	8269	1339	897	19	1884
2021-03-31	2020-01-01	2021-03-27	By Total			Arizona	Female	75-84 years	1710	11357	1565	1001	15	2289
2021-03-31	2020-01-01	2021-03-27	By Total			Arizona	Female	85 years and over	1733	14703	1452	848	10	2347
2021-03-31	2020-01-01	2021-03-27	By Total			Arkansas	All Sexes	All Ages	5750	46756	5211	2701	107	8359
2021-03-31	2020-01-01	2021-03-27	By Total			Arkansas	All Sexes	Under 1 year	0	282		0	0		One or more data cells have counts between 1-9 and have been suppressed in accordance with NCHS confidentiality standards.
2021-03-31	2020-01-01	2021-03-27	By Total			Arkansas	All Sexes	0-17 years		503	10			12	One or more data cells have counts between 1-9 and have been suppressed in accordance with NCHS confidentiality standards.
2021-03-31	2020-01-01	2021-03-27	By Total			Arkansas	All Sexes	1-4 years		54					One or more data cells have counts between 1-9 and have been suppressed in accordance with NCHS confidentiality standards.
2021-03-31	2020-01-01	2021-03-27	By Total			Arkansas	All Sexes	5-14 years	0	84		0	0		One or more data cells have counts between 1-9 and have been suppressed in accordance with NCHS confidentiality standards.
2021-03-31	2020-01-01	2021-03-27	By Total			Arkansas	All Sexes	15-24 years		496	14			18	One or more data cells have counts between 1-9 and have been suppressed in accordance with NCHS confidentiality standards.
2021-03-31	2020-01-01	2021-03-27	By Total			Arkansas	All Sexes	18-29 years	16	797	26			36	One or more data cells have counts between 1-9 and have been suppressed in accordance with NCHS confidentiality standards.
2021-03-31	2020-01-01	2021-03-27	By Total			Arkansas	All Sexes	25-34 years	31	884	39	13		58	One or more data cells have counts between 1-9 and have been suppressed in accordance with NCHS confidentiality standards.
2021-03-31	2020-01-01	2021-03-27	By Total			Arkansas	All Sexes	30-39 years	52	1197	53	18		90	One or more data cells have counts between 1-9 and have been suppressed in accordance with NCHS confidentiality standards.
2021-03-31	2020-01-01	2021-03-27	By Total			Arkansas	All Sexes	35-44 years	82	1519	99	28		158	One or more data cells have counts between 1-9 and have been suppressed in accordance with NCHS confidentiality standards.
2021-03-31	2020-01-01	2021-03-27	By Total			Arkansas	All Sexes	40-49 years	167	2011	171	78		265	One or more data cells have counts between 1-9 and have been suppressed in accordance with NCHS confidentiality standards.
2021-03-31	2020-01-01	2021-03-27	By Total			Arkansas	All Sexes	45-54 years	249	2832	251	126		381	One or more data cells have counts between 1-9 and have been suppressed in accordance with NCHS confidentiality standards.
2021-03-31	2020-01-01	2021-03-27	By Total			Arkansas	All Sexes	50-64 years	809	8431	852	422	30	1267
2021-03-31	2020-01-01	2021-03-27	By Total			Arkansas	All Sexes	55-64 years	677	6788	700	356	24	1044
2021-03-31	2020-01-01	2021-03-27	By Total			Arkansas	All Sexes	65-74 years	1286	10247	1231	655	29	1889
2021-03-31	2020-01-01	2021-03-27	By Total			Arkansas	All Sexes	75-84 years	1709	11830	1521	815	19	2433
2021-03-31	2020-01-01	2021-03-27	By Total			Arkansas	All Sexes	85 years and over	1710	11740	1347	704	17	2367
2021-03-31	2020-01-01	2021-03-27	By Total			Arkansas	Male	All Ages	2985	24427	2817	1503	53	4350
2021-03-31	2020-01-01	2021-03-27	By Total			Arkansas	Male	Under 1 year	0	163		0	0		One or more data cells have counts between 1-9 and have been suppressed in accordance with NCHS confidentiality standards.
2021-03-31	2020-01-01	2021-03-27	By Total			Arkansas	Male	0-17 years	0	308		0			One or more data cells have counts between 1-9 and have been suppressed in accordance with NCHS confidentiality standards.
2021-03-31	2020-01-01	2021-03-27	By Total			Arkansas	Male	1-4 years	0	30	0	0			One or more data cells have counts between 1-9 and have been suppressed in accordance with NCHS confidentiality standards.
2021-03-31	2020-01-01	2021-03-27	By Total			Arkansas	Male	5-14 years	0	51	0	0	0	0
2021-03-31	2020-01-01	2021-03-27	By Total			Arkansas	Male	15-24 years		357				10	One or more data cells have counts between 1-9 and have been suppressed in accordance with NCHS confidentiality standards.
2021-03-31	2020-01-01	2021-03-27	By Total			Arkansas	Male	18-29 years		557	15			22	One or more data cells have counts between 1-9 and have been suppressed in accordance with NCHS confidentiality standards.
2021-03-31	2020-01-01	2021-03-27	By Total			Arkansas	Male	25-34 years	18	608	22			36	One or more data cells have counts between 1-9 and have been suppressed in accordance with NCHS confidentiality standards.
2021-03-31	2020-01-01	2021-03-27	By Total			Arkansas	Male	30-39 years	30	772	27			50	One or more data cells have counts between 1-9 and have been suppressed in accordance with NCHS confidentiality standards.
2021-03-31	2020-01-01	2021-03-27	By Total			Arkansas	Male	35-44 years	48	926	59	18		92	One or more data cells have counts between 1-9 and have been suppressed in accordance with NCHS confidentiality standards.
2021-03-31	2020-01-01	2021-03-27	By Total			Arkansas	Male	40-49 years	93	1174	97	46		148	One or more data cells have counts between 1-9 and have been suppressed in accordance with NCHS confidentiality standards.
2021-03-31	2020-01-01	2021-03-27	By Total			Arkansas	Male	45-54 years	154	1674	140	77		221	One or more data cells have counts between 1-9 and have been suppressed in accordance with NCHS confidentiality standards.
2021-03-31	2020-01-01	2021-03-27	By Total			Arkansas	Male	50-64 years	488	5087	495	249	18	751
2021-03-31	2020-01-01	2021-03-27	By Total			Arkansas	Male	55-64 years	397	4089	405	205	15	612
2021-03-31	2020-01-01	2021-03-27	By Total			Arkansas	Male	65-74 years	735	5901	702	377	14	1074
2021-03-31	2020-01-01	2021-03-27	By Total			Arkansas	Male	75-84 years	936	6168	838	469		1314	One or more data cells have counts between 1-9 and have been suppressed in accordance with NCHS confidentiality standards.
2021-03-31	2020-01-01	2021-03-27	By Total			Arkansas	Male	85 years and over	695	4460	640	351		987	One or more data cells have counts between 1-9 and have been suppressed in accordance with NCHS confidentiality standards.
2021-03-31	2020-01-01	2021-03-27	By Total			Arkansas	Female	All Ages	2765	22329	2394	1198	54	4009
2021-03-31	2020-01-01	2021-03-27	By Total			Arkansas	Female	Under 1 year	0	119		0	0		One or more data cells have counts between 1-9 and have been suppressed in accordance with NCHS confidentiality standards.
2021-03-31	2020-01-01	2021-03-27	By Total			Arkansas	Female	0-17 years		195					One or more data cells have counts between 1-9 and have been suppressed in accordance with NCHS confidentiality standards.
2021-03-31	2020-01-01	2021-03-27	By Total			Arkansas	Female	1-4 years		24					One or more data cells have counts between 1-9 and have been suppressed in accordance with NCHS confidentiality standards.
2021-03-31	2020-01-01	2021-03-27	By Total			Arkansas	Female	5-14 years	0	33		0	0		One or more data cells have counts between 1-9 and have been suppressed in accordance with NCHS confidentiality standards.
2021-03-31	2020-01-01	2021-03-27	By Total			Arkansas	Female	15-24 years		139					One or more data cells have counts between 1-9 and have been suppressed in accordance with NCHS confidentiality standards.
2021-03-31	2020-01-01	2021-03-27	By Total			Arkansas	Female	18-29 years		240	11			14	One or more data cells have counts between 1-9 and have been suppressed in accordance with NCHS confidentiality standards.
2021-03-31	2020-01-01	2021-03-27	By Total			Arkansas	Female	25-34 years	13	276	17		0	22	One or more data cells have counts between 1-9 and have been suppressed in accordance with NCHS confidentiality standards.
2021-03-31	2020-01-01	2021-03-27	By Total			Arkansas	Female	30-39 years	22	425	26			40	One or more data cells have counts between 1-9 and have been suppressed in accordance with NCHS confidentiality standards.
2021-03-31	2020-01-01	2021-03-27	By Total			Arkansas	Female	35-44 years	34	593	40	10		66	One or more data cells have counts between 1-9 and have been suppressed in accordance with NCHS confidentiality standards.
2021-03-31	2020-01-01	2021-03-27	By Total			Arkansas	Female	40-49 years	74	837	74	32		117	One or more data cells have counts between 1-9 and have been suppressed in accordance with NCHS confidentiality standards.
2021-03-31	2020-01-01	2021-03-27	By Total			Arkansas	Female	45-54 years	95	1158	111	49		160	One or more data cells have counts between 1-9 and have been suppressed in accordance with NCHS confidentiality standards.
2021-03-31	2020-01-01	2021-03-27	By Total			Arkansas	Female	50-64 years	321	3344	357	173	12	516
2021-03-31	2020-01-01	2021-03-27	By Total			Arkansas	Female	55-64 years	280	2699	295	151		432	One or more data cells have counts between 1-9 and have been suppressed in accordance with NCHS confidentiality standards.
2021-03-31	2020-01-01	2021-03-27	By Total			Arkansas	Female	65-74 years	551	4346	529	278	15	815
2021-03-31	2020-01-01	2021-03-27	By Total			Arkansas	Female	75-84 years	773	5662	683	346	10	1119
2021-03-31	2020-01-01	2021-03-27	By Total			Arkansas	Female	85 years and over	1015	7280	707	353	13	1380
2021-03-31	2020-01-01	2021-03-27	By Total			California	All Sexes	All Ages	60210	405429	56839	35545	847	82331
2021-03-31	2020-01-01	2021-03-27	By Total			California	All Sexes	Under 1 year		1942	26			30	One or more data cells have counts between 1-9 and have been suppressed in accordance with NCHS confidentiality standards.
2021-03-31	2020-01-01	2021-03-27	By Total			California	All Sexes	0-17 years	21	3563	74		20	111	One or more data cells have counts between 1-9 and have been suppressed in accordance with NCHS confidentiality standards.
2021-03-31	2020-01-01	2021-03-27	By Total			California	All Sexes	1-4 years		367	14	0		23	One or more data cells have counts between 1-9 and have been suppressed in accordance with NCHS confidentiality standards.
2021-03-31	2020-01-01	2021-03-27	By Total			California	All Sexes	5-14 years		629	27			39	One or more data cells have counts between 1-9 and have been suppressed in accordance with NCHS confidentiality standards.
2021-03-31	2020-01-01	2021-03-27	By Total			California	All Sexes	15-24 years	122	4587	120	55		195	One or more data cells have counts between 1-9 and have been suppressed in accordance with NCHS confidentiality standards.
2021-03-31	2020-01-01	2021-03-27	By Total			California	All Sexes	18-29 years	308	8121	304	145	20	487
2021-03-31	2020-01-01	2021-03-27	By Total			California	All Sexes	25-34 years	595	9257	516	288	35	858
2021-03-31	2020-01-01	2021-03-27	By Total			California	All Sexes	30-39 years	1009	10975	803	508	40	1342
2021-03-31	2020-01-01	2021-03-27	By Total			California	All Sexes	35-44 years	1575	12911	1313	867	45	2064
2021-03-31	2020-01-01	2021-03-27	By Total			California	All Sexes	40-49 years	2615	16557	2181	1518	56	3334
2021-03-31	2020-01-01	2021-03-27	By Total			California	All Sexes	45-54 years	4162	24057	3495	2487	81	5251
2021-03-31	2020-01-01	2021-03-27	By Total			California	All Sexes	50-64 years	11913	67268	10575	7408	204	15279
2021-03-31	2020-01-01	2021-03-27	By Total			California	All Sexes	55-64 years	9400	52734	8426	5883	155	12093
2021-03-31	2020-01-01	2021-03-27	By Total			California	All Sexes	65-74 years	13579	77670	12902	8544	170	18099
2021-03-31	2020-01-01	2021-03-27	By Total			California	All Sexes	75-84 years	14918	93620	14698	9133	173	20652
2021-03-31	2020-01-01	2021-03-27	By Total			California	All Sexes	85 years and over	15847	127655	15302	8285	164	23027
2021-03-31	2020-01-01	2021-03-27	By Total			California	Male	All Ages	35500	219153	33162	21476	436	47609
2021-03-31	2020-01-01	2021-03-27	By Total			California	Male	Under 1 year		1071	21		0	23	One or more data cells have counts between 1-9 and have been suppressed in accordance with NCHS confidentiality standards.
2021-03-31	2020-01-01	2021-03-27	By Total			California	Male	0-17 years	13	2082	44		12	66	One or more data cells have counts between 1-9 and have been suppressed in accordance with NCHS confidentiality standards.
2021-03-31	2020-01-01	2021-03-27	By Total			California	Male	1-4 years		213		0		15	One or more data cells have counts between 1-9 and have been suppressed in accordance with NCHS confidentiality standards.
2021-03-31	2020-01-01	2021-03-27	By Total			California	Male	5-14 years		355	11			19	One or more data cells have counts between 1-9 and have been suppressed in accordance with NCHS confidentiality standards.
2021-03-31	2020-01-01	2021-03-27	By Total			California	Male	15-24 years	74	3459	80	38		118	One or more data cells have counts between 1-9 and have been suppressed in accordance with NCHS confidentiality standards.
2021-03-31	2020-01-01	2021-03-27	By Total			California	Male	18-29 years	199	6115	199	92		314	One or more data cells have counts between 1-9 and have been suppressed in accordance with NCHS confidentiality standards.
2021-03-31	2020-01-01	2021-03-27	By Total			California	Male	25-34 years	393	6794	338	190	16	557
2021-03-31	2020-01-01	2021-03-27	By Total			California	Male	30-39 years	690	7787	540	353	19	895
2021-03-31	2020-01-01	2021-03-27	By Total			California	Male	35-44 years	1084	8828	859	586	23	1379
2021-03-31	2020-01-01	2021-03-27	By Total			California	Male	40-49 years	1825	10960	1442	1050	28	2245
2021-03-31	2020-01-01	2021-03-27	By Total			California	Male	45-54 years	2981	15686	2392	1780	45	3638
2021-03-31	2020-01-01	2021-03-27	By Total			California	Male	50-64 years	8262	43285	7032	5084	122	10327
2021-03-31	2020-01-01	2021-03-27	By Total			California	Male	55-64 years	6448	33823	5548	3985	92	8098
2021-03-31	2020-01-01	2021-03-27	By Total			California	Male	65-74 years	8784	46627	8124	5514	95	11483
2021-03-31	2020-01-01	2021-03-27	By Total			California	Male	75-84 years	8582	49880	8543	5378	77	11823
2021-03-31	2020-01-01	2021-03-27	By Total			California	Male	85 years and over	7145	52417	7238	4002	75	10456
2021-03-31	2020-01-01	2021-03-27	By Total			California	Female	All Ages	24710	186276	23677	14069	411	34722
2021-03-31	2020-01-01	2021-03-27	By Total			California	Female	Under 1 year		871		0			One or more data cells have counts between 1-9 and have been suppressed in accordance with NCHS confidentiality standards.
2021-03-31	2020-01-01	2021-03-27	By Total			California	Female	0-17 years		1481	30			45	One or more data cells have counts between 1-9 and have been suppressed in accordance with NCHS confidentiality standards.
2021-03-31	2020-01-01	2021-03-27	By Total			California	Female	1-4 years		154		0			One or more data cells have counts between 1-9 and have been suppressed in accordance with NCHS confidentiality standards.
2021-03-31	2020-01-01	2021-03-27	By Total			California	Female	5-14 years		274	16	0		20	One or more data cells have counts between 1-9 and have been suppressed in accordance with NCHS confidentiality standards.
2021-03-31	2020-01-01	2021-03-27	By Total			California	Female	15-24 years	48	1128	40	17		77	One or more data cells have counts between 1-9 and have been suppressed in accordance with NCHS confidentiality standards.
2021-03-31	2020-01-01	2021-03-27	By Total			California	Female	18-29 years	109	2006	105	53	12	173
2021-03-31	2020-01-01	2021-03-27	By Total			California	Female	25-34 years	202	2463	178	98	19	301
2021-03-31	2020-01-01	2021-03-27	By Total			California	Female	30-39 years	319	3188	263	155	21	447
2021-03-31	2020-01-01	2021-03-27	By Total			California	Female	35-44 years	491	4083	454	281	22	685
2021-03-31	2020-01-01	2021-03-27	By Total			California	Female	40-49 years	790	5597	739	468	28	1089
2021-03-31	2020-01-01	2021-03-27	By Total			California	Female	45-54 years	1181	8371	1103	707	36	1613
2021-03-31	2020-01-01	2021-03-27	By Total			California	Female	50-64 years	3651	23983	3543	2324	82	4952
2021-03-31	2020-01-01	2021-03-27	By Total			California	Female	55-64 years	2952	18911	2878	1898	63	3995
2021-03-31	2020-01-01	2021-03-27	By Total			California	Female	65-74 years	4795	31043	4778	3030	75	6616
2021-03-31	2020-01-01	2021-03-27	By Total			California	Female	75-84 years	6336	43740	6155	3755	96	8829
2021-03-31	2020-01-01	2021-03-27	By Total			California	Female	85 years and over	8702	75238	8064	4283	89	12571
2021-03-31	2020-01-01	2021-03-27	By Total			Colorado	All Sexes	All Ages	6238	57414	5500	3084	141	8790
2021-03-31	2020-01-01	2021-03-27	By Total			Colorado	All Sexes	Under 1 year		382		0			One or more data cells have counts between 1-9 and have been suppressed in accordance with NCHS confidentiality standards.
2021-03-31	2020-01-01	2021-03-27	By Total			Colorado	All Sexes	0-17 years		712				18	One or more data cells have counts between 1-9 and have been suppressed in accordance with NCHS confidentiality standards.
2021-03-31	2020-01-01	2021-03-27	By Total			Colorado	All Sexes	1-4 years	0	51		0			One or more data cells have counts between 1-9 and have been suppressed in accordance with NCHS confidentiality standards.
2021-03-31	2020-01-01	2021-03-27	By Total			Colorado	All Sexes	5-14 years		111		0			One or more data cells have counts between 1-9 and have been suppressed in accordance with NCHS confidentiality standards.
2021-03-31	2020-01-01	2021-03-27	By Total			Colorado	All Sexes	15-24 years	18	891	15			31	One or more data cells have counts between 1-9 and have been suppressed in accordance with NCHS confidentiality standards.
2021-03-31	2020-01-01	2021-03-27	By Total			Colorado	All Sexes	18-29 years	32	1479	28			55	One or more data cells have counts between 1-9 and have been suppressed in accordance with NCHS confidentiality standards.
2021-03-31	2020-01-01	2021-03-27	By Total			Colorado	All Sexes	25-34 years	32	1686	50	10		74	One or more data cells have counts between 1-9 and have been suppressed in accordance with NCHS confidentiality standards.
2021-03-31	2020-01-01	2021-03-27	By Total			Colorado	All Sexes	30-39 years	41	1981	89	22		117	One or more data cells have counts between 1-9 and have been suppressed in accordance with NCHS confidentiality standards.
2021-03-31	2020-01-01	2021-03-27	By Total			Colorado	All Sexes	35-44 years	80	2239	115	42		162	One or more data cells have counts between 1-9 and have been suppressed in accordance with NCHS confidentiality standards.
2021-03-31	2020-01-01	2021-03-27	By Total			Colorado	All Sexes	40-49 years	159	2599	158	76		247	One or more data cells have counts between 1-9 and have been suppressed in accordance with NCHS confidentiality standards.
2021-03-31	2020-01-01	2021-03-27	By Total			Colorado	All Sexes	45-54 years	273	3406	275	145	18	421
2021-03-31	2020-01-01	2021-03-27	By Total			Colorado	All Sexes	50-64 years	764	9108	821	420	44	1209
2021-03-31	2020-01-01	2021-03-27	By Total			Colorado	All Sexes	55-64 years	597	7113	643	327	31	944
2021-03-31	2020-01-01	2021-03-27	By Total			Colorado	All Sexes	65-74 years	1247	11067	1259	718	27	1813
2021-03-31	2020-01-01	2021-03-27	By Total			Colorado	All Sexes	75-84 years	1764	13310	1548	916	13	2408
2021-03-31	2020-01-01	2021-03-27	By Total			Colorado	All Sexes	85 years and over	2223	17158	1588	921	35	2923
2021-03-31	2020-01-01	2021-03-27	By Total			Colorado	Male	All Ages	3468	30659	3196	1885	70	4847
2021-03-31	2020-01-01	2021-03-27	By Total			Colorado	Male	Under 1 year		195	0	0			One or more data cells have counts between 1-9 and have been suppressed in accordance with NCHS confidentiality standards.
2021-03-31	2020-01-01	2021-03-27	By Total			Colorado	Male	0-17 years		422				10	One or more data cells have counts between 1-9 and have been suppressed in accordance with NCHS confidentiality standards.
2021-03-31	2020-01-01	2021-03-27	By Total			Colorado	Male	1-4 years	0	33		0			One or more data cells have counts between 1-9 and have been suppressed in accordance with NCHS confidentiality standards.
2021-03-31	2020-01-01	2021-03-27	By Total			Colorado	Male	5-14 years		76	0	0	0		One or more data cells have counts between 1-9 and have been suppressed in accordance with NCHS confidentiality standards.
2021-03-31	2020-01-01	2021-03-27	By Total			Colorado	Male	15-24 years	13	645				21	One or more data cells have counts between 1-9 and have been suppressed in accordance with NCHS confidentiality standards.
2021-03-31	2020-01-01	2021-03-27	By Total			Colorado	Male	18-29 years	24	1097	18			38	One or more data cells have counts between 1-9 and have been suppressed in accordance with NCHS confidentiality standards.
2021-03-31	2020-01-01	2021-03-27	By Total			Colorado	Male	25-34 years	21	1210	29			43	One or more data cells have counts between 1-9 and have been suppressed in accordance with NCHS confidentiality standards.
2021-03-31	2020-01-01	2021-03-27	By Total			Colorado	Male	30-39 years	30	1356	55	18		72	One or more data cells have counts between 1-9 and have been suppressed in accordance with NCHS confidentiality standards.
2021-03-31	2020-01-01	2021-03-27	By Total			Colorado	Male	35-44 years	52	1499	69	28		98	One or more data cells have counts between 1-9 and have been suppressed in accordance with NCHS confidentiality standards.
2021-03-31	2020-01-01	2021-03-27	By Total			Colorado	Male	40-49 years	112	1692	95	52		158	One or more data cells have counts between 1-9 and have been suppressed in accordance with NCHS confidentiality standards.
2021-03-31	2020-01-01	2021-03-27	By Total			Colorado	Male	45-54 years	198	2178	181	108	10	281
2021-03-31	2020-01-01	2021-03-27	By Total			Colorado	Male	50-64 years	526	5728	522	284	23	787
2021-03-31	2020-01-01	2021-03-27	By Total			Colorado	Male	55-64 years	410	4459	403	215	16	614
2021-03-31	2020-01-01	2021-03-27	By Total			Colorado	Male	65-74 years	810	6546	829	491	14	1162
2021-03-31	2020-01-01	2021-03-27	By Total			Colorado	Male	75-84 years	1008	7054	915	573		1354	One or more data cells have counts between 1-9 and have been suppressed in accordance with NCHS confidentiality standards.
2021-03-31	2020-01-01	2021-03-27	By Total			Colorado	Male	85 years and over	952	6764	759	458	15	1266
2021-03-31	2020-01-01	2021-03-27	By Total			Colorado	Female	All Ages	2770	26755	2304	1199	71	3943
2021-03-31	2020-01-01	2021-03-27	By Total			Colorado	Female	Under 1 year	0	187		0	0		One or more data cells have counts between 1-9 and have been suppressed in accordance with NCHS confidentiality standards.
2021-03-31	2020-01-01	2021-03-27	By Total			Colorado	Female	0-17 years		290					One or more data cells have counts between 1-9 and have been suppressed in accordance with NCHS confidentiality standards.
2021-03-31	2020-01-01	2021-03-27	By Total			Colorado	Female	1-4 years	0	18		0	0		One or more data cells have counts between 1-9 and have been suppressed in accordance with NCHS confidentiality standards.
2021-03-31	2020-01-01	2021-03-27	By Total			Colorado	Female	5-14 years	0	35		0			One or more data cells have counts between 1-9 and have been suppressed in accordance with NCHS confidentiality standards.
2021-03-31	2020-01-01	2021-03-27	By Total			Colorado	Female	15-24 years		246			0	10	One or more data cells have counts between 1-9 and have been suppressed in accordance with NCHS confidentiality standards.
2021-03-31	2020-01-01	2021-03-27	By Total			Colorado	Female	18-29 years		382	10		0	17	One or more data cells have counts between 1-9 and have been suppressed in accordance with NCHS confidentiality standards.
2021-03-31	2020-01-01	2021-03-27	By Total			Colorado	Female	25-34 years	11	476	21			31	One or more data cells have counts between 1-9 and have been suppressed in accordance with NCHS confidentiality standards.
2021-03-31	2020-01-01	2021-03-27	By Total			Colorado	Female	30-39 years	11	625	34			45	One or more data cells have counts between 1-9 and have been suppressed in accordance with NCHS confidentiality standards.
2021-03-31	2020-01-01	2021-03-27	By Total			Colorado	Female	35-44 years	28	740	46	14		64	One or more data cells have counts between 1-9 and have been suppressed in accordance with NCHS confidentiality standards.
2021-03-31	2020-01-01	2021-03-27	By Total			Colorado	Female	40-49 years	47	907	63	24		89	One or more data cells have counts between 1-9 and have been suppressed in accordance with NCHS confidentiality standards.
2021-03-31	2020-01-01	2021-03-27	By Total			Colorado	Female	45-54 years	75	1228	94	37		140	One or more data cells have counts between 1-9 and have been suppressed in accordance with NCHS confidentiality standards.
2021-03-31	2020-01-01	2021-03-27	By Total			Colorado	Female	50-64 years	238	3380	299	136	21	422
2021-03-31	2020-01-01	2021-03-27	By Total			Colorado	Female	55-64 years	187	2654	240	112	15	330
2021-03-31	2020-01-01	2021-03-27	By Total			Colorado	Female	65-74 years	437	4521	430	227	13	651
2021-03-31	2020-01-01	2021-03-27	By Total			Colorado	Female	75-84 years	756	6256	633	343		1054	One or more data cells have counts between 1-9 and have been suppressed in accordance with NCHS confidentiality standards.
2021-03-31	2020-01-01	2021-03-27	By Total			Colorado	Female	85 years and over	1271	10394	829	463	20	1657
2021-03-31	2020-01-01	2021-03-27	By Total			Connecticut	All Sexes	All Ages	7638	43836	3912	2134	92	9505
2021-03-31	2020-01-01	2021-03-27	By Total			Connecticut	All Sexes	Under 1 year		164	0	0	0		One or more data cells have counts between 1-9 and have been suppressed in accordance with NCHS confidentiality standards.
2021-03-31	2020-01-01	2021-03-27	By Total			Connecticut	All Sexes	0-17 years		265		0			One or more data cells have counts between 1-9 and have been suppressed in accordance with NCHS confidentiality standards.
2021-03-31	2020-01-01	2021-03-27	By Total			Connecticut	All Sexes	1-4 years	0	22		0			One or more data cells have counts between 1-9 and have been suppressed in accordance with NCHS confidentiality standards.
2021-03-31	2020-01-01	2021-03-27	By Total			Connecticut	All Sexes	5-14 years		34		0	0		One or more data cells have counts between 1-9 and have been suppressed in accordance with NCHS confidentiality standards.
2021-03-31	2020-01-01	2021-03-27	By Total			Connecticut	All Sexes	15-24 years		298			0		One or more data cells have counts between 1-9 and have been suppressed in accordance with NCHS confidentiality standards.
2021-03-31	2020-01-01	2021-03-27	By Total			Connecticut	All Sexes	18-29 years	11	576				18	One or more data cells have counts between 1-9 and have been suppressed in accordance with NCHS confidentiality standards.
2021-03-31	2020-01-01	2021-03-27	By Total			Connecticut	All Sexes	25-34 years	23	771	13			36	One or more data cells have counts between 1-9 and have been suppressed in accordance with NCHS confidentiality standards.
2021-03-31	2020-01-01	2021-03-27	By Total			Connecticut	All Sexes	30-39 years	36	986	18		0	52	One or more data cells have counts between 1-9 and have been suppressed in accordance with NCHS confidentiality standards.
2021-03-31	2020-01-01	2021-03-27	By Total			Connecticut	All Sexes	35-44 years	54	1098	38	10	0	82
2021-03-31	2020-01-01	2021-03-27	By Total			Connecticut	All Sexes	40-49 years	112	1365	64	26		152	One or more data cells have counts between 1-9 and have been suppressed in accordance with NCHS confidentiality standards.
2021-03-31	2020-01-01	2021-03-27	By Total			Connecticut	All Sexes	45-54 years	203	2093	111	60		261	One or more data cells have counts between 1-9 and have been suppressed in accordance with NCHS confidentiality standards.
2021-03-31	2020-01-01	2021-03-27	By Total			Connecticut	All Sexes	50-64 years	796	6173	461	256	19	1020
2021-03-31	2020-01-01	2021-03-27	By Total			Connecticut	All Sexes	55-64 years	671	4885	384	212	14	857
2021-03-31	2020-01-01	2021-03-27	By Total			Connecticut	All Sexes	65-74 years	1295	7242	765	426	18	1649
2021-03-31	2020-01-01	2021-03-27	By Total			Connecticut	All Sexes	75-84 years	2031	10347	1040	605	26	2492
2021-03-31	2020-01-01	2021-03-27	By Total			Connecticut	All Sexes	85 years and over	3355	16882	1554	817	23	4115
2021-03-31	2020-01-01	2021-03-27	By Total			Connecticut	Male	All Ages	3729	21915	2044	1143	46	4673
2021-03-31	2020-01-01	2021-03-27	By Total			Connecticut	Male	Under 1 year	0	98	0	0	0	0
2021-03-31	2020-01-01	2021-03-27	By Total			Connecticut	Male	0-17 years	0	159		0			One or more data cells have counts between 1-9 and have been suppressed in accordance with NCHS confidentiality standards.
2021-03-31	2020-01-01	2021-03-27	By Total			Connecticut	Male	1-4 years	0	11	0	0			One or more data cells have counts between 1-9 and have been suppressed in accordance with NCHS confidentiality standards.
2021-03-31	2020-01-01	2021-03-27	By Total			Connecticut	Male	5-14 years	0	19		0	0		One or more data cells have counts between 1-9 and have been suppressed in accordance with NCHS confidentiality standards.
2021-03-31	2020-01-01	2021-03-27	By Total			Connecticut	Male	15-24 years		219			0		One or more data cells have counts between 1-9 and have been suppressed in accordance with NCHS confidentiality standards.
2021-03-31	2020-01-01	2021-03-27	By Total			Connecticut	Male	18-29 years		441				12	One or more data cells have counts between 1-9 and have been suppressed in accordance with NCHS confidentiality standards.
2021-03-31	2020-01-01	2021-03-27	By Total			Connecticut	Male	25-34 years	14	581				22	One or more data cells have counts between 1-9 and have been suppressed in accordance with NCHS confidentiality standards.
2021-03-31	2020-01-01	2021-03-27	By Total			Connecticut	Male	30-39 years	23	709		0	0	31	One or more data cells have counts between 1-9 and have been suppressed in accordance with NCHS confidentiality standards.
2021-03-31	2020-01-01	2021-03-27	By Total			Connecticut	Male	35-44 years	35	732	22		0	50	One or more data cells have counts between 1-9 and have been suppressed in accordance with NCHS confidentiality standards.
2021-03-31	2020-01-01	2021-03-27	By Total			Connecticut	Male	40-49 years	71	875	40	16	0	95
2021-03-31	2020-01-01	2021-03-27	By Total			Connecticut	Male	45-54 years	141	1378	68	38		173	One or more data cells have counts between 1-9 and have been suppressed in accordance with NCHS confidentiality standards.
2021-03-31	2020-01-01	2021-03-27	By Total			Connecticut	Male	50-64 years	517	3903	277	164		639	One or more data cells have counts between 1-9 and have been suppressed in accordance with NCHS confidentiality standards.
2021-03-31	2020-01-01	2021-03-27	By Total			Connecticut	Male	55-64 years	427	3049	230	135		529	One or more data cells have counts between 1-9 and have been suppressed in accordance with NCHS confidentiality standards.
2021-03-31	2020-01-01	2021-03-27	By Total			Connecticut	Male	65-74 years	780	4167	449	262	14	978
2021-03-31	2020-01-01	2021-03-27	By Total			Connecticut	Male	75-84 years	1065	5292	557	325	11	1308
2021-03-31	2020-01-01	2021-03-27	By Total			Connecticut	Male	85 years and over	1264	6369	708	374	10	1608
2021-03-31	2020-01-01	2021-03-27	By Total			Connecticut	Female	All Ages	3909	21921	1868	991	46	4832
2021-03-31	2020-01-01	2021-03-27	By Total			Connecticut	Female	Under 1 year		66	0	0	0		One or more data cells have counts between 1-9 and have been suppressed in accordance with NCHS confidentiality standards.
2021-03-31	2020-01-01	2021-03-27	By Total			Connecticut	Female	0-17 years		106		0	0		One or more data cells have counts between 1-9 and have been suppressed in accordance with NCHS confidentiality standards.
2021-03-31	2020-01-01	2021-03-27	By Total			Connecticut	Female	1-4 years	0	11		0	0		One or more data cells have counts between 1-9 and have been suppressed in accordance with NCHS confidentiality standards.
2021-03-31	2020-01-01	2021-03-27	By Total			Connecticut	Female	5-14 years		15		0	0		One or more data cells have counts between 1-9 and have been suppressed in accordance with NCHS confidentiality standards.
2021-03-31	2020-01-01	2021-03-27	By Total			Connecticut	Female	15-24 years		79		0	0		One or more data cells have counts between 1-9 and have been suppressed in accordance with NCHS confidentiality standards.
2021-03-31	2020-01-01	2021-03-27	By Total			Connecticut	Female	18-29 years		135		0			One or more data cells have counts between 1-9 and have been suppressed in accordance with NCHS confidentiality standards.
2021-03-31	2020-01-01	2021-03-27	By Total			Connecticut	Female	25-34 years		190				14	One or more data cells have counts between 1-9 and have been suppressed in accordance with NCHS confidentiality standards.
2021-03-31	2020-01-01	2021-03-27	By Total			Connecticut	Female	30-39 years	13	277	10		0	21	One or more data cells have counts between 1-9 and have been suppressed in accordance with NCHS confidentiality standards.
2021-03-31	2020-01-01	2021-03-27	By Total			Connecticut	Female	35-44 years	19	366	16		0	32	One or more data cells have counts between 1-9 and have been suppressed in accordance with NCHS confidentiality standards.
2021-03-31	2020-01-01	2021-03-27	By Total			Connecticut	Female	40-49 years	41	490	24	10		57	One or more data cells have counts between 1-9 and have been suppressed in accordance with NCHS confidentiality standards.
2021-03-31	2020-01-01	2021-03-27	By Total			Connecticut	Female	45-54 years	62	715	43	22		88	One or more data cells have counts between 1-9 and have been suppressed in accordance with NCHS confidentiality standards.
2021-03-31	2020-01-01	2021-03-27	By Total			Connecticut	Female	50-64 years	279	2270	184	92	10	381
2021-03-31	2020-01-01	2021-03-27	By Total			Connecticut	Female	55-64 years	244	1836	154	77		328	One or more data cells have counts between 1-9 and have been suppressed in accordance with NCHS confidentiality standards.
2021-03-31	2020-01-01	2021-03-27	By Total			Connecticut	Female	65-74 years	515	3075	316	164		671	One or more data cells have counts between 1-9 and have been suppressed in accordance with NCHS confidentiality standards.
2021-03-31	2020-01-01	2021-03-27	By Total			Connecticut	Female	75-84 years	966	5055	483	280	15	1184
2021-03-31	2020-01-01	2021-03-27	By Total			Connecticut	Female	85 years and over	2091	10513	846	443	13	2507
2021-03-31	2020-01-01	2021-03-27	By Total			Delaware	All Sexes	All Ages	1397	13084	1107	632	22	1893
2021-03-31	2020-01-01	2021-03-27	By Total			Delaware	All Sexes	Under 1 year	0	72		0	0		One or more data cells have counts between 1-9 and have been suppressed in accordance with NCHS confidentiality standards.
2021-03-31	2020-01-01	2021-03-27	By Total			Delaware	All Sexes	0-17 years		128			0		One or more data cells have counts between 1-9 and have been suppressed in accordance with NCHS confidentiality standards.
2021-03-31	2020-01-01	2021-03-27	By Total			Delaware	All Sexes	1-4 years		13		0	0		One or more data cells have counts between 1-9 and have been suppressed in accordance with NCHS confidentiality standards.
2021-03-31	2020-01-01	2021-03-27	By Total			Delaware	All Sexes	5-14 years		19			0		One or more data cells have counts between 1-9 and have been suppressed in accordance with NCHS confidentiality standards.
2021-03-31	2020-01-01	2021-03-27	By Total			Delaware	All Sexes	15-24 years		135			0		One or more data cells have counts between 1-9 and have been suppressed in accordance with NCHS confidentiality standards.
2021-03-31	2020-01-01	2021-03-27	By Total			Delaware	All Sexes	18-29 years		216					One or more data cells have counts between 1-9 and have been suppressed in accordance with NCHS confidentiality standards.
2021-03-31	2020-01-01	2021-03-27	By Total			Delaware	All Sexes	25-34 years		264				14	One or more data cells have counts between 1-9 and have been suppressed in accordance with NCHS confidentiality standards.
2021-03-31	2020-01-01	2021-03-27	By Total			Delaware	All Sexes	30-39 years	12	335	12			17	One or more data cells have counts between 1-9 and have been suppressed in accordance with NCHS confidentiality standards.
2021-03-31	2020-01-01	2021-03-27	By Total			Delaware	All Sexes	35-44 years		366				13	One or more data cells have counts between 1-9 and have been suppressed in accordance with NCHS confidentiality standards.
2021-03-31	2020-01-01	2021-03-27	By Total			Delaware	All Sexes	40-49 years	22	436	14			29	One or more data cells have counts between 1-9 and have been suppressed in accordance with NCHS confidentiality standards.
2021-03-31	2020-01-01	2021-03-27	By Total			Delaware	All Sexes	45-54 years	53	641	45	26		73	One or more data cells have counts between 1-9 and have been suppressed in accordance with NCHS confidentiality standards.
2021-03-31	2020-01-01	2021-03-27	By Total			Delaware	All Sexes	50-64 years	183	1965	164	97		252	One or more data cells have counts between 1-9 and have been suppressed in accordance with NCHS confidentiality standards.
2021-03-31	2020-01-01	2021-03-27	By Total			Delaware	All Sexes	55-64 years	149	1570	131	79		203	One or more data cells have counts between 1-9 and have been suppressed in accordance with NCHS confidentiality standards.
2021-03-31	2020-01-01	2021-03-27	By Total			Delaware	All Sexes	65-74 years	265	2647	264	142		392	One or more data cells have counts between 1-9 and have been suppressed in accordance with NCHS confidentiality standards.
2021-03-31	2020-01-01	2021-03-27	By Total			Delaware	All Sexes	75-84 years	409	3355	343	198		558	One or more data cells have counts between 1-9 and have been suppressed in accordance with NCHS confidentiality standards.
2021-03-31	2020-01-01	2021-03-27	By Total			Delaware	All Sexes	85 years and over	496	4002	302	176		628	One or more data cells have counts between 1-9 and have been suppressed in accordance with NCHS confidentiality standards.
2021-03-31	2020-01-01	2021-03-27	By Total			Delaware	Male	All Ages	699	6739	565	345		926	One or more data cells have counts between 1-9 and have been suppressed in accordance with NCHS confidentiality standards.
2021-03-31	2020-01-01	2021-03-27	By Total			Delaware	Male	Under 1 year	0	37	0	0	0	0
2021-03-31	2020-01-01	2021-03-27	By Total			Delaware	Male	0-17 years		71			0		One or more data cells have counts between 1-9 and have been suppressed in accordance with NCHS confidentiality standards.
2021-03-31	2020-01-01	2021-03-27	By Total			Delaware	Male	1-4 years				0	0		One or more data cells have counts between 1-9 and have been suppressed in accordance with NCHS confidentiality standards.
2021-03-31	2020-01-01	2021-03-27	By Total			Delaware	Male	5-14 years					0		One or more data cells have counts between 1-9 and have been suppressed in accordance with NCHS confidentiality standards.
2021-03-31	2020-01-01	2021-03-27	By Total			Delaware	Male	15-24 years		98		0	0		One or more data cells have counts between 1-9 and have been suppressed in accordance with NCHS confidentiality standards.
2021-03-31	2020-01-01	2021-03-27	By Total			Delaware	Male	18-29 years		162		0			One or more data cells have counts between 1-9 and have been suppressed in accordance with NCHS confidentiality standards.
2021-03-31	2020-01-01	2021-03-27	By Total			Delaware	Male	25-34 years		207					One or more data cells have counts between 1-9 and have been suppressed in accordance with NCHS confidentiality standards.
2021-03-31	2020-01-01	2021-03-27	By Total			Delaware	Male	30-39 years		243			0		One or more data cells have counts between 1-9 and have been suppressed in accordance with NCHS confidentiality standards.
2021-03-31	2020-01-01	2021-03-27	By Total			Delaware	Male	35-44 years		230			0		One or more data cells have counts between 1-9 and have been suppressed in accordance with NCHS confidentiality standards.
2021-03-31	2020-01-01	2021-03-27	By Total			Delaware	Male	40-49 years	14	277	11		0	19	One or more data cells have counts between 1-9 and have been suppressed in accordance with NCHS confidentiality standards.
2021-03-31	2020-01-01	2021-03-27	By Total			Delaware	Male	45-54 years	28	420	26	16	0	38
2021-03-31	2020-01-01	2021-03-27	By Total			Delaware	Male	50-64 years	102	1190	89	55	0	136
2021-03-31	2020-01-01	2021-03-27	By Total			Delaware	Male	55-64 years	86	935	73	45	0	114
2021-03-31	2020-01-01	2021-03-27	By Total			Delaware	Male	65-74 years	154	1490	145	85		215	One or more data cells have counts between 1-9 and have been suppressed in accordance with NCHS confidentiality standards.
2021-03-31	2020-01-01	2021-03-27	By Total			Delaware	Male	75-84 years	227	1741	182	113		299	One or more data cells have counts between 1-9 and have been suppressed in accordance with NCHS confidentiality standards.
2021-03-31	2020-01-01	2021-03-27	By Total			Delaware	Male	85 years and over	191	1565	130	82		240	One or more data cells have counts between 1-9 and have been suppressed in accordance with NCHS confidentiality standards.
2021-03-31	2020-01-01	2021-03-27	By Total			Delaware	Female	All Ages	698	6345	542	287	14	967
2021-03-31	2020-01-01	2021-03-27	By Total			Delaware	Female	Under 1 year	0	35		0	0		One or more data cells have counts between 1-9 and have been suppressed in accordance with NCHS confidentiality standards.
2021-03-31	2020-01-01	2021-03-27	By Total			Delaware	Female	0-17 years	0	57		0	0		One or more data cells have counts between 1-9 and have been suppressed in accordance with NCHS confidentiality standards.
2021-03-31	2020-01-01	2021-03-27	By Total			Delaware	Female	1-4 years	0		0	0	0	0	One or more data cells have counts between 1-9 and have been suppressed in accordance with NCHS confidentiality standards.
2021-03-31	2020-01-01	2021-03-27	By Total			Delaware	Female	5-14 years	0	11		0	0		One or more data cells have counts between 1-9 and have been suppressed in accordance with NCHS confidentiality standards.
2021-03-31	2020-01-01	2021-03-27	By Total			Delaware	Female	15-24 years		37			0		One or more data cells have counts between 1-9 and have been suppressed in accordance with NCHS confidentiality standards.
2021-03-31	2020-01-01	2021-03-27	By Total			Delaware	Female	18-29 years		54			0		One or more data cells have counts between 1-9 and have been suppressed in accordance with NCHS confidentiality standards.
2021-03-31	2020-01-01	2021-03-27	By Total			Delaware	Female	25-34 years		57			0		One or more data cells have counts between 1-9 and have been suppressed in accordance with NCHS confidentiality standards.
2021-03-31	2020-01-01	2021-03-27	By Total			Delaware	Female	30-39 years		92				11	One or more data cells have counts between 1-9 and have been suppressed in accordance with NCHS confidentiality standards.
2021-03-31	2020-01-01	2021-03-27	By Total			Delaware	Female	35-44 years		136					One or more data cells have counts between 1-9 and have been suppressed in accordance with NCHS confidentiality standards.
2021-03-31	2020-01-01	2021-03-27	By Total			Delaware	Female	40-49 years		159				10	One or more data cells have counts between 1-9 and have been suppressed in accordance with NCHS confidentiality standards.
2021-03-31	2020-01-01	2021-03-27	By Total			Delaware	Female	45-54 years	25	221	19	10		35	One or more data cells have counts between 1-9 and have been suppressed in accordance with NCHS confidentiality standards.
2021-03-31	2020-01-01	2021-03-27	By Total			Delaware	Female	50-64 years	81	775	75	42		116	One or more data cells have counts between 1-9 and have been suppressed in accordance with NCHS confidentiality standards.
2021-03-31	2020-01-01	2021-03-27	By Total			Delaware	Female	55-64 years	63	635	58	34		89	One or more data cells have counts between 1-9 and have been suppressed in accordance with NCHS confidentiality standards.
2021-03-31	2020-01-01	2021-03-27	By Total			Delaware	Female	65-74 years	111	1157	119	57		177	One or more data cells have counts between 1-9 and have been suppressed in accordance with NCHS confidentiality standards.
2021-03-31	2020-01-01	2021-03-27	By Total			Delaware	Female	75-84 years	182	1614	161	85		259	One or more data cells have counts between 1-9 and have been suppressed in accordance with NCHS confidentiality standards.
2021-03-31	2020-01-01	2021-03-27	By Total			Delaware	Female	85 years and over	305	2437	172	94		388	One or more data cells have counts between 1-9 and have been suppressed in accordance with NCHS confidentiality standards.
2021-03-31	2020-01-01	2021-03-27	By Total			District of Columbia	All Sexes	All Ages	1322	8941	1594	1124	12	1804
2021-03-31	2020-01-01	2021-03-27	By Total			District of Columbia	All Sexes	Under 1 year		122		0			One or more data cells have counts between 1-9 and have been suppressed in accordance with NCHS confidentiality standards.
2021-03-31	2020-01-01	2021-03-27	By Total			District of Columbia	All Sexes	0-17 years		208				10	One or more data cells have counts between 1-9 and have been suppressed in accordance with NCHS confidentiality standards.
2021-03-31	2020-01-01	2021-03-27	By Total			District of Columbia	All Sexes	1-4 years		33					One or more data cells have counts between 1-9 and have been suppressed in accordance with NCHS confidentiality standards.
2021-03-31	2020-01-01	2021-03-27	By Total			District of Columbia	All Sexes	5-14 years	0	33		0			One or more data cells have counts between 1-9 and have been suppressed in accordance with NCHS confidentiality standards.
2021-03-31	2020-01-01	2021-03-27	By Total			District of Columbia	All Sexes	15-24 years		145			0		One or more data cells have counts between 1-9 and have been suppressed in accordance with NCHS confidentiality standards.
2021-03-31	2020-01-01	2021-03-27	By Total			District of Columbia	All Sexes	18-29 years	10	249	17		0	18	One or more data cells have counts between 1-9 and have been suppressed in accordance with NCHS confidentiality standards.
2021-03-31	2020-01-01	2021-03-27	By Total			District of Columbia	All Sexes	25-34 years	16	295	24	15	0	25
2021-03-31	2020-01-01	2021-03-27	By Total			District of Columbia	All Sexes	30-39 years	28	359	33	24		38	One or more data cells have counts between 1-9 and have been suppressed in accordance with NCHS confidentiality standards.
2021-03-31	2020-01-01	2021-03-27	By Total			District of Columbia	All Sexes	35-44 years	39	417	44	33		51	One or more data cells have counts between 1-9 and have been suppressed in accordance with NCHS confidentiality standards.
2021-03-31	2020-01-01	2021-03-27	By Total			District of Columbia	All Sexes	40-49 years	61	493	76	54		84	One or more data cells have counts between 1-9 and have been suppressed in accordance with NCHS confidentiality standards.
2021-03-31	2020-01-01	2021-03-27	By Total			District of Columbia	All Sexes	45-54 years	111	697	126	96		142	One or more data cells have counts between 1-9 and have been suppressed in accordance with NCHS confidentiality standards.
2021-03-31	2020-01-01	2021-03-27	By Total			District of Columbia	All Sexes	50-64 years	320	2128	366	265		422	One or more data cells have counts between 1-9 and have been suppressed in accordance with NCHS confidentiality standards.
2021-03-31	2020-01-01	2021-03-27	By Total			District of Columbia	All Sexes	55-64 years	251	1695	294	207		339	One or more data cells have counts between 1-9 and have been suppressed in accordance with NCHS confidentiality standards.
2021-03-31	2020-01-01	2021-03-27	By Total			District of Columbia	All Sexes	65-74 years	358	2039	438	311		488	One or more data cells have counts between 1-9 and have been suppressed in accordance with NCHS confidentiality standards.
2021-03-31	2020-01-01	2021-03-27	By Total			District of Columbia	All Sexes	75-84 years	277	1660	339	237	0	379
2021-03-31	2020-01-01	2021-03-27	By Total			District of Columbia	All Sexes	85 years and over	266	1805	319	223		365	One or more data cells have counts between 1-9 and have been suppressed in accordance with NCHS confidentiality standards.
2021-03-31	2020-01-01	2021-03-27	By Total			District of Columbia	Male	All Ages	762	4920	904	652		1021	One or more data cells have counts between 1-9 and have been suppressed in accordance with NCHS confidentiality standards.
2021-03-31	2020-01-01	2021-03-27	By Total			District of Columbia	Male	Under 1 year		71		0	0		One or more data cells have counts between 1-9 and have been suppressed in accordance with NCHS confidentiality standards.
2021-03-31	2020-01-01	2021-03-27	By Total			District of Columbia	Male	0-17 years		120			0		One or more data cells have counts between 1-9 and have been suppressed in accordance with NCHS confidentiality standards.
2021-03-31	2020-01-01	2021-03-27	By Total			District of Columbia	Male	1-4 years		16			0		One or more data cells have counts between 1-9 and have been suppressed in accordance with NCHS confidentiality standards.
2021-03-31	2020-01-01	2021-03-27	By Total			District of Columbia	Male	5-14 years	0	14		0	0		One or more data cells have counts between 1-9 and have been suppressed in accordance with NCHS confidentiality standards.
2021-03-31	2020-01-01	2021-03-27	By Total			District of Columbia	Male	15-24 years		120		0	0		One or more data cells have counts between 1-9 and have been suppressed in accordance with NCHS confidentiality standards.
2021-03-31	2020-01-01	2021-03-27	By Total			District of Columbia	Male	18-29 years		190			0	10	One or more data cells have counts between 1-9 and have been suppressed in accordance with NCHS confidentiality standards.
2021-03-31	2020-01-01	2021-03-27	By Total			District of Columbia	Male	25-34 years		216	14		0	15	One or more data cells have counts between 1-9 and have been suppressed in accordance with NCHS confidentiality standards.
2021-03-31	2020-01-01	2021-03-27	By Total			District of Columbia	Male	30-39 years	23	264	26	19		31	One or more data cells have counts between 1-9 and have been suppressed in accordance with NCHS confidentiality standards.
2021-03-31	2020-01-01	2021-03-27	By Total			District of Columbia	Male	35-44 years	33	293	33	27		40	One or more data cells have counts between 1-9 and have been suppressed in accordance with NCHS confidentiality standards.
2021-03-31	2020-01-01	2021-03-27	By Total			District of Columbia	Male	40-49 years	44	320	48	38		55	One or more data cells have counts between 1-9 and have been suppressed in accordance with NCHS confidentiality standards.
2021-03-31	2020-01-01	2021-03-27	By Total			District of Columbia	Male	45-54 years	80	441	85	70		96	One or more data cells have counts between 1-9 and have been suppressed in accordance with NCHS confidentiality standards.
2021-03-31	2020-01-01	2021-03-27	By Total			District of Columbia	Male	50-64 years	206	1305	238	174		271	One or more data cells have counts between 1-9 and have been suppressed in accordance with NCHS confidentiality standards.
2021-03-31	2020-01-01	2021-03-27	By Total			District of Columbia	Male	55-64 years	155	1028	186	130		212	One or more data cells have counts between 1-9 and have been suppressed in accordance with NCHS confidentiality standards.
2021-03-31	2020-01-01	2021-03-27	By Total			District of Columbia	Male	65-74 years	216	1193	265	192		291	One or more data cells have counts between 1-9 and have been suppressed in accordance with NCHS confidentiality standards.
2021-03-31	2020-01-01	2021-03-27	By Total			District of Columbia	Male	75-84 years	159	862	194	138	0	215
2021-03-31	2020-01-01	2021-03-27	By Total			District of Columbia	Male	85 years and over	107	666	119	86		142	One or more data cells have counts between 1-9 and have been suppressed in accordance with NCHS confidentiality standards.
2021-03-31	2020-01-01	2021-03-27	By Total			District of Columbia	Female	All Ages	560	4021	690	472		783	One or more data cells have counts between 1-9 and have been suppressed in accordance with NCHS confidentiality standards.
2021-03-31	2020-01-01	2021-03-27	By Total			District of Columbia	Female	Under 1 year	0	51	0	0			One or more data cells have counts between 1-9 and have been suppressed in accordance with NCHS confidentiality standards.
2021-03-31	2020-01-01	2021-03-27	By Total			District of Columbia	Female	0-17 years	0	88		0			One or more data cells have counts between 1-9 and have been suppressed in accordance with NCHS confidentiality standards.
2021-03-31	2020-01-01	2021-03-27	By Total			District of Columbia	Female	1-4 years	0	17		0			One or more data cells have counts between 1-9 and have been suppressed in accordance with NCHS confidentiality standards.
2021-03-31	2020-01-01	2021-03-27	By Total			District of Columbia	Female	5-14 years	0	19	0	0			One or more data cells have counts between 1-9 and have been suppressed in accordance with NCHS confidentiality standards.
2021-03-31	2020-01-01	2021-03-27	By Total			District of Columbia	Female	15-24 years		25			0		One or more data cells have counts between 1-9 and have been suppressed in accordance with NCHS confidentiality standards.
2021-03-31	2020-01-01	2021-03-27	By Total			District of Columbia	Female	18-29 years		59			0		One or more data cells have counts between 1-9 and have been suppressed in accordance with NCHS confidentiality standards.
2021-03-31	2020-01-01	2021-03-27	By Total			District of Columbia	Female	25-34 years		79	10		0	10	One or more data cells have counts between 1-9 and have been suppressed in accordance with NCHS confidentiality standards.
2021-03-31	2020-01-01	2021-03-27	By Total			District of Columbia	Female	30-39 years		95			0		One or more data cells have counts between 1-9 and have been suppressed in accordance with NCHS confidentiality standards.
2021-03-31	2020-01-01	2021-03-27	By Total			District of Columbia	Female	35-44 years		124	11		0	11	One or more data cells have counts between 1-9 and have been suppressed in accordance with NCHS confidentiality standards.
2021-03-31	2020-01-01	2021-03-27	By Total			District of Columbia	Female	40-49 years	17	173	28	16	0	29
2021-03-31	2020-01-01	2021-03-27	By Total			District of Columbia	Female	45-54 years	31	256	41	26	0	46
2021-03-31	2020-01-01	2021-03-27	By Total			District of Columbia	Female	50-64 years	114	823	128	91	0	151
2021-03-31	2020-01-01	2021-03-27	By Total			District of Columbia	Female	55-64 years	96	667	108	77	0	127
2021-03-31	2020-01-01	2021-03-27	By Total			District of Columbia	Female	65-74 years	142	846	173	119		197	One or more data cells have counts between 1-9 and have been suppressed in accordance with NCHS confidentiality standards.
2021-03-31	2020-01-01	2021-03-27	By Total			District of Columbia	Female	75-84 years	118	798	145	99	0	164
2021-03-31	2020-01-01	2021-03-27	By Total			District of Columbia	Female	85 years and over	159	1139	200	137		223	One or more data cells have counts between 1-9 and have been suppressed in accordance with NCHS confidentiality standards.
2021-03-31	2020-01-01	2021-03-27	By Total			Florida	All Sexes	All Ages	30889	299836	34256	18637	505	46974
2021-03-31	2020-01-01	2021-03-27	By Total			Florida	All Sexes	Under 1 year	0	1440	15	0		18	One or more data cells have counts between 1-9 and have been suppressed in accordance with NCHS confidentiality standards.
2021-03-31	2020-01-01	2021-03-27	By Total			Florida	All Sexes	0-17 years	12	2517	44		11	64	One or more data cells have counts between 1-9 and have been suppressed in accordance with NCHS confidentiality standards.
2021-03-31	2020-01-01	2021-03-27	By Total			Florida	All Sexes	1-4 years		283	13	0		18	One or more data cells have counts between 1-9 and have been suppressed in accordance with NCHS confidentiality standards.
2021-03-31	2020-01-01	2021-03-27	By Total			Florida	All Sexes	5-14 years		420	11			19	One or more data cells have counts between 1-9 and have been suppressed in accordance with NCHS confidentiality standards.
2021-03-31	2020-01-01	2021-03-27	By Total			Florida	All Sexes	15-24 years	45	2699	58	20		88	One or more data cells have counts between 1-9 and have been suppressed in accordance with NCHS confidentiality standards.
2021-03-31	2020-01-01	2021-03-27	By Total			Florida	All Sexes	18-29 years	104	5028	156	54		212	One or more data cells have counts between 1-9 and have been suppressed in accordance with NCHS confidentiality standards.
2021-03-31	2020-01-01	2021-03-27	By Total			Florida	All Sexes	25-34 years	176	6125	252	104	15	336
2021-03-31	2020-01-01	2021-03-27	By Total			Florida	All Sexes	30-39 years	273	7490	351	151	23	495
2021-03-31	2020-01-01	2021-03-27	By Total			Florida	All Sexes	35-44 years	477	8744	540	266	23	774
2021-03-31	2020-01-01	2021-03-27	By Total			Florida	All Sexes	40-49 years	809	10749	854	489	38	1212
2021-03-31	2020-01-01	2021-03-27	By Total			Florida	All Sexes	45-54 years	1248	15365	1381	740	54	1940
2021-03-31	2020-01-01	2021-03-27	By Total			Florida	All Sexes	50-64 years	4230	46125	4849	2569	109	6613
2021-03-31	2020-01-01	2021-03-27	By Total			Florida	All Sexes	55-64 years	3475	36833	3984	2135	82	5403
2021-03-31	2020-01-01	2021-03-27	By Total			Florida	All Sexes	65-74 years	6791	58475	7710	4296	109	10306
2021-03-31	2020-01-01	2021-03-27	By Total			Florida	All Sexes	75-84 years	9435	76781	10373	5862	117	14055
2021-03-31	2020-01-01	2021-03-27	By Total			Florida	All Sexes	85 years and over	9235	92671	9919	5213	90	14017
2021-03-31	2020-01-01	2021-03-27	By Total			Florida	Male	All Ages	17585	161087	19652	10986	258	26489
2021-03-31	2020-01-01	2021-03-27	By Total			Florida	Male	Under 1 year	0	785		0			One or more data cells have counts between 1-9 and have been suppressed in accordance with NCHS confidentiality standards.
2021-03-31	2020-01-01	2021-03-27	By Total			Florida	Male	0-17 years		1465	23			31	One or more data cells have counts between 1-9 and have been suppressed in accordance with NCHS confidentiality standards.
2021-03-31	2020-01-01	2021-03-27	By Total			Florida	Male	1-4 years	0	159		0		11	One or more data cells have counts between 1-9 and have been suppressed in accordance with NCHS confidentiality standards.
2021-03-31	2020-01-01	2021-03-27	By Total			Florida	Male	5-14 years		262				10	One or more data cells have counts between 1-9 and have been suppressed in accordance with NCHS confidentiality standards.
2021-03-31	2020-01-01	2021-03-27	By Total			Florida	Male	15-24 years	25	1968	34			54	One or more data cells have counts between 1-9 and have been suppressed in accordance with NCHS confidentiality standards.
2021-03-31	2020-01-01	2021-03-27	By Total			Florida	Male	18-29 years	66	3642	89	32		128	One or more data cells have counts between 1-9 and have been suppressed in accordance with NCHS confidentiality standards.
2021-03-31	2020-01-01	2021-03-27	By Total			Florida	Male	25-34 years	109	4269	147	64		198	One or more data cells have counts between 1-9 and have been suppressed in accordance with NCHS confidentiality standards.
2021-03-31	2020-01-01	2021-03-27	By Total			Florida	Male	30-39 years	161	4985	208	90		287	One or more data cells have counts between 1-9 and have been suppressed in accordance with NCHS confidentiality standards.
2021-03-31	2020-01-01	2021-03-27	By Total			Florida	Male	35-44 years	304	5609	315	171	10	458
2021-03-31	2020-01-01	2021-03-27	By Total			Florida	Male	40-49 years	526	6761	509	319	21	737
2021-03-31	2020-01-01	2021-03-27	By Total			Florida	Male	45-54 years	803	9621	851	480	33	1205
2021-03-31	2020-01-01	2021-03-27	By Total			Florida	Male	50-64 years	2695	28609	2944	1638	64	4062
2021-03-31	2020-01-01	2021-03-27	By Total			Florida	Male	55-64 years	2210	22789	2405	1356	46	3304
2021-03-31	2020-01-01	2021-03-27	By Total			Florida	Male	65-74 years	4235	34733	4768	2737	56	6316
2021-03-31	2020-01-01	2021-03-27	By Total			Florida	Male	75-84 years	5535	41946	6113	3514	62	8191
2021-03-31	2020-01-01	2021-03-27	By Total			Florida	Male	85 years and over	4363	38946	4998	2655	35	6737
2021-03-31	2020-01-01	2021-03-27	By Total			Florida	Female	All Ages	13304	138749	14604	7651	247	20485
2021-03-31	2020-01-01	2021-03-27	By Total			Florida	Female	Under 1 year	0	655	11	0		13	One or more data cells have counts between 1-9 and have been suppressed in accordance with NCHS confidentiality standards.
2021-03-31	2020-01-01	2021-03-27	By Total			Florida	Female	0-17 years		1052	21			33	One or more data cells have counts between 1-9 and have been suppressed in accordance with NCHS confidentiality standards.
2021-03-31	2020-01-01	2021-03-27	By Total			Florida	Female	1-4 years		124		0			One or more data cells have counts between 1-9 and have been suppressed in accordance with NCHS confidentiality standards.
2021-03-31	2020-01-01	2021-03-27	By Total			Florida	Female	5-14 years		158		0			One or more data cells have counts between 1-9 and have been suppressed in accordance with NCHS confidentiality standards.
2021-03-31	2020-01-01	2021-03-27	By Total			Florida	Female	15-24 years	20	731	24	12		34	One or more data cells have counts between 1-9 and have been suppressed in accordance with NCHS confidentiality standards.
2021-03-31	2020-01-01	2021-03-27	By Total			Florida	Female	18-29 years	38	1386	67	22		84	One or more data cells have counts between 1-9 and have been suppressed in accordance with NCHS confidentiality standards.
2021-03-31	2020-01-01	2021-03-27	By Total			Florida	Female	25-34 years	67	1856	105	40		138	One or more data cells have counts between 1-9 and have been suppressed in accordance with NCHS confidentiality standards.
2021-03-31	2020-01-01	2021-03-27	By Total			Florida	Female	30-39 years	112	2505	143	61	14	208
2021-03-31	2020-01-01	2021-03-27	By Total			Florida	Female	35-44 years	173	3135	225	95	13	316
2021-03-31	2020-01-01	2021-03-27	By Total			Florida	Female	40-49 years	283	3988	345	170	17	475
2021-03-31	2020-01-01	2021-03-27	By Total			Florida	Female	45-54 years	445	5744	530	260	21	735
2021-03-31	2020-01-01	2021-03-27	By Total			Florida	Female	50-64 years	1535	17516	1905	931	45	2551
2021-03-31	2020-01-01	2021-03-27	By Total			Florida	Female	55-64 years	1265	14044	1579	779	36	2099
2021-03-31	2020-01-01	2021-03-27	By Total			Florida	Female	65-74 years	2556	23742	2942	1559	53	3990
2021-03-31	2020-01-01	2021-03-27	By Total			Florida	Female	75-84 years	3900	34835	4260	2348	55	5864
2021-03-31	2020-01-01	2021-03-27	By Total			Florida	Female	85 years and over	4872	53725	4921	2558	55	7280
2021-03-31	2020-01-01	2021-03-27	By Total			Georgia	All Sexes	All Ages	16140	126967	13770	8455	208	21655
2021-03-31	2020-01-01	2021-03-27	By Total			Georgia	All Sexes	Under 1 year		776		0	0		One or more data cells have counts between 1-9 and have been suppressed in accordance with NCHS confidentiality standards.
2021-03-31	2020-01-01	2021-03-27	By Total			Georgia	All Sexes	0-17 years	11	1441	15	0		31	One or more data cells have counts between 1-9 and have been suppressed in accordance with NCHS confidentiality standards.
2021-03-31	2020-01-01	2021-03-27	By Total			Georgia	All Sexes	1-4 years		175		0			One or more data cells have counts between 1-9 and have been suppressed in accordance with NCHS confidentiality standards.
2021-03-31	2020-01-01	2021-03-27	By Total			Georgia	All Sexes	5-14 years		275		0		12	One or more data cells have counts between 1-9 and have been suppressed in accordance with NCHS confidentiality standards.
2021-03-31	2020-01-01	2021-03-27	By Total			Georgia	All Sexes	15-24 years	32	1413	31			57	One or more data cells have counts between 1-9 and have been suppressed in accordance with NCHS confidentiality standards.
2021-03-31	2020-01-01	2021-03-27	By Total			Georgia	All Sexes	18-29 years	69	2448	68	26		117	One or more data cells have counts between 1-9 and have been suppressed in accordance with NCHS confidentiality standards.
2021-03-31	2020-01-01	2021-03-27	By Total			Georgia	All Sexes	25-34 years	128	2798	99	50		182	One or more data cells have counts between 1-9 and have been suppressed in accordance with NCHS confidentiality standards.
2021-03-31	2020-01-01	2021-03-27	By Total			Georgia	All Sexes	30-39 years	193	3425	162	83	10	280
2021-03-31	2020-01-01	2021-03-27	By Total			Georgia	All Sexes	35-44 years	308	4282	272	138	14	456
2021-03-31	2020-01-01	2021-03-27	By Total			Georgia	All Sexes	40-49 years	534	5815	460	255	17	756
2021-03-31	2020-01-01	2021-03-27	By Total			Georgia	All Sexes	45-54 years	896	8409	775	466	19	1224
2021-03-31	2020-01-01	2021-03-27	By Total			Georgia	All Sexes	50-64 years	2870	23958	2534	1544	52	3912
2021-03-31	2020-01-01	2021-03-27	By Total			Georgia	All Sexes	55-64 years	2305	18959	2049	1245	42	3151
2021-03-31	2020-01-01	2021-03-27	By Total			Georgia	All Sexes	65-74 years	4054	28010	3499	2214	54	5391
2021-03-31	2020-01-01	2021-03-27	By Total			Georgia	All Sexes	75-84 years	4694	31483	4055	2586	39	6201
2021-03-31	2020-01-01	2021-03-27	By Total			Georgia	All Sexes	85 years and over	3715	30387	2977	1747	24	4967
2021-03-31	2020-01-01	2021-03-27	By Total			Georgia	Male	All Ages	8706	65913	7557	4699	101	11660
2021-03-31	2020-01-01	2021-03-27	By Total			Georgia	Male	Under 1 year		421		0	0		One or more data cells have counts between 1-9 and have been suppressed in accordance with NCHS confidentiality standards.
2021-03-31	2020-01-01	2021-03-27	By Total			Georgia	Male	0-17 years		827		0		19	One or more data cells have counts between 1-9 and have been suppressed in accordance with NCHS confidentiality standards.
2021-03-31	2020-01-01	2021-03-27	By Total			Georgia	Male	1-4 years		92		0			One or more data cells have counts between 1-9 and have been suppressed in accordance with NCHS confidentiality standards.
2021-03-31	2020-01-01	2021-03-27	By Total			Georgia	Male	5-14 years		166		0	0		One or more data cells have counts between 1-9 and have been suppressed in accordance with NCHS confidentiality standards.
2021-03-31	2020-01-01	2021-03-27	By Total			Georgia	Male	15-24 years	18	1048	18			34	One or more data cells have counts between 1-9 and have been suppressed in accordance with NCHS confidentiality standards.
2021-03-31	2020-01-01	2021-03-27	By Total			Georgia	Male	18-29 years	36	1795	41	10		72	One or more data cells have counts between 1-9 and have been suppressed in accordance with NCHS confidentiality standards.
2021-03-31	2020-01-01	2021-03-27	By Total			Georgia	Male	25-34 years	68	1943	51	21		101	One or more data cells have counts between 1-9 and have been suppressed in accordance with NCHS confidentiality standards.
2021-03-31	2020-01-01	2021-03-27	By Total			Georgia	Male	30-39 years	110	2253	80	43		151	One or more data cells have counts between 1-9 and have been suppressed in accordance with NCHS confidentiality standards.
2021-03-31	2020-01-01	2021-03-27	By Total			Georgia	Male	35-44 years	183	2665	148	82		257	One or more data cells have counts between 1-9 and have been suppressed in accordance with NCHS confidentiality standards.
2021-03-31	2020-01-01	2021-03-27	By Total			Georgia	Male	40-49 years	313	3489	260	155		426	One or more data cells have counts between 1-9 and have been suppressed in accordance with NCHS confidentiality standards.
2021-03-31	2020-01-01	2021-03-27	By Total			Georgia	Male	45-54 years	549	5025	450	283		725	One or more data cells have counts between 1-9 and have been suppressed in accordance with NCHS confidentiality standards.
2021-03-31	2020-01-01	2021-03-27	By Total			Georgia	Male	50-64 years	1718	14367	1462	905	22	2297
2021-03-31	2020-01-01	2021-03-27	By Total			Georgia	Male	55-64 years	1362	11371	1177	723	17	1833
2021-03-31	2020-01-01	2021-03-27	By Total			Georgia	Male	65-74 years	2381	15942	2078	1328	26	3156
2021-03-31	2020-01-01	2021-03-27	By Total			Georgia	Male	75-84 years	2592	16006	2301	1466	18	3444
2021-03-31	2020-01-01	2021-03-27	By Total			Georgia	Male	85 years and over	1548	11234	1326	792	13	2095
2021-03-31	2020-01-01	2021-03-27	By Total			Georgia	Female	All Ages	7434	61054	6213	3756	107	9995
2021-03-31	2020-01-01	2021-03-27	By Total			Georgia	Female	Under 1 year	0	355		0	0		One or more data cells have counts between 1-9 and have been suppressed in accordance with NCHS confidentiality standards.
2021-03-31	2020-01-01	2021-03-27	By Total			Georgia	Female	0-17 years		614		0		12	One or more data cells have counts between 1-9 and have been suppressed in accordance with NCHS confidentiality standards.
2021-03-31	2020-01-01	2021-03-27	By Total			Georgia	Female	1-4 years	0	83		0			One or more data cells have counts between 1-9 and have been suppressed in accordance with NCHS confidentiality standards.
2021-03-31	2020-01-01	2021-03-27	By Total			Georgia	Female	5-14 years		109		0			One or more data cells have counts between 1-9 and have been suppressed in accordance with NCHS confidentiality standards.
2021-03-31	2020-01-01	2021-03-27	By Total			Georgia	Female	15-24 years	14	365	13			23	One or more data cells have counts between 1-9 and have been suppressed in accordance with NCHS confidentiality standards.
2021-03-31	2020-01-01	2021-03-27	By Total			Georgia	Female	18-29 years	33	653	27	16		45	One or more data cells have counts between 1-9 and have been suppressed in accordance with NCHS confidentiality standards.
2021-03-31	2020-01-01	2021-03-27	By Total			Georgia	Female	25-34 years	60	855	48	29		81	One or more data cells have counts between 1-9 and have been suppressed in accordance with NCHS confidentiality standards.
2021-03-31	2020-01-01	2021-03-27	By Total			Georgia	Female	30-39 years	83	1172	82	40		129	One or more data cells have counts between 1-9 and have been suppressed in accordance with NCHS confidentiality standards.
2021-03-31	2020-01-01	2021-03-27	By Total			Georgia	Female	35-44 years	125	1617	124	56		199	One or more data cells have counts between 1-9 and have been suppressed in accordance with NCHS confidentiality standards.
2021-03-31	2020-01-01	2021-03-27	By Total			Georgia	Female	40-49 years	221	2326	200	100		330	One or more data cells have counts between 1-9 and have been suppressed in accordance with NCHS confidentiality standards.
2021-03-31	2020-01-01	2021-03-27	By Total			Georgia	Female	45-54 years	347	3384	325	183	10	499
2021-03-31	2020-01-01	2021-03-27	By Total			Georgia	Female	50-64 years	1152	9591	1072	639	30	1615
2021-03-31	2020-01-01	2021-03-27	By Total			Georgia	Female	55-64 years	943	7588	872	522	25	1318
2021-03-31	2020-01-01	2021-03-27	By Total			Georgia	Female	65-74 years	1673	12068	1421	886	28	2235
2021-03-31	2020-01-01	2021-03-27	By Total			Georgia	Female	75-84 years	2102	15477	1754	1120	21	2757
2021-03-31	2020-01-01	2021-03-27	By Total			Georgia	Female	85 years and over	2167	19153	1651	955	11	2872
2021-03-31	2020-01-01	2021-03-27	By Total			Hawaii	All Sexes	All Ages	438	14649	1000	222	26	1242
2021-03-31	2020-01-01	2021-03-27	By Total			Hawaii	All Sexes	Under 1 year	0	97		0	0		One or more data cells have counts between 1-9 and have been suppressed in accordance with NCHS confidentiality standards.
2021-03-31	2020-01-01	2021-03-27	By Total			Hawaii	All Sexes	0-17 years	0	138		0		10	One or more data cells have counts between 1-9 and have been suppressed in accordance with NCHS confidentiality standards.
2021-03-31	2020-01-01	2021-03-27	By Total			Hawaii	All Sexes	1-4 years	0			0	0		One or more data cells have counts between 1-9 and have been suppressed in accordance with NCHS confidentiality standards.
2021-03-31	2020-01-01	2021-03-27	By Total			Hawaii	All Sexes	5-14 years	0	21		0			One or more data cells have counts between 1-9 and have been suppressed in accordance with NCHS confidentiality standards.
2021-03-31	2020-01-01	2021-03-27	By Total			Hawaii	All Sexes	15-24 years		112			0		One or more data cells have counts between 1-9 and have been suppressed in accordance with NCHS confidentiality standards.
2021-03-31	2020-01-01	2021-03-27	By Total			Hawaii	All Sexes	18-29 years		193			0	11	One or more data cells have counts between 1-9 and have been suppressed in accordance with NCHS confidentiality standards.
2021-03-31	2020-01-01	2021-03-27	By Total			Hawaii	All Sexes	25-34 years		233	11		0	12	One or more data cells have counts between 1-9 and have been suppressed in accordance with NCHS confidentiality standards.
2021-03-31	2020-01-01	2021-03-27	By Total			Hawaii	All Sexes	30-39 years		314	13		0	15	One or more data cells have counts between 1-9 and have been suppressed in accordance with NCHS confidentiality standards.
2021-03-31	2020-01-01	2021-03-27	By Total			Hawaii	All Sexes	35-44 years	13	396	19		0	27	One or more data cells have counts between 1-9 and have been suppressed in accordance with NCHS confidentiality standards.
2021-03-31	2020-01-01	2021-03-27	By Total			Hawaii	All Sexes	40-49 years	15	524	22		0	32	One or more data cells have counts between 1-9 and have been suppressed in accordance with NCHS confidentiality standards.
2021-03-31	2020-01-01	2021-03-27	By Total			Hawaii	All Sexes	45-54 years	24	779	36		0	51	One or more data cells have counts between 1-9 and have been suppressed in accordance with NCHS confidentiality standards.
2021-03-31	2020-01-01	2021-03-27	By Total			Hawaii	All Sexes	50-64 years	88	2240	138	45		185	One or more data cells have counts between 1-9 and have been suppressed in accordance with NCHS confidentiality standards.
2021-03-31	2020-01-01	2021-03-27	By Total			Hawaii	All Sexes	55-64 years	70	1764	112	38		148	One or more data cells have counts between 1-9 and have been suppressed in accordance with NCHS confidentiality standards.
2021-03-31	2020-01-01	2021-03-27	By Total			Hawaii	All Sexes	65-74 years	106	2866	199	58		254	One or more data cells have counts between 1-9 and have been suppressed in accordance with NCHS confidentiality standards.
2021-03-31	2020-01-01	2021-03-27	By Total			Hawaii	All Sexes	75-84 years	92	3109	221	49		271	One or more data cells have counts between 1-9 and have been suppressed in accordance with NCHS confidentiality standards.
2021-03-31	2020-01-01	2021-03-27	By Total			Hawaii	All Sexes	85 years and over	127	5265	390	60		464	One or more data cells have counts between 1-9 and have been suppressed in accordance with NCHS confidentiality standards.
2021-03-31	2020-01-01	2021-03-27	By Total			Hawaii	Male	All Ages	270	7918	585	141	16	730
2021-03-31	2020-01-01	2021-03-27	By Total			Hawaii	Male	Under 1 year	0	49		0	0		One or more data cells have counts between 1-9 and have been suppressed in accordance with NCHS confidentiality standards.
2021-03-31	2020-01-01	2021-03-27	By Total			Hawaii	Male	0-17 years	0	77		0			One or more data cells have counts between 1-9 and have been suppressed in accordance with NCHS confidentiality standards.
2021-03-31	2020-01-01	2021-03-27	By Total			Hawaii	Male	1-4 years	0		0	0	0	0	One or more data cells have counts between 1-9 and have been suppressed in accordance with NCHS confidentiality standards.
2021-03-31	2020-01-01	2021-03-27	By Total			Hawaii	Male	5-14 years	0	14		0			One or more data cells have counts between 1-9 and have been suppressed in accordance with NCHS confidentiality standards.
2021-03-31	2020-01-01	2021-03-27	By Total			Hawaii	Male	15-24 years		83		0	0		One or more data cells have counts between 1-9 and have been suppressed in accordance with NCHS confidentiality standards.
2021-03-31	2020-01-01	2021-03-27	By Total			Hawaii	Male	18-29 years		134			0		One or more data cells have counts between 1-9 and have been suppressed in accordance with NCHS confidentiality standards.
2021-03-31	2020-01-01	2021-03-27	By Total			Hawaii	Male	25-34 years		162			0	10	One or more data cells have counts between 1-9 and have been suppressed in accordance with NCHS confidentiality standards.
2021-03-31	2020-01-01	2021-03-27	By Total			Hawaii	Male	30-39 years		227			0	10	One or more data cells have counts between 1-9 and have been suppressed in accordance with NCHS confidentiality standards.
2021-03-31	2020-01-01	2021-03-27	By Total			Hawaii	Male	35-44 years		281	10		0	15	One or more data cells have counts between 1-9 and have been suppressed in accordance with NCHS confidentiality standards.
2021-03-31	2020-01-01	2021-03-27	By Total			Hawaii	Male	40-49 years		352	14		0	20	One or more data cells have counts between 1-9 and have been suppressed in accordance with NCHS confidentiality standards.
2021-03-31	2020-01-01	2021-03-27	By Total			Hawaii	Male	45-54 years	18	508	23		0	35	One or more data cells have counts between 1-9 and have been suppressed in accordance with NCHS confidentiality standards.
2021-03-31	2020-01-01	2021-03-27	By Total			Hawaii	Male	50-64 years	59	1458	81	30		112	One or more data cells have counts between 1-9 and have been suppressed in accordance with NCHS confidentiality standards.
2021-03-31	2020-01-01	2021-03-27	By Total			Hawaii	Male	55-64 years	44	1148	65	25		86	One or more data cells have counts between 1-9 and have been suppressed in accordance with NCHS confidentiality standards.
2021-03-31	2020-01-01	2021-03-27	By Total			Hawaii	Male	65-74 years	79	1791	129	44		167	One or more data cells have counts between 1-9 and have been suppressed in accordance with NCHS confidentiality standards.
2021-03-31	2020-01-01	2021-03-27	By Total			Hawaii	Male	75-84 years	61	1787	150	33		184	One or more data cells have counts between 1-9 and have been suppressed in accordance with NCHS confidentiality standards.
2021-03-31	2020-01-01	2021-03-27	By Total			Hawaii	Male	85 years and over	57	2092	192	30		223	One or more data cells have counts between 1-9 and have been suppressed in accordance with NCHS confidentiality standards.
2021-03-31	2020-01-01	2021-03-27	By Total			Hawaii	Female	All Ages	168	6731	415	81	10	512
2021-03-31	2020-01-01	2021-03-27	By Total			Hawaii	Female	Under 1 year	0	48		0	0		One or more data cells have counts between 1-9 and have been suppressed in accordance with NCHS confidentiality standards.
2021-03-31	2020-01-01	2021-03-27	By Total			Hawaii	Female	0-17 years	0	61		0	0		One or more data cells have counts between 1-9 and have been suppressed in accordance with NCHS confidentiality standards.
2021-03-31	2020-01-01	2021-03-27	By Total			Hawaii	Female	1-4 years	0			0	0		One or more data cells have counts between 1-9 and have been suppressed in accordance with NCHS confidentiality standards.
2021-03-31	2020-01-01	2021-03-27	By Total			Hawaii	Female	5-14 years	0			0	0		One or more data cells have counts between 1-9 and have been suppressed in accordance with NCHS confidentiality standards.
2021-03-31	2020-01-01	2021-03-27	By Total			Hawaii	Female	15-24 years		29			0		One or more data cells have counts between 1-9 and have been suppressed in accordance with NCHS confidentiality standards.
2021-03-31	2020-01-01	2021-03-27	By Total			Hawaii	Female	18-29 years		59			0		One or more data cells have counts between 1-9 and have been suppressed in accordance with NCHS confidentiality standards.
2021-03-31	2020-01-01	2021-03-27	By Total			Hawaii	Female	25-34 years		71			0		One or more data cells have counts between 1-9 and have been suppressed in accordance with NCHS confidentiality standards.
2021-03-31	2020-01-01	2021-03-27	By Total			Hawaii	Female	30-39 years		87			0		One or more data cells have counts between 1-9 and have been suppressed in accordance with NCHS confidentiality standards.
2021-03-31	2020-01-01	2021-03-27	By Total			Hawaii	Female	35-44 years		115			0	12	One or more data cells have counts between 1-9 and have been suppressed in accordance with NCHS confidentiality standards.
2021-03-31	2020-01-01	2021-03-27	By Total			Hawaii	Female	40-49 years		172			0	12	One or more data cells have counts between 1-9 and have been suppressed in accordance with NCHS confidentiality standards.
2021-03-31	2020-01-01	2021-03-27	By Total			Hawaii	Female	45-54 years		271	13		0	16	One or more data cells have counts between 1-9 and have been suppressed in accordance with NCHS confidentiality standards.
2021-03-31	2020-01-01	2021-03-27	By Total			Hawaii	Female	50-64 years	29	782	57	15		73	One or more data cells have counts between 1-9 and have been suppressed in accordance with NCHS confidentiality standards.
2021-03-31	2020-01-01	2021-03-27	By Total			Hawaii	Female	55-64 years	26	616	47	13		62	One or more data cells have counts between 1-9 and have been suppressed in accordance with NCHS confidentiality standards.
2021-03-31	2020-01-01	2021-03-27	By Total			Hawaii	Female	65-74 years	27	1075	70	14		87	One or more data cells have counts between 1-9 and have been suppressed in accordance with NCHS confidentiality standards.
2021-03-31	2020-01-01	2021-03-27	By Total			Hawaii	Female	75-84 years	31	1322	71	16		87	One or more data cells have counts between 1-9 and have been suppressed in accordance with NCHS confidentiality standards.
2021-03-31	2020-01-01	2021-03-27	By Total			Hawaii	Female	85 years and over	70	3173	198	30		241	One or more data cells have counts between 1-9 and have been suppressed in accordance with NCHS confidentiality standards.
2021-03-31	2020-01-01	2021-03-27	By Total			Idaho	All Sexes	All Ages	1951	19882	1560	866	35	2676
2021-03-31	2020-01-01	2021-03-27	By Total			Idaho	All Sexes	Under 1 year	0	105	0	0	0	0
2021-03-31	2020-01-01	2021-03-27	By Total			Idaho	All Sexes	0-17 years	0	223		0	0		One or more data cells have counts between 1-9 and have been suppressed in accordance with NCHS confidentiality standards.
2021-03-31	2020-01-01	2021-03-27	By Total			Idaho	All Sexes	1-4 years	0	24		0	0		One or more data cells have counts between 1-9 and have been suppressed in accordance with NCHS confidentiality standards.
2021-03-31	2020-01-01	2021-03-27	By Total			Idaho	All Sexes	5-14 years	0	36		0	0		One or more data cells have counts between 1-9 and have been suppressed in accordance with NCHS confidentiality standards.
2021-03-31	2020-01-01	2021-03-27	By Total			Idaho	All Sexes	15-24 years		233					One or more data cells have counts between 1-9 and have been suppressed in accordance with NCHS confidentiality standards.
2021-03-31	2020-01-01	2021-03-27	By Total			Idaho	All Sexes	18-29 years		327				10	One or more data cells have counts between 1-9 and have been suppressed in accordance with NCHS confidentiality standards.
2021-03-31	2020-01-01	2021-03-27	By Total			Idaho	All Sexes	25-34 years		355			0		One or more data cells have counts between 1-9 and have been suppressed in accordance with NCHS confidentiality standards.
2021-03-31	2020-01-01	2021-03-27	By Total			Idaho	All Sexes	30-39 years	10	469				15	One or more data cells have counts between 1-9 and have been suppressed in accordance with NCHS confidentiality standards.
2021-03-31	2020-01-01	2021-03-27	By Total			Idaho	All Sexes	35-44 years	20	549	14			28	One or more data cells have counts between 1-9 and have been suppressed in accordance with NCHS confidentiality standards.
2021-03-31	2020-01-01	2021-03-27	By Total			Idaho	All Sexes	40-49 years	37	664	24	14		49	One or more data cells have counts between 1-9 and have been suppressed in accordance with NCHS confidentiality standards.
2021-03-31	2020-01-01	2021-03-27	By Total			Idaho	All Sexes	45-54 years	59	904	54	27		87	One or more data cells have counts between 1-9 and have been suppressed in accordance with NCHS confidentiality standards.
2021-03-31	2020-01-01	2021-03-27	By Total			Idaho	All Sexes	50-64 years	198	2860	216	101		320	One or more data cells have counts between 1-9 and have been suppressed in accordance with NCHS confidentiality standards.
2021-03-31	2020-01-01	2021-03-27	By Total			Idaho	All Sexes	55-64 years	163	2337	178	83		265	One or more data cells have counts between 1-9 and have been suppressed in accordance with NCHS confidentiality standards.
2021-03-31	2020-01-01	2021-03-27	By Total			Idaho	All Sexes	65-74 years	416	3991	355	210	11	571
2021-03-31	2020-01-01	2021-03-27	By Total			Idaho	All Sexes	75-84 years	608	5280	484	278		817	One or more data cells have counts between 1-9 and have been suppressed in accordance with NCHS confidentiality standards.
2021-03-31	2020-01-01	2021-03-27	By Total			Idaho	All Sexes	85 years and over	678	6068	463	257		891	One or more data cells have counts between 1-9 and have been suppressed in accordance with NCHS confidentiality standards.
2021-03-31	2020-01-01	2021-03-27	By Total			Idaho	Male	All Ages	1143	10673	923	543	21	1541
2021-03-31	2020-01-01	2021-03-27	By Total			Idaho	Male	Under 1 year	0	59	0	0	0	0
2021-03-31	2020-01-01	2021-03-27	By Total			Idaho	Male	0-17 years	0	140		0	0		One or more data cells have counts between 1-9 and have been suppressed in accordance with NCHS confidentiality standards.
2021-03-31	2020-01-01	2021-03-27	By Total			Idaho	Male	1-4 years	0	16		0	0		One or more data cells have counts between 1-9 and have been suppressed in accordance with NCHS confidentiality standards.
2021-03-31	2020-01-01	2021-03-27	By Total			Idaho	Male	5-14 years	0	28		0	0		One or more data cells have counts between 1-9 and have been suppressed in accordance with NCHS confidentiality standards.
2021-03-31	2020-01-01	2021-03-27	By Total			Idaho	Male	15-24 years		177			0		One or more data cells have counts between 1-9 and have been suppressed in accordance with NCHS confidentiality standards.
2021-03-31	2020-01-01	2021-03-27	By Total			Idaho	Male	18-29 years		242			0		One or more data cells have counts between 1-9 and have been suppressed in accordance with NCHS confidentiality standards.
2021-03-31	2020-01-01	2021-03-27	By Total			Idaho	Male	25-34 years		230			0		One or more data cells have counts between 1-9 and have been suppressed in accordance with NCHS confidentiality standards.
2021-03-31	2020-01-01	2021-03-27	By Total			Idaho	Male	30-39 years		304					One or more data cells have counts between 1-9 and have been suppressed in accordance with NCHS confidentiality standards.
2021-03-31	2020-01-01	2021-03-27	By Total			Idaho	Male	35-44 years	10	357				15	One or more data cells have counts between 1-9 and have been suppressed in accordance with NCHS confidentiality standards.
2021-03-31	2020-01-01	2021-03-27	By Total			Idaho	Male	40-49 years	22	421	13			30	One or more data cells have counts between 1-9 and have been suppressed in accordance with NCHS confidentiality standards.
2021-03-31	2020-01-01	2021-03-27	By Total			Idaho	Male	45-54 years	34	562	28	12		51	One or more data cells have counts between 1-9 and have been suppressed in accordance with NCHS confidentiality standards.
2021-03-31	2020-01-01	2021-03-27	By Total			Idaho	Male	50-64 years	123	1712	123	59		192	One or more data cells have counts between 1-9 and have been suppressed in accordance with NCHS confidentiality standards.
2021-03-31	2020-01-01	2021-03-27	By Total			Idaho	Male	55-64 years	104	1390	103	51		161	One or more data cells have counts between 1-9 and have been suppressed in accordance with NCHS confidentiality standards.
2021-03-31	2020-01-01	2021-03-27	By Total			Idaho	Male	65-74 years	264	2330	216	134		354	One or more data cells have counts between 1-9 and have been suppressed in accordance with NCHS confidentiality standards.
2021-03-31	2020-01-01	2021-03-27	By Total			Idaho	Male	75-84 years	394	2925	324	192		527	One or more data cells have counts between 1-9 and have been suppressed in accordance with NCHS confidentiality standards.
2021-03-31	2020-01-01	2021-03-27	By Total			Idaho	Male	85 years and over	331	2599	238	147		423	One or more data cells have counts between 1-9 and have been suppressed in accordance with NCHS confidentiality standards.
2021-03-31	2020-01-01	2021-03-27	By Total			Idaho	Female	All Ages	808	9209	637	323	14	1135
2021-03-31	2020-01-01	2021-03-27	By Total			Idaho	Female	Under 1 year	0	46	0	0	0	0
2021-03-31	2020-01-01	2021-03-27	By Total			Idaho	Female	0-17 years	0	83		0	0		One or more data cells have counts between 1-9 and have been suppressed in accordance with NCHS confidentiality standards.
2021-03-31	2020-01-01	2021-03-27	By Total			Idaho	Female	1-4 years	0		0	0	0	0	One or more data cells have counts between 1-9 and have been suppressed in accordance with NCHS confidentiality standards.
2021-03-31	2020-01-01	2021-03-27	By Total			Idaho	Female	5-14 years	0		0	0	0	0	One or more data cells have counts between 1-9 and have been suppressed in accordance with NCHS confidentiality standards.
2021-03-31	2020-01-01	2021-03-27	By Total			Idaho	Female	15-24 years	0	56		0			One or more data cells have counts between 1-9 and have been suppressed in accordance with NCHS confidentiality standards.
2021-03-31	2020-01-01	2021-03-27	By Total			Idaho	Female	18-29 years		85		0			One or more data cells have counts between 1-9 and have been suppressed in accordance with NCHS confidentiality standards.
2021-03-31	2020-01-01	2021-03-27	By Total			Idaho	Female	25-34 years		125		0	0		One or more data cells have counts between 1-9 and have been suppressed in accordance with NCHS confidentiality standards.
2021-03-31	2020-01-01	2021-03-27	By Total			Idaho	Female	30-39 years		165			0		One or more data cells have counts between 1-9 and have been suppressed in accordance with NCHS confidentiality standards.
2021-03-31	2020-01-01	2021-03-27	By Total			Idaho	Female	35-44 years	10	192			0	13	One or more data cells have counts between 1-9 and have been suppressed in accordance with NCHS confidentiality standards.
2021-03-31	2020-01-01	2021-03-27	By Total			Idaho	Female	40-49 years	15	243	11		0	19	One or more data cells have counts between 1-9 and have been suppressed in accordance with NCHS confidentiality standards.
2021-03-31	2020-01-01	2021-03-27	By Total			Idaho	Female	45-54 years	25	342	26	15	0	36
2021-03-31	2020-01-01	2021-03-27	By Total			Idaho	Female	50-64 years	75	1148	93	42		128	One or more data cells have counts between 1-9 and have been suppressed in accordance with NCHS confidentiality standards.
2021-03-31	2020-01-01	2021-03-27	By Total			Idaho	Female	55-64 years	59	947	75	32		104	One or more data cells have counts between 1-9 and have been suppressed in accordance with NCHS confidentiality standards.
2021-03-31	2020-01-01	2021-03-27	By Total			Idaho	Female	65-74 years	152	1661	139	76		217	One or more data cells have counts between 1-9 and have been suppressed in accordance with NCHS confidentiality standards.
2021-03-31	2020-01-01	2021-03-27	By Total			Idaho	Female	75-84 years	214	2355	160	86		290	One or more data cells have counts between 1-9 and have been suppressed in accordance with NCHS confidentiality standards.
2021-03-31	2020-01-01	2021-03-27	By Total			Idaho	Female	85 years and over	347	3469	225	110		468	One or more data cells have counts between 1-9 and have been suppressed in accordance with NCHS confidentiality standards.
2021-03-31	2020-01-01	2021-03-27	By Total			Illinois	All Sexes	All Ages	20422	156389	17680	10097	227	28225
2021-03-31	2020-01-01	2021-03-27	By Total			Illinois	All Sexes	Under 1 year		811			0	10	One or more data cells have counts between 1-9 and have been suppressed in accordance with NCHS confidentiality standards.
2021-03-31	2020-01-01	2021-03-27	By Total			Illinois	All Sexes	0-17 years		1407	22			31	One or more data cells have counts between 1-9 and have been suppressed in accordance with NCHS confidentiality standards.
2021-03-31	2020-01-01	2021-03-27	By Total			Illinois	All Sexes	1-4 years	0	141		0			One or more data cells have counts between 1-9 and have been suppressed in accordance with NCHS confidentiality standards.
2021-03-31	2020-01-01	2021-03-27	By Total			Illinois	All Sexes	5-14 years		228				10	One or more data cells have counts between 1-9 and have been suppressed in accordance with NCHS confidentiality standards.
2021-03-31	2020-01-01	2021-03-27	By Total			Illinois	All Sexes	15-24 years	32	1559	28	12		50	One or more data cells have counts between 1-9 and have been suppressed in accordance with NCHS confidentiality standards.
2021-03-31	2020-01-01	2021-03-27	By Total			Illinois	All Sexes	18-29 years	77	2821	71	31		121	One or more data cells have counts between 1-9 and have been suppressed in accordance with NCHS confidentiality standards.
2021-03-31	2020-01-01	2021-03-27	By Total			Illinois	All Sexes	25-34 years	139	3072	106	50		198	One or more data cells have counts between 1-9 and have been suppressed in accordance with NCHS confidentiality standards.
2021-03-31	2020-01-01	2021-03-27	By Total			Illinois	All Sexes	30-39 years	228	3590	181	97		316	One or more data cells have counts between 1-9 and have been suppressed in accordance with NCHS confidentiality standards.
2021-03-31	2020-01-01	2021-03-27	By Total			Illinois	All Sexes	35-44 years	343	4385	270	142		479	One or more data cells have counts between 1-9 and have been suppressed in accordance with NCHS confidentiality standards.
2021-03-31	2020-01-01	2021-03-27	By Total			Illinois	All Sexes	40-49 years	569	5752	429	245		759	One or more data cells have counts between 1-9 and have been suppressed in accordance with NCHS confidentiality standards.
2021-03-31	2020-01-01	2021-03-27	By Total			Illinois	All Sexes	45-54 years	935	8388	766	454		1256	One or more data cells have counts between 1-9 and have been suppressed in accordance with NCHS confidentiality standards.
2021-03-31	2020-01-01	2021-03-27	By Total			Illinois	All Sexes	50-64 years	2789	24917	2535	1461	47	3908
2021-03-31	2020-01-01	2021-03-27	By Total			Illinois	All Sexes	55-64 years	2216	19903	2047	1176	40	3125
2021-03-31	2020-01-01	2021-03-27	By Total			Illinois	All Sexes	65-74 years	4328	30697	3882	2352	35	5892
2021-03-31	2020-01-01	2021-03-27	By Total			Illinois	All Sexes	75-84 years	5452	37364	5028	2918	56	7615
2021-03-31	2020-01-01	2021-03-27	By Total			Illinois	All Sexes	85 years and over	6973	49841	5532	2991	70	9583
2021-03-31	2020-01-01	2021-03-27	By Total			Illinois	Male	All Ages	11124	80602	9791	5857	98	15152
2021-03-31	2020-01-01	2021-03-27	By Total			Illinois	Male	Under 1 year		457			0		One or more data cells have counts between 1-9 and have been suppressed in accordance with NCHS confidentiality standards.
2021-03-31	2020-01-01	2021-03-27	By Total			Illinois	Male	0-17 years		818	11			15	One or more data cells have counts between 1-9 and have been suppressed in accordance with NCHS confidentiality standards.
2021-03-31	2020-01-01	2021-03-27	By Total			Illinois	Male	1-4 years	0	72		0			One or more data cells have counts between 1-9 and have been suppressed in accordance with NCHS confidentiality standards.
2021-03-31	2020-01-01	2021-03-27	By Total			Illinois	Male	5-14 years		121			0		One or more data cells have counts between 1-9 and have been suppressed in accordance with NCHS confidentiality standards.
2021-03-31	2020-01-01	2021-03-27	By Total			Illinois	Male	15-24 years	20	1164	18		0	30	One or more data cells have counts between 1-9 and have been suppressed in accordance with NCHS confidentiality standards.
2021-03-31	2020-01-01	2021-03-27	By Total			Illinois	Male	18-29 years	49	2124	46	19		78	One or more data cells have counts between 1-9 and have been suppressed in accordance with NCHS confidentiality standards.
2021-03-31	2020-01-01	2021-03-27	By Total			Illinois	Male	25-34 years	86	2262	65	27		126	One or more data cells have counts between 1-9 and have been suppressed in accordance with NCHS confidentiality standards.
2021-03-31	2020-01-01	2021-03-27	By Total			Illinois	Male	30-39 years	144	2484	110	59		197	One or more data cells have counts between 1-9 and have been suppressed in accordance with NCHS confidentiality standards.
2021-03-31	2020-01-01	2021-03-27	By Total			Illinois	Male	35-44 years	235	2925	171	97		313	One or more data cells have counts between 1-9 and have been suppressed in accordance with NCHS confidentiality standards.
2021-03-31	2020-01-01	2021-03-27	By Total			Illinois	Male	40-49 years	408	3759	272	174		510	One or more data cells have counts between 1-9 and have been suppressed in accordance with NCHS confidentiality standards.
2021-03-31	2020-01-01	2021-03-27	By Total			Illinois	Male	45-54 years	643	5377	484	305		827	One or more data cells have counts between 1-9 and have been suppressed in accordance with NCHS confidentiality standards.
2021-03-31	2020-01-01	2021-03-27	By Total			Illinois	Male	50-64 years	1826	15574	1578	957	24	2469
2021-03-31	2020-01-01	2021-03-27	By Total			Illinois	Male	55-64 years	1445	12381	1269	772	21	1961
2021-03-31	2020-01-01	2021-03-27	By Total			Illinois	Male	65-74 years	2733	17785	2401	1503	18	3649
2021-03-31	2020-01-01	2021-03-27	By Total			Illinois	Male	75-84 years	3086	19175	2868	1741	24	4236
2021-03-31	2020-01-01	2021-03-27	By Total			Illinois	Male	85 years and over	2873	18883	2505	1402	23	3998
2021-03-31	2020-01-01	2021-03-27	By Total			Illinois	Female	All Ages	9298	75787	7889	4240	129	13073
2021-03-31	2020-01-01	2021-03-27	By Total			Illinois	Female	Under 1 year		354		0	0		One or more data cells have counts between 1-9 and have been suppressed in accordance with NCHS confidentiality standards.
2021-03-31	2020-01-01	2021-03-27	By Total			Illinois	Female	0-17 years		589	11	0		16	One or more data cells have counts between 1-9 and have been suppressed in accordance with NCHS confidentiality standards.
2021-03-31	2020-01-01	2021-03-27	By Total			Illinois	Female	1-4 years	0	69		0			One or more data cells have counts between 1-9 and have been suppressed in accordance with NCHS confidentiality standards.
2021-03-31	2020-01-01	2021-03-27	By Total			Illinois	Female	5-14 years	0	107		0			One or more data cells have counts between 1-9 and have been suppressed in accordance with NCHS confidentiality standards.
2021-03-31	2020-01-01	2021-03-27	By Total			Illinois	Female	15-24 years	12	395	10			20	One or more data cells have counts between 1-9 and have been suppressed in accordance with NCHS confidentiality standards.
2021-03-31	2020-01-01	2021-03-27	By Total			Illinois	Female	18-29 years	28	697	25	12		43	One or more data cells have counts between 1-9 and have been suppressed in accordance with NCHS confidentiality standards.
2021-03-31	2020-01-01	2021-03-27	By Total			Illinois	Female	25-34 years	53	810	41	23		72	One or more data cells have counts between 1-9 and have been suppressed in accordance with NCHS confidentiality standards.
2021-03-31	2020-01-01	2021-03-27	By Total			Illinois	Female	30-39 years	84	1106	71	38		119	One or more data cells have counts between 1-9 and have been suppressed in accordance with NCHS confidentiality standards.
2021-03-31	2020-01-01	2021-03-27	By Total			Illinois	Female	35-44 years	108	1460	99	45		166	One or more data cells have counts between 1-9 and have been suppressed in accordance with NCHS confidentiality standards.
2021-03-31	2020-01-01	2021-03-27	By Total			Illinois	Female	40-49 years	161	1993	157	71		249	One or more data cells have counts between 1-9 and have been suppressed in accordance with NCHS confidentiality standards.
2021-03-31	2020-01-01	2021-03-27	By Total			Illinois	Female	45-54 years	292	3011	282	149		429	One or more data cells have counts between 1-9 and have been suppressed in accordance with NCHS confidentiality standards.
2021-03-31	2020-01-01	2021-03-27	By Total			Illinois	Female	50-64 years	963	9343	957	504	23	1439
2021-03-31	2020-01-01	2021-03-27	By Total			Illinois	Female	55-64 years	771	7522	778	404	19	1164
2021-03-31	2020-01-01	2021-03-27	By Total			Illinois	Female	65-74 years	1595	12912	1481	849	17	2243
2021-03-31	2020-01-01	2021-03-27	By Total			Illinois	Female	75-84 years	2366	18189	2160	1177	32	3379
2021-03-31	2020-01-01	2021-03-27	By Total			Illinois	Female	85 years and over	4100	30958	3027	1589	47	5585
2021-03-31	2020-01-01	2021-03-27	By Total			Indiana	All Sexes	All Ages	11895	90374	10512	5654	179	16926
2021-03-31	2020-01-01	2021-03-27	By Total			Indiana	All Sexes	Under 1 year		532		0	0		One or more data cells have counts between 1-9 and have been suppressed in accordance with NCHS confidentiality standards.
2021-03-31	2020-01-01	2021-03-27	By Total			Indiana	All Sexes	0-17 years		912	12			21	One or more data cells have counts between 1-9 and have been suppressed in accordance with NCHS confidentiality standards.
2021-03-31	2020-01-01	2021-03-27	By Total			Indiana	All Sexes	1-4 years		85	0	0			One or more data cells have counts between 1-9 and have been suppressed in accordance with NCHS confidentiality standards.
2021-03-31	2020-01-01	2021-03-27	By Total			Indiana	All Sexes	5-14 years		156		0			One or more data cells have counts between 1-9 and have been suppressed in accordance with NCHS confidentiality standards.
2021-03-31	2020-01-01	2021-03-27	By Total			Indiana	All Sexes	15-24 years	10	985	16			24	One or more data cells have counts between 1-9 and have been suppressed in accordance with NCHS confidentiality standards.
2021-03-31	2020-01-01	2021-03-27	By Total			Indiana	All Sexes	18-29 years	20	1710	29			43	One or more data cells have counts between 1-9 and have been suppressed in accordance with NCHS confidentiality standards.
2021-03-31	2020-01-01	2021-03-27	By Total			Indiana	All Sexes	25-34 years	33	1944	46	14		69	One or more data cells have counts between 1-9 and have been suppressed in accordance with NCHS confidentiality standards.
2021-03-31	2020-01-01	2021-03-27	By Total			Indiana	All Sexes	30-39 years	63	2237	72	27		115	One or more data cells have counts between 1-9 and have been suppressed in accordance with NCHS confidentiality standards.
2021-03-31	2020-01-01	2021-03-27	By Total			Indiana	All Sexes	35-44 years	115	2570	150	63		207	One or more data cells have counts between 1-9 and have been suppressed in accordance with NCHS confidentiality standards.
2021-03-31	2020-01-01	2021-03-27	By Total			Indiana	All Sexes	40-49 years	198	3366	258	113		351	One or more data cells have counts between 1-9 and have been suppressed in accordance with NCHS confidentiality standards.
2021-03-31	2020-01-01	2021-03-27	By Total			Indiana	All Sexes	45-54 years	331	4843	413	183	14	575
2021-03-31	2020-01-01	2021-03-27	By Total			Indiana	All Sexes	50-64 years	1342	14748	1560	757	33	2177
2021-03-31	2020-01-01	2021-03-27	By Total			Indiana	All Sexes	55-64 years	1136	11858	1298	642	26	1817
2021-03-31	2020-01-01	2021-03-27	By Total			Indiana	All Sexes	65-74 years	2382	18404	2428	1328	33	3514
2021-03-31	2020-01-01	2021-03-27	By Total			Indiana	All Sexes	75-84 years	3559	22527	3171	1811	47	4963
2021-03-31	2020-01-01	2021-03-27	By Total			Indiana	All Sexes	85 years and over	4325	26470	2982	1610	46	5742
2021-03-31	2020-01-01	2021-03-27	By Total			Indiana	Male	All Ages	6144	46409	5728	3203	81	8746
2021-03-31	2020-01-01	2021-03-27	By Total			Indiana	Male	Under 1 year		279		0	0		One or more data cells have counts between 1-9 and have been suppressed in accordance with NCHS confidentiality standards.
2021-03-31	2020-01-01	2021-03-27	By Total			Indiana	Male	0-17 years		522				11	One or more data cells have counts between 1-9 and have been suppressed in accordance with NCHS confidentiality standards.
2021-03-31	2020-01-01	2021-03-27	By Total			Indiana	Male	1-4 years		47	0	0	0		One or more data cells have counts between 1-9 and have been suppressed in accordance with NCHS confidentiality standards.
2021-03-31	2020-01-01	2021-03-27	By Total			Indiana	Male	5-14 years	0	91	0	0			One or more data cells have counts between 1-9 and have been suppressed in accordance with NCHS confidentiality standards.
2021-03-31	2020-01-01	2021-03-27	By Total			Indiana	Male	15-24 years		728			0	10	One or more data cells have counts between 1-9 and have been suppressed in accordance with NCHS confidentiality standards.
2021-03-31	2020-01-01	2021-03-27	By Total			Indiana	Male	18-29 years		1220	15			21	One or more data cells have counts between 1-9 and have been suppressed in accordance with NCHS confidentiality standards.
2021-03-31	2020-01-01	2021-03-27	By Total			Indiana	Male	25-34 years	22	1341	30	11		43	One or more data cells have counts between 1-9 and have been suppressed in accordance with NCHS confidentiality standards.
2021-03-31	2020-01-01	2021-03-27	By Total			Indiana	Male	30-39 years	35	1503	40	15		63	One or more data cells have counts between 1-9 and have been suppressed in accordance with NCHS confidentiality standards.
2021-03-31	2020-01-01	2021-03-27	By Total			Indiana	Male	35-44 years	69	1661	81	37		115	One or more data cells have counts between 1-9 and have been suppressed in accordance with NCHS confidentiality standards.
2021-03-31	2020-01-01	2021-03-27	By Total			Indiana	Male	40-49 years	123	2097	139	63		204	One or more data cells have counts between 1-9 and have been suppressed in accordance with NCHS confidentiality standards.
2021-03-31	2020-01-01	2021-03-27	By Total			Indiana	Male	45-54 years	195	2992	225	101		326	One or more data cells have counts between 1-9 and have been suppressed in accordance with NCHS confidentiality standards.
2021-03-31	2020-01-01	2021-03-27	By Total			Indiana	Male	50-64 years	822	8960	893	458	16	1272
2021-03-31	2020-01-01	2021-03-27	By Total			Indiana	Male	55-64 years	701	7163	747	391	14	1070
2021-03-31	2020-01-01	2021-03-27	By Total			Indiana	Male	65-74 years	1432	10502	1439	820	16	2066
2021-03-31	2020-01-01	2021-03-27	By Total			Indiana	Male	75-84 years	1985	11597	1820	1066	25	2762
2021-03-31	2020-01-01	2021-03-27	By Total			Indiana	Male	85 years and over	1733	10008	1376	776	14	2347
2021-03-31	2020-01-01	2021-03-27	By Total			Indiana	Female	All Ages	5751	43965	4784	2451	98	8180
2021-03-31	2020-01-01	2021-03-27	By Total			Indiana	Female	Under 1 year	0	253		0	0		One or more data cells have counts between 1-9 and have been suppressed in accordance with NCHS confidentiality standards.
2021-03-31	2020-01-01	2021-03-27	By Total			Indiana	Female	0-17 years		390		0		10	One or more data cells have counts between 1-9 and have been suppressed in accordance with NCHS confidentiality standards.
2021-03-31	2020-01-01	2021-03-27	By Total			Indiana	Female	1-4 years	0	38	0	0			One or more data cells have counts between 1-9 and have been suppressed in accordance with NCHS confidentiality standards.
2021-03-31	2020-01-01	2021-03-27	By Total			Indiana	Female	5-14 years		65		0			One or more data cells have counts between 1-9 and have been suppressed in accordance with NCHS confidentiality standards.
2021-03-31	2020-01-01	2021-03-27	By Total			Indiana	Female	15-24 years		257				14	One or more data cells have counts between 1-9 and have been suppressed in accordance with NCHS confidentiality standards.
2021-03-31	2020-01-01	2021-03-27	By Total			Indiana	Female	18-29 years	11	490	14		0	22	One or more data cells have counts between 1-9 and have been suppressed in accordance with NCHS confidentiality standards.
2021-03-31	2020-01-01	2021-03-27	By Total			Indiana	Female	25-34 years	11	603	16			26	One or more data cells have counts between 1-9 and have been suppressed in accordance with NCHS confidentiality standards.
2021-03-31	2020-01-01	2021-03-27	By Total			Indiana	Female	30-39 years	28	734	32	12		52	One or more data cells have counts between 1-9 and have been suppressed in accordance with NCHS confidentiality standards.
2021-03-31	2020-01-01	2021-03-27	By Total			Indiana	Female	35-44 years	46	909	69	26		92	One or more data cells have counts between 1-9 and have been suppressed in accordance with NCHS confidentiality standards.
2021-03-31	2020-01-01	2021-03-27	By Total			Indiana	Female	40-49 years	75	1269	119	50		147	One or more data cells have counts between 1-9 and have been suppressed in accordance with NCHS confidentiality standards.
2021-03-31	2020-01-01	2021-03-27	By Total			Indiana	Female	45-54 years	136	1851	188	82		249	One or more data cells have counts between 1-9 and have been suppressed in accordance with NCHS confidentiality standards.
2021-03-31	2020-01-01	2021-03-27	By Total			Indiana	Female	50-64 years	520	5788	667	299	17	905
2021-03-31	2020-01-01	2021-03-27	By Total			Indiana	Female	55-64 years	435	4695	551	251	12	747
2021-03-31	2020-01-01	2021-03-27	By Total			Indiana	Female	65-74 years	950	7902	989	508	17	1448
2021-03-31	2020-01-01	2021-03-27	By Total			Indiana	Female	75-84 years	1574	10930	1351	745	22	2201
2021-03-31	2020-01-01	2021-03-27	By Total			Indiana	Female	85 years and over	2592	16462	1606	834	32	3395
2021-03-31	2020-01-01	2021-03-27	By Total			Iowa	All Sexes	All Ages	5818	42452	4066	2014	98	7965
2021-03-31	2020-01-01	2021-03-27	By Total			Iowa	All Sexes	Under 1 year		164		0			One or more data cells have counts between 1-9 and have been suppressed in accordance with NCHS confidentiality standards.
2021-03-31	2020-01-01	2021-03-27	By Total			Iowa	All Sexes	0-17 years		323		0		13	One or more data cells have counts between 1-9 and have been suppressed in accordance with NCHS confidentiality standards.
2021-03-31	2020-01-01	2021-03-27	By Total			Iowa	All Sexes	1-4 years		40		0			One or more data cells have counts between 1-9 and have been suppressed in accordance with NCHS confidentiality standards.
2021-03-31	2020-01-01	2021-03-27	By Total			Iowa	All Sexes	5-14 years	0	61		0	0		One or more data cells have counts between 1-9 and have been suppressed in accordance with NCHS confidentiality standards.
2021-03-31	2020-01-01	2021-03-27	By Total			Iowa	All Sexes	15-24 years		327					One or more data cells have counts between 1-9 and have been suppressed in accordance with NCHS confidentiality standards.
2021-03-31	2020-01-01	2021-03-27	By Total			Iowa	All Sexes	18-29 years	13	523	15			23	One or more data cells have counts between 1-9 and have been suppressed in accordance with NCHS confidentiality standards.
2021-03-31	2020-01-01	2021-03-27	By Total			Iowa	All Sexes	25-34 years	21	581	20	10		33	One or more data cells have counts between 1-9 and have been suppressed in accordance with NCHS confidentiality standards.
2021-03-31	2020-01-01	2021-03-27	By Total			Iowa	All Sexes	30-39 years	37	728	23	10		51	One or more data cells have counts between 1-9 and have been suppressed in accordance with NCHS confidentiality standards.
2021-03-31	2020-01-01	2021-03-27	By Total			Iowa	All Sexes	35-44 years	48	891	35	12	0	71
2021-03-31	2020-01-01	2021-03-27	By Total			Iowa	All Sexes	40-49 years	72	1186	60	28	0	104
2021-03-31	2020-01-01	2021-03-27	By Total			Iowa	All Sexes	45-54 years	152	1839	131	69		216	One or more data cells have counts between 1-9 and have been suppressed in accordance with NCHS confidentiality standards.
2021-03-31	2020-01-01	2021-03-27	By Total			Iowa	All Sexes	50-64 years	575	5804	484	242	12	828
2021-03-31	2020-01-01	2021-03-27	By Total			Iowa	All Sexes	55-64 years	473	4661	391	194	10	679
2021-03-31	2020-01-01	2021-03-27	By Total			Iowa	All Sexes	65-74 years	993	7918	804	414	24	1406
2021-03-31	2020-01-01	2021-03-27	By Total			Iowa	All Sexes	75-84 years	1632	10463	1138	572	23	2220
2021-03-31	2020-01-01	2021-03-27	By Total			Iowa	All Sexes	85 years and over	2494	15507	1533	741	34	3320
2021-03-31	2020-01-01	2021-03-27	By Total			Iowa	Male	All Ages	3020	21602	2231	1138	39	4149
2021-03-31	2020-01-01	2021-03-27	By Total			Iowa	Male	Under 1 year	0	89		0			One or more data cells have counts between 1-9 and have been suppressed in accordance with NCHS confidentiality standards.
2021-03-31	2020-01-01	2021-03-27	By Total			Iowa	Male	0-17 years	0	196		0			One or more data cells have counts between 1-9 and have been suppressed in accordance with NCHS confidentiality standards.
2021-03-31	2020-01-01	2021-03-27	By Total			Iowa	Male	1-4 years	0	25		0			One or more data cells have counts between 1-9 and have been suppressed in accordance with NCHS confidentiality standards.
2021-03-31	2020-01-01	2021-03-27	By Total			Iowa	Male	5-14 years	0	40		0	0		One or more data cells have counts between 1-9 and have been suppressed in accordance with NCHS confidentiality standards.
2021-03-31	2020-01-01	2021-03-27	By Total			Iowa	Male	15-24 years	0	241		0			One or more data cells have counts between 1-9 and have been suppressed in accordance with NCHS confidentiality standards.
2021-03-31	2020-01-01	2021-03-27	By Total			Iowa	Male	18-29 years		381				11	One or more data cells have counts between 1-9 and have been suppressed in accordance with NCHS confidentiality standards.
2021-03-31	2020-01-01	2021-03-27	By Total			Iowa	Male	25-34 years		410			0	15	One or more data cells have counts between 1-9 and have been suppressed in accordance with NCHS confidentiality standards.
2021-03-31	2020-01-01	2021-03-27	By Total			Iowa	Male	30-39 years	23	495	12		0	31	One or more data cells have counts between 1-9 and have been suppressed in accordance with NCHS confidentiality standards.
2021-03-31	2020-01-01	2021-03-27	By Total			Iowa	Male	35-44 years	33	585	23		0	47	One or more data cells have counts between 1-9 and have been suppressed in accordance with NCHS confidentiality standards.
2021-03-31	2020-01-01	2021-03-27	By Total			Iowa	Male	40-49 years	40	757	39	19	0	60
2021-03-31	2020-01-01	2021-03-27	By Total			Iowa	Male	45-54 years	94	1156	83	44		134	One or more data cells have counts between 1-9 and have been suppressed in accordance with NCHS confidentiality standards.
2021-03-31	2020-01-01	2021-03-27	By Total			Iowa	Male	50-64 years	376	3633	306	160		526	One or more data cells have counts between 1-9 and have been suppressed in accordance with NCHS confidentiality standards.
2021-03-31	2020-01-01	2021-03-27	By Total			Iowa	Male	55-64 years	308	2916	247	129		429	One or more data cells have counts between 1-9 and have been suppressed in accordance with NCHS confidentiality standards.
2021-03-31	2020-01-01	2021-03-27	By Total			Iowa	Male	65-74 years	595	4637	483	242	11	846
2021-03-31	2020-01-01	2021-03-27	By Total			Iowa	Male	75-84 years	912	5493	651	341	11	1232
2021-03-31	2020-01-01	2021-03-27	By Total			Iowa	Male	85 years and over	1069	6010	727	370		1435	One or more data cells have counts between 1-9 and have been suppressed in accordance with NCHS confidentiality standards.
2021-03-31	2020-01-01	2021-03-27	By Total			Iowa	Female	All Ages	2798	20850	1835	876	59	3816
2021-03-31	2020-01-01	2021-03-27	By Total			Iowa	Female	Under 1 year		75		0	0		One or more data cells have counts between 1-9 and have been suppressed in accordance with NCHS confidentiality standards.
2021-03-31	2020-01-01	2021-03-27	By Total			Iowa	Female	0-17 years		127		0	0		One or more data cells have counts between 1-9 and have been suppressed in accordance with NCHS confidentiality standards.
2021-03-31	2020-01-01	2021-03-27	By Total			Iowa	Female	1-4 years		15	0	0	0		One or more data cells have counts between 1-9 and have been suppressed in accordance with NCHS confidentiality standards.
2021-03-31	2020-01-01	2021-03-27	By Total			Iowa	Female	5-14 years	0	21		0	0		One or more data cells have counts between 1-9 and have been suppressed in accordance with NCHS confidentiality standards.
2021-03-31	2020-01-01	2021-03-27	By Total			Iowa	Female	15-24 years		86			0		One or more data cells have counts between 1-9 and have been suppressed in accordance with NCHS confidentiality standards.
2021-03-31	2020-01-01	2021-03-27	By Total			Iowa	Female	18-29 years		142				12	One or more data cells have counts between 1-9 and have been suppressed in accordance with NCHS confidentiality standards.
2021-03-31	2020-01-01	2021-03-27	By Total			Iowa	Female	25-34 years	12	171	11			18	One or more data cells have counts between 1-9 and have been suppressed in accordance with NCHS confidentiality standards.
2021-03-31	2020-01-01	2021-03-27	By Total			Iowa	Female	30-39 years	14	233	11			20	One or more data cells have counts between 1-9 and have been suppressed in accordance with NCHS confidentiality standards.
2021-03-31	2020-01-01	2021-03-27	By Total			Iowa	Female	35-44 years	15	306	12		0	24	One or more data cells have counts between 1-9 and have been suppressed in accordance with NCHS confidentiality standards.
2021-03-31	2020-01-01	2021-03-27	By Total			Iowa	Female	40-49 years	32	429	21		0	44	One or more data cells have counts between 1-9 and have been suppressed in accordance with NCHS confidentiality standards.
2021-03-31	2020-01-01	2021-03-27	By Total			Iowa	Female	45-54 years	58	683	48	25		82	One or more data cells have counts between 1-9 and have been suppressed in accordance with NCHS confidentiality standards.
2021-03-31	2020-01-01	2021-03-27	By Total			Iowa	Female	50-64 years	199	2171	178	82		302	One or more data cells have counts between 1-9 and have been suppressed in accordance with NCHS confidentiality standards.
2021-03-31	2020-01-01	2021-03-27	By Total			Iowa	Female	55-64 years	165	1745	144	65		250	One or more data cells have counts between 1-9 and have been suppressed in accordance with NCHS confidentiality standards.
2021-03-31	2020-01-01	2021-03-27	By Total			Iowa	Female	65-74 years	398	3281	321	172	13	560
2021-03-31	2020-01-01	2021-03-27	By Total			Iowa	Female	75-84 years	720	4970	487	231	12	988
2021-03-31	2020-01-01	2021-03-27	By Total			Iowa	Female	85 years and over	1425	9497	806	371	25	1885
2021-03-31	2020-01-01	2021-03-27	By Total			Kansas	All Sexes	All Ages	4740	38112	3735	2015	122	6579
2021-03-31	2020-01-01	2021-03-27	By Total			Kansas	All Sexes	Under 1 year	0	218		0			One or more data cells have counts between 1-9 and have been suppressed in accordance with NCHS confidentiality standards.
2021-03-31	2020-01-01	2021-03-27	By Total			Kansas	All Sexes	0-17 years		373		0		11	One or more data cells have counts between 1-9 and have been suppressed in accordance with NCHS confidentiality standards.
2021-03-31	2020-01-01	2021-03-27	By Total			Kansas	All Sexes	1-4 years	0	29		0	0		One or more data cells have counts between 1-9 and have been suppressed in accordance with NCHS confidentiality standards.
2021-03-31	2020-01-01	2021-03-27	By Total			Kansas	All Sexes	5-14 years		65		0			One or more data cells have counts between 1-9 and have been suppressed in accordance with NCHS confidentiality standards.
2021-03-31	2020-01-01	2021-03-27	By Total			Kansas	All Sexes	15-24 years	10	430			0	15	One or more data cells have counts between 1-9 and have been suppressed in accordance with NCHS confidentiality standards.
2021-03-31	2020-01-01	2021-03-27	By Total			Kansas	All Sexes	18-29 years	20	677	13			27	One or more data cells have counts between 1-9 and have been suppressed in accordance with NCHS confidentiality standards.
2021-03-31	2020-01-01	2021-03-27	By Total			Kansas	All Sexes	25-34 years	23	696	19			39	One or more data cells have counts between 1-9 and have been suppressed in accordance with NCHS confidentiality standards.
2021-03-31	2020-01-01	2021-03-27	By Total			Kansas	All Sexes	30-39 years	35	835	32	10		59	One or more data cells have counts between 1-9 and have been suppressed in accordance with NCHS confidentiality standards.
2021-03-31	2020-01-01	2021-03-27	By Total			Kansas	All Sexes	35-44 years	58	1028	50	20		89	One or more data cells have counts between 1-9 and have been suppressed in accordance with NCHS confidentiality standards.
2021-03-31	2020-01-01	2021-03-27	By Total			Kansas	All Sexes	40-49 years	104	1305	76	36		151	One or more data cells have counts between 1-9 and have been suppressed in accordance with NCHS confidentiality standards.
2021-03-31	2020-01-01	2021-03-27	By Total			Kansas	All Sexes	45-54 years	173	1816	136	76		240	One or more data cells have counts between 1-9 and have been suppressed in accordance with NCHS confidentiality standards.
2021-03-31	2020-01-01	2021-03-27	By Total			Kansas	All Sexes	50-64 years	554	5789	505	283	22	798
2021-03-31	2020-01-01	2021-03-27	By Total			Kansas	All Sexes	55-64 years	449	4697	415	232	21	653
2021-03-31	2020-01-01	2021-03-27	By Total			Kansas	All Sexes	65-74 years	902	7453	815	429	23	1310
2021-03-31	2020-01-01	2021-03-27	By Total			Kansas	All Sexes	75-84 years	1354	9157	1059	629	38	1820
2021-03-31	2020-01-01	2021-03-27	By Total			Kansas	All Sexes	85 years and over	1770	12523	1227	621	27	2403
2021-03-31	2020-01-01	2021-03-27	By Total			Kansas	Male	All Ages	2563	19895	2092	1175	57	3534
2021-03-31	2020-01-01	2021-03-27	By Total			Kansas	Male	Under 1 year	0	122		0	0		One or more data cells have counts between 1-9 and have been suppressed in accordance with NCHS confidentiality standards.
2021-03-31	2020-01-01	2021-03-27	By Total			Kansas	Male	0-17 years	0	217		0	0		One or more data cells have counts between 1-9 and have been suppressed in accordance with NCHS confidentiality standards.
2021-03-31	2020-01-01	2021-03-27	By Total			Kansas	Male	1-4 years	0	17		0	0		One or more data cells have counts between 1-9 and have been suppressed in accordance with NCHS confidentiality standards.
2021-03-31	2020-01-01	2021-03-27	By Total			Kansas	Male	5-14 years	0	38	0	0	0	0
2021-03-31	2020-01-01	2021-03-27	By Total			Kansas	Male	15-24 years		333			0	10	One or more data cells have counts between 1-9 and have been suppressed in accordance with NCHS confidentiality standards.
2021-03-31	2020-01-01	2021-03-27	By Total			Kansas	Male	18-29 years	12	527	11			18	One or more data cells have counts between 1-9 and have been suppressed in accordance with NCHS confidentiality standards.
2021-03-31	2020-01-01	2021-03-27	By Total			Kansas	Male	25-34 years	14	509	15			26	One or more data cells have counts between 1-9 and have been suppressed in accordance with NCHS confidentiality standards.
2021-03-31	2020-01-01	2021-03-27	By Total			Kansas	Male	30-39 years	24	561	22			41	One or more data cells have counts between 1-9 and have been suppressed in accordance with NCHS confidentiality standards.
2021-03-31	2020-01-01	2021-03-27	By Total			Kansas	Male	35-44 years	40	668	33	14		60	One or more data cells have counts between 1-9 and have been suppressed in accordance with NCHS confidentiality standards.
2021-03-31	2020-01-01	2021-03-27	By Total			Kansas	Male	40-49 years	72	833	53	28		100	One or more data cells have counts between 1-9 and have been suppressed in accordance with NCHS confidentiality standards.
2021-03-31	2020-01-01	2021-03-27	By Total			Kansas	Male	45-54 years	105	1099	77	44		140	One or more data cells have counts between 1-9 and have been suppressed in accordance with NCHS confidentiality standards.
2021-03-31	2020-01-01	2021-03-27	By Total			Kansas	Male	50-64 years	342	3497	301	175	11	479
2021-03-31	2020-01-01	2021-03-27	By Total			Kansas	Male	55-64 years	284	2849	257	150	11	402
2021-03-31	2020-01-01	2021-03-27	By Total			Kansas	Male	65-74 years	535	4382	498	267	11	776
2021-03-31	2020-01-01	2021-03-27	By Total			Kansas	Male	75-84 years	808	4865	628	396	19	1057
2021-03-31	2020-01-01	2021-03-27	By Total			Kansas	Male	85 years and over	770	5013	574	297	11	1058
2021-03-31	2020-01-01	2021-03-27	By Total			Kansas	Female	All Ages	2177	18217	1643	840	65	3045
2021-03-31	2020-01-01	2021-03-27	By Total			Kansas	Female	Under 1 year	0	96		0			One or more data cells have counts between 1-9 and have been suppressed in accordance with NCHS confidentiality standards.
2021-03-31	2020-01-01	2021-03-27	By Total			Kansas	Female	0-17 years		156		0			One or more data cells have counts between 1-9 and have been suppressed in accordance with NCHS confidentiality standards.
2021-03-31	2020-01-01	2021-03-27	By Total			Kansas	Female	1-4 years	0	12	0	0	0	0
2021-03-31	2020-01-01	2021-03-27	By Total			Kansas	Female	5-14 years		27		0			One or more data cells have counts between 1-9 and have been suppressed in accordance with NCHS confidentiality standards.
2021-03-31	2020-01-01	2021-03-27	By Total			Kansas	Female	15-24 years		97		0	0		One or more data cells have counts between 1-9 and have been suppressed in accordance with NCHS confidentiality standards.
2021-03-31	2020-01-01	2021-03-27	By Total			Kansas	Female	18-29 years		150			0		One or more data cells have counts between 1-9 and have been suppressed in accordance with NCHS confidentiality standards.
2021-03-31	2020-01-01	2021-03-27	By Total			Kansas	Female	25-34 years		187				13	One or more data cells have counts between 1-9 and have been suppressed in accordance with NCHS confidentiality standards.
2021-03-31	2020-01-01	2021-03-27	By Total			Kansas	Female	30-39 years	11	274	10			18	One or more data cells have counts between 1-9 and have been suppressed in accordance with NCHS confidentiality standards.
2021-03-31	2020-01-01	2021-03-27	By Total			Kansas	Female	35-44 years	18	360	17		0	29	One or more data cells have counts between 1-9 and have been suppressed in accordance with NCHS confidentiality standards.
2021-03-31	2020-01-01	2021-03-27	By Total			Kansas	Female	40-49 years	32	472	23			51	One or more data cells have counts between 1-9 and have been suppressed in accordance with NCHS confidentiality standards.
2021-03-31	2020-01-01	2021-03-27	By Total			Kansas	Female	45-54 years	68	717	59	32		100	One or more data cells have counts between 1-9 and have been suppressed in accordance with NCHS confidentiality standards.
2021-03-31	2020-01-01	2021-03-27	By Total			Kansas	Female	50-64 years	212	2292	204	108	11	319
2021-03-31	2020-01-01	2021-03-27	By Total			Kansas	Female	55-64 years	165	1848	158	82	10	251
2021-03-31	2020-01-01	2021-03-27	By Total			Kansas	Female	65-74 years	367	3071	317	162	12	534
2021-03-31	2020-01-01	2021-03-27	By Total			Kansas	Female	75-84 years	546	4292	431	233	19	763
2021-03-31	2020-01-01	2021-03-27	By Total			Kansas	Female	85 years and over	1000	7510	653	324	16	1345
2021-03-31	2020-01-01	2021-03-27	By Total			Kentucky	All Sexes	All Ages	6736	66959	7736	3383	152	11234
2021-03-31	2020-01-01	2021-03-27	By Total			Kentucky	All Sexes	Under 1 year		322		0	0		One or more data cells have counts between 1-9 and have been suppressed in accordance with NCHS confidentiality standards.
2021-03-31	2020-01-01	2021-03-27	By Total			Kentucky	All Sexes	0-17 years		566	10	0		12	One or more data cells have counts between 1-9 and have been suppressed in accordance with NCHS confidentiality standards.
2021-03-31	2020-01-01	2021-03-27	By Total			Kentucky	All Sexes	1-4 years	0	46		0	0		One or more data cells have counts between 1-9 and have been suppressed in accordance with NCHS confidentiality standards.
2021-03-31	2020-01-01	2021-03-27	By Total			Kentucky	All Sexes	5-14 years	0	97	0	0			One or more data cells have counts between 1-9 and have been suppressed in accordance with NCHS confidentiality standards.
2021-03-31	2020-01-01	2021-03-27	By Total			Kentucky	All Sexes	15-24 years	0	711	11	0		14	One or more data cells have counts between 1-9 and have been suppressed in accordance with NCHS confidentiality standards.
2021-03-31	2020-01-01	2021-03-27	By Total			Kentucky	All Sexes	18-29 years		1252	21			25	One or more data cells have counts between 1-9 and have been suppressed in accordance with NCHS confidentiality standards.
2021-03-31	2020-01-01	2021-03-27	By Total			Kentucky	All Sexes	25-34 years	16	1488	40			49	One or more data cells have counts between 1-9 and have been suppressed in accordance with NCHS confidentiality standards.
2021-03-31	2020-01-01	2021-03-27	By Total			Kentucky	All Sexes	30-39 years	35	2008	74	21		91	One or more data cells have counts between 1-9 and have been suppressed in accordance with NCHS confidentiality standards.
2021-03-31	2020-01-01	2021-03-27	By Total			Kentucky	All Sexes	35-44 years	71	2514	137	44		167	One or more data cells have counts between 1-9 and have been suppressed in accordance with NCHS confidentiality standards.
2021-03-31	2020-01-01	2021-03-27	By Total			Kentucky	All Sexes	40-49 years	111	3114	208	56		271	One or more data cells have counts between 1-9 and have been suppressed in accordance with NCHS confidentiality standards.
2021-03-31	2020-01-01	2021-03-27	By Total			Kentucky	All Sexes	45-54 years	208	4410	339	100	12	459
2021-03-31	2020-01-01	2021-03-27	By Total			Kentucky	All Sexes	50-64 years	876	12720	1287	480	39	1719
2021-03-31	2020-01-01	2021-03-27	By Total			Kentucky	All Sexes	55-64 years	730	10072	1066	406	33	1420
2021-03-31	2020-01-01	2021-03-27	By Total			Kentucky	All Sexes	65-74 years	1570	14636	1953	896	39	2663
2021-03-31	2020-01-01	2021-03-27	By Total			Kentucky	All Sexes	75-84 years	1996	16467	2280	1060	31	3246
2021-03-31	2020-01-01	2021-03-27	By Total			Kentucky	All Sexes	85 years and over	2144	16196	1903	868	28	3207
2021-03-31	2020-01-01	2021-03-27	By Total			Kentucky	Male	All Ages	3393	34927	4159	1862	72	5758
2021-03-31	2020-01-01	2021-03-27	By Total			Kentucky	Male	Under 1 year		192		0	0		One or more data cells have counts between 1-9 and have been suppressed in accordance with NCHS confidentiality standards.
2021-03-31	2020-01-01	2021-03-27	By Total			Kentucky	Male	0-17 years		347		0	0		One or more data cells have counts between 1-9 and have been suppressed in accordance with NCHS confidentiality standards.
2021-03-31	2020-01-01	2021-03-27	By Total			Kentucky	Male	1-4 years	0	27	0	0	0	0
2021-03-31	2020-01-01	2021-03-27	By Total			Kentucky	Male	5-14 years	0	52	0	0	0	0
2021-03-31	2020-01-01	2021-03-27	By Total			Kentucky	Male	15-24 years	0	513		0	0		One or more data cells have counts between 1-9 and have been suppressed in accordance with NCHS confidentiality standards.
2021-03-31	2020-01-01	2021-03-27	By Total			Kentucky	Male	18-29 years	0	873		0	0		One or more data cells have counts between 1-9 and have been suppressed in accordance with NCHS confidentiality standards.
2021-03-31	2020-01-01	2021-03-27	By Total			Kentucky	Male	25-34 years		1019	20			26	One or more data cells have counts between 1-9 and have been suppressed in accordance with NCHS confidentiality standards.
2021-03-31	2020-01-01	2021-03-27	By Total			Kentucky	Male	30-39 years	23	1366	44	13		55	One or more data cells have counts between 1-9 and have been suppressed in accordance with NCHS confidentiality standards.
2021-03-31	2020-01-01	2021-03-27	By Total			Kentucky	Male	35-44 years	48	1663	80	30		99	One or more data cells have counts between 1-9 and have been suppressed in accordance with NCHS confidentiality standards.
2021-03-31	2020-01-01	2021-03-27	By Total			Kentucky	Male	40-49 years	74	1960	121	36		162	One or more data cells have counts between 1-9 and have been suppressed in accordance with NCHS confidentiality standards.
2021-03-31	2020-01-01	2021-03-27	By Total			Kentucky	Male	45-54 years	125	2713	195	59		267	One or more data cells have counts between 1-9 and have been suppressed in accordance with NCHS confidentiality standards.
2021-03-31	2020-01-01	2021-03-27	By Total			Kentucky	Male	50-64 years	505	7708	745	277	21	992
2021-03-31	2020-01-01	2021-03-27	By Total			Kentucky	Male	55-64 years	421	6075	619	234	17	821
2021-03-31	2020-01-01	2021-03-27	By Total			Kentucky	Male	65-74 years	930	8283	1135	549	19	1533
2021-03-31	2020-01-01	2021-03-27	By Total			Kentucky	Male	75-84 years	1046	8328	1248	591	16	1719
2021-03-31	2020-01-01	2021-03-27	By Total			Kentucky	Male	85 years and over	814	6062	853	396	12	1283
2021-03-31	2020-01-01	2021-03-27	By Total			Kentucky	Female	All Ages	3343	32032	3577	1521	80	5476
2021-03-31	2020-01-01	2021-03-27	By Total			Kentucky	Female	Under 1 year	0	130		0	0		One or more data cells have counts between 1-9 and have been suppressed in accordance with NCHS confidentiality standards.
2021-03-31	2020-01-01	2021-03-27	By Total			Kentucky	Female	0-17 years	0	219		0			One or more data cells have counts between 1-9 and have been suppressed in accordance with NCHS confidentiality standards.
2021-03-31	2020-01-01	2021-03-27	By Total			Kentucky	Female	1-4 years	0	19		0	0		One or more data cells have counts between 1-9 and have been suppressed in accordance with NCHS confidentiality standards.
2021-03-31	2020-01-01	2021-03-27	By Total			Kentucky	Female	5-14 years	0	45	0	0			One or more data cells have counts between 1-9 and have been suppressed in accordance with NCHS confidentiality standards.
2021-03-31	2020-01-01	2021-03-27	By Total			Kentucky	Female	15-24 years	0	198		0			One or more data cells have counts between 1-9 and have been suppressed in accordance with NCHS confidentiality standards.
2021-03-31	2020-01-01	2021-03-27	By Total			Kentucky	Female	18-29 years		379	12			16	One or more data cells have counts between 1-9 and have been suppressed in accordance with NCHS confidentiality standards.
2021-03-31	2020-01-01	2021-03-27	By Total			Kentucky	Female	25-34 years		469	20			23	One or more data cells have counts between 1-9 and have been suppressed in accordance with NCHS confidentiality standards.
2021-03-31	2020-01-01	2021-03-27	By Total			Kentucky	Female	30-39 years	12	642	30			36	One or more data cells have counts between 1-9 and have been suppressed in accordance with NCHS confidentiality standards.
2021-03-31	2020-01-01	2021-03-27	By Total			Kentucky	Female	35-44 years	23	851	57	14		68	One or more data cells have counts between 1-9 and have been suppressed in accordance with NCHS confidentiality standards.
2021-03-31	2020-01-01	2021-03-27	By Total			Kentucky	Female	40-49 years	37	1154	87	20		109	One or more data cells have counts between 1-9 and have been suppressed in accordance with NCHS confidentiality standards.
2021-03-31	2020-01-01	2021-03-27	By Total			Kentucky	Female	45-54 years	83	1697	144	41		192	One or more data cells have counts between 1-9 and have been suppressed in accordance with NCHS confidentiality standards.
2021-03-31	2020-01-01	2021-03-27	By Total			Kentucky	Female	50-64 years	371	5012	542	203	18	727
2021-03-31	2020-01-01	2021-03-27	By Total			Kentucky	Female	55-64 years	309	3997	447	172	16	599
2021-03-31	2020-01-01	2021-03-27	By Total			Kentucky	Female	65-74 years	640	6353	818	347	20	1130
2021-03-31	2020-01-01	2021-03-27	By Total			Kentucky	Female	75-84 years	950	8139	1032	469	15	1527
2021-03-31	2020-01-01	2021-03-27	By Total			Kentucky	Female	85 years and over	1330	10134	1050	472	16	1924
2021-03-31	2020-01-01	2021-03-27	By Total			Louisiana	All Sexes	All Ages	8987	67651	7117	4592	99	11603
2021-03-31	2020-01-01	2021-03-27	By Total			Louisiana	All Sexes	Under 1 year		449		0		14	One or more data cells have counts between 1-9 and have been suppressed in accordance with NCHS confidentiality standards.
2021-03-31	2020-01-01	2021-03-27	By Total			Louisiana	All Sexes	0-17 years		797	18	0		29	One or more data cells have counts between 1-9 and have been suppressed in accordance with NCHS confidentiality standards.
2021-03-31	2020-01-01	2021-03-27	By Total			Louisiana	All Sexes	1-4 years		85		0	0		One or more data cells have counts between 1-9 and have been suppressed in accordance with NCHS confidentiality standards.
2021-03-31	2020-01-01	2021-03-27	By Total			Louisiana	All Sexes	5-14 years		134		0			One or more data cells have counts between 1-9 and have been suppressed in accordance with NCHS confidentiality standards.
2021-03-31	2020-01-01	2021-03-27	By Total			Louisiana	All Sexes	15-24 years	18	872	20			30	One or more data cells have counts between 1-9 and have been suppressed in accordance with NCHS confidentiality standards.
2021-03-31	2020-01-01	2021-03-27	By Total			Louisiana	All Sexes	18-29 years	35	1523	47	20		63	One or more data cells have counts between 1-9 and have been suppressed in accordance with NCHS confidentiality standards.
2021-03-31	2020-01-01	2021-03-27	By Total			Louisiana	All Sexes	25-34 years	63	1754	64	31		98	One or more data cells have counts between 1-9 and have been suppressed in accordance with NCHS confidentiality standards.
2021-03-31	2020-01-01	2021-03-27	By Total			Louisiana	All Sexes	30-39 years	111	2169	99	61		156	One or more data cells have counts between 1-9 and have been suppressed in accordance with NCHS confidentiality standards.
2021-03-31	2020-01-01	2021-03-27	By Total			Louisiana	All Sexes	35-44 years	169	2537	148	88		234	One or more data cells have counts between 1-9 and have been suppressed in accordance with NCHS confidentiality standards.
2021-03-31	2020-01-01	2021-03-27	By Total			Louisiana	All Sexes	40-49 years	276	3099	202	127		356	One or more data cells have counts between 1-9 and have been suppressed in accordance with NCHS confidentiality standards.
2021-03-31	2020-01-01	2021-03-27	By Total			Louisiana	All Sexes	45-54 years	456	4291	332	221	15	581
2021-03-31	2020-01-01	2021-03-27	By Total			Louisiana	All Sexes	50-64 years	1534	12652	1241	797	26	2000
2021-03-31	2020-01-01	2021-03-27	By Total			Louisiana	All Sexes	55-64 years	1252	10118	1027	656	16	1636
2021-03-31	2020-01-01	2021-03-27	By Total			Louisiana	All Sexes	65-74 years	2280	14932	1827	1220	21	2905
2021-03-31	2020-01-01	2021-03-27	By Total			Louisiana	All Sexes	75-84 years	2628	16268	2014	1347	20	3314
2021-03-31	2020-01-01	2021-03-27	By Total			Louisiana	All Sexes	85 years and over	2114	16211	1669	1020	17	2780
2021-03-31	2020-01-01	2021-03-27	By Total			Louisiana	Male	All Ages	4868	35768	3886	2550	42	6242
2021-03-31	2020-01-01	2021-03-27	By Total			Louisiana	Male	Under 1 year		243		0	0		One or more data cells have counts between 1-9 and have been suppressed in accordance with NCHS confidentiality standards.
2021-03-31	2020-01-01	2021-03-27	By Total			Louisiana	Male	0-17 years		469	10	0	0	16	One or more data cells have counts between 1-9 and have been suppressed in accordance with NCHS confidentiality standards.
2021-03-31	2020-01-01	2021-03-27	By Total			Louisiana	Male	1-4 years		51		0	0		One or more data cells have counts between 1-9 and have been suppressed in accordance with NCHS confidentiality standards.
2021-03-31	2020-01-01	2021-03-27	By Total			Louisiana	Male	5-14 years		84		0	0		One or more data cells have counts between 1-9 and have been suppressed in accordance with NCHS confidentiality standards.
2021-03-31	2020-01-01	2021-03-27	By Total			Louisiana	Male	15-24 years	13	632	11		0	20	One or more data cells have counts between 1-9 and have been suppressed in accordance with NCHS confidentiality standards.
2021-03-31	2020-01-01	2021-03-27	By Total			Louisiana	Male	18-29 years	21	1110	24		0	36	One or more data cells have counts between 1-9 and have been suppressed in accordance with NCHS confidentiality standards.
2021-03-31	2020-01-01	2021-03-27	By Total			Louisiana	Male	25-34 years	36	1207	34	17		54	One or more data cells have counts between 1-9 and have been suppressed in accordance with NCHS confidentiality standards.
2021-03-31	2020-01-01	2021-03-27	By Total			Louisiana	Male	30-39 years	63	1439	55	33		88	One or more data cells have counts between 1-9 and have been suppressed in accordance with NCHS confidentiality standards.
2021-03-31	2020-01-01	2021-03-27	By Total			Louisiana	Male	35-44 years	92	1670	83	52		125	One or more data cells have counts between 1-9 and have been suppressed in accordance with NCHS confidentiality standards.
2021-03-31	2020-01-01	2021-03-27	By Total			Louisiana	Male	40-49 years	164	1985	118	79		205	One or more data cells have counts between 1-9 and have been suppressed in accordance with NCHS confidentiality standards.
2021-03-31	2020-01-01	2021-03-27	By Total			Louisiana	Male	45-54 years	282	2657	186	137		336	One or more data cells have counts between 1-9 and have been suppressed in accordance with NCHS confidentiality standards.
2021-03-31	2020-01-01	2021-03-27	By Total			Louisiana	Male	50-64 years	891	7632	703	461	11	1143
2021-03-31	2020-01-01	2021-03-27	By Total			Louisiana	Male	55-64 years	718	6091	586	372		939	One or more data cells have counts between 1-9 and have been suppressed in accordance with NCHS confidentiality standards.
2021-03-31	2020-01-01	2021-03-27	By Total			Louisiana	Male	65-74 years	1363	8608	1093	733	12	1733
2021-03-31	2020-01-01	2021-03-27	By Total			Louisiana	Male	75-84 years	1425	8280	1114	751		1795	One or more data cells have counts between 1-9 and have been suppressed in accordance with NCHS confidentiality standards.
2021-03-31	2020-01-01	2021-03-27	By Total			Louisiana	Male	85 years and over	935	6245	769	484		1226	One or more data cells have counts between 1-9 and have been suppressed in accordance with NCHS confidentiality standards.
2021-03-31	2020-01-01	2021-03-27	By Total			Louisiana	Female	All Ages	4119	31883	3231	2042	57	5361
2021-03-31	2020-01-01	2021-03-27	By Total			Louisiana	Female	Under 1 year		206		0			One or more data cells have counts between 1-9 and have been suppressed in accordance with NCHS confidentiality standards.
2021-03-31	2020-01-01	2021-03-27	By Total			Louisiana	Female	0-17 years		328		0		13	One or more data cells have counts between 1-9 and have been suppressed in accordance with NCHS confidentiality standards.
2021-03-31	2020-01-01	2021-03-27	By Total			Louisiana	Female	1-4 years	0	34		0	0		One or more data cells have counts between 1-9 and have been suppressed in accordance with NCHS confidentiality standards.
2021-03-31	2020-01-01	2021-03-27	By Total			Louisiana	Female	5-14 years	0	50		0			One or more data cells have counts between 1-9 and have been suppressed in accordance with NCHS confidentiality standards.
2021-03-31	2020-01-01	2021-03-27	By Total			Louisiana	Female	15-24 years		240				10	One or more data cells have counts between 1-9 and have been suppressed in accordance with NCHS confidentiality standards.
2021-03-31	2020-01-01	2021-03-27	By Total			Louisiana	Female	18-29 years	14	413	23	11		27	One or more data cells have counts between 1-9 and have been suppressed in accordance with NCHS confidentiality standards.
2021-03-31	2020-01-01	2021-03-27	By Total			Louisiana	Female	25-34 years	27	547	30	14		44	One or more data cells have counts between 1-9 and have been suppressed in accordance with NCHS confidentiality standards.
2021-03-31	2020-01-01	2021-03-27	By Total			Louisiana	Female	30-39 years	48	730	44	28		68	One or more data cells have counts between 1-9 and have been suppressed in accordance with NCHS confidentiality standards.
2021-03-31	2020-01-01	2021-03-27	By Total			Louisiana	Female	35-44 years	77	867	65	36		109	One or more data cells have counts between 1-9 and have been suppressed in accordance with NCHS confidentiality standards.
2021-03-31	2020-01-01	2021-03-27	By Total			Louisiana	Female	40-49 years	112	1114	84	48		151	One or more data cells have counts between 1-9 and have been suppressed in accordance with NCHS confidentiality standards.
2021-03-31	2020-01-01	2021-03-27	By Total			Louisiana	Female	45-54 years	174	1634	146	84	10	245
2021-03-31	2020-01-01	2021-03-27	By Total			Louisiana	Female	50-64 years	643	5020	538	336	15	857
2021-03-31	2020-01-01	2021-03-27	By Total			Louisiana	Female	55-64 years	534	4027	441	284		697	One or more data cells have counts between 1-9 and have been suppressed in accordance with NCHS confidentiality standards.
2021-03-31	2020-01-01	2021-03-27	By Total			Louisiana	Female	65-74 years	917	6324	734	487		1172	One or more data cells have counts between 1-9 and have been suppressed in accordance with NCHS confidentiality standards.
2021-03-31	2020-01-01	2021-03-27	By Total			Louisiana	Female	75-84 years	1203	7988	900	596	12	1519
2021-03-31	2020-01-01	2021-03-27	By Total			Louisiana	Female	85 years and over	1179	9966	900	536	11	1554
2021-03-31	2020-01-01	2021-03-27	By Total			Maine	All Sexes	All Ages	825	19186	1294	191	37	1965
2021-03-31	2020-01-01	2021-03-27	By Total			Maine	All Sexes	Under 1 year	0	77	0	0	0	0
2021-03-31	2020-01-01	2021-03-27	By Total			Maine	All Sexes	0-17 years	0	127	0	0			One or more data cells have counts between 1-9 and have been suppressed in accordance with NCHS confidentiality standards.
2021-03-31	2020-01-01	2021-03-27	By Total			Maine	All Sexes	1-4 years	0	10	0	0			One or more data cells have counts between 1-9 and have been suppressed in accordance with NCHS confidentiality standards.
2021-03-31	2020-01-01	2021-03-27	By Total			Maine	All Sexes	5-14 years	0	17	0	0	0	0
2021-03-31	2020-01-01	2021-03-27	By Total			Maine	All Sexes	15-24 years	0	123		0	0		One or more data cells have counts between 1-9 and have been suppressed in accordance with NCHS confidentiality standards.
2021-03-31	2020-01-01	2021-03-27	By Total			Maine	All Sexes	18-29 years		245		0	0		One or more data cells have counts between 1-9 and have been suppressed in accordance with NCHS confidentiality standards.
2021-03-31	2020-01-01	2021-03-27	By Total			Maine	All Sexes	25-34 years		331	10	0		12	One or more data cells have counts between 1-9 and have been suppressed in accordance with NCHS confidentiality standards.
2021-03-31	2020-01-01	2021-03-27	By Total			Maine	All Sexes	30-39 years		410		0		10	One or more data cells have counts between 1-9 and have been suppressed in accordance with NCHS confidentiality standards.
2021-03-31	2020-01-01	2021-03-27	By Total			Maine	All Sexes	35-44 years		491				14	One or more data cells have counts between 1-9 and have been suppressed in accordance with NCHS confidentiality standards.
2021-03-31	2020-01-01	2021-03-27	By Total			Maine	All Sexes	40-49 years	14	635	22			33	One or more data cells have counts between 1-9 and have been suppressed in accordance with NCHS confidentiality standards.
2021-03-31	2020-01-01	2021-03-27	By Total			Maine	All Sexes	45-54 years	19	922	40			57	One or more data cells have counts between 1-9 and have been suppressed in accordance with NCHS confidentiality standards.
2021-03-31	2020-01-01	2021-03-27	By Total			Maine	All Sexes	50-64 years	64	2844	144	14		200	One or more data cells have counts between 1-9 and have been suppressed in accordance with NCHS confidentiality standards.
2021-03-31	2020-01-01	2021-03-27	By Total			Maine	All Sexes	55-64 years	54	2290	118	11		166	One or more data cells have counts between 1-9 and have been suppressed in accordance with NCHS confidentiality standards.
2021-03-31	2020-01-01	2021-03-27	By Total			Maine	All Sexes	65-74 years	127	3755	260	40		352	One or more data cells have counts between 1-9 and have been suppressed in accordance with NCHS confidentiality standards.
2021-03-31	2020-01-01	2021-03-27	By Total			Maine	All Sexes	75-84 years	269	4878	395	71		600	One or more data cells have counts between 1-9 and have been suppressed in accordance with NCHS confidentiality standards.
2021-03-31	2020-01-01	2021-03-27	By Total			Maine	All Sexes	85 years and over	348	6292	460	62	14	760
2021-03-31	2020-01-01	2021-03-27	By Total			Maine	Male	All Ages	396	10031	735	113	17	1035
2021-03-31	2020-01-01	2021-03-27	By Total			Maine	Male	Under 1 year	0	42	0	0	0	0
2021-03-31	2020-01-01	2021-03-27	By Total			Maine	Male	0-17 years	0	81	0	0			One or more data cells have counts between 1-9 and have been suppressed in accordance with NCHS confidentiality standards.
2021-03-31	2020-01-01	2021-03-27	By Total			Maine	Male	1-4 years	0		0	0			One or more data cells have counts between 1-9 and have been suppressed in accordance with NCHS confidentiality standards.
2021-03-31	2020-01-01	2021-03-27	By Total			Maine	Male	5-14 years	0	14	0	0	0	0
2021-03-31	2020-01-01	2021-03-27	By Total			Maine	Male	15-24 years	0	100		0	0		One or more data cells have counts between 1-9 and have been suppressed in accordance with NCHS confidentiality standards.
2021-03-31	2020-01-01	2021-03-27	By Total			Maine	Male	18-29 years		187		0	0		One or more data cells have counts between 1-9 and have been suppressed in accordance with NCHS confidentiality standards.
2021-03-31	2020-01-01	2021-03-27	By Total			Maine	Male	25-34 years		246		0	0		One or more data cells have counts between 1-9 and have been suppressed in accordance with NCHS confidentiality standards.
2021-03-31	2020-01-01	2021-03-27	By Total			Maine	Male	30-39 years		299		0			One or more data cells have counts between 1-9 and have been suppressed in accordance with NCHS confidentiality standards.
2021-03-31	2020-01-01	2021-03-27	By Total			Maine	Male	35-44 years		329					One or more data cells have counts between 1-9 and have been suppressed in accordance with NCHS confidentiality standards.
2021-03-31	2020-01-01	2021-03-27	By Total			Maine	Male	40-49 years		409				15	One or more data cells have counts between 1-9 and have been suppressed in accordance with NCHS confidentiality standards.
2021-03-31	2020-01-01	2021-03-27	By Total			Maine	Male	45-54 years	12	595	22			34	One or more data cells have counts between 1-9 and have been suppressed in accordance with NCHS confidentiality standards.
2021-03-31	2020-01-01	2021-03-27	By Total			Maine	Male	50-64 years	44	1864	88			130	One or more data cells have counts between 1-9 and have been suppressed in accordance with NCHS confidentiality standards.
2021-03-31	2020-01-01	2021-03-27	By Total			Maine	Male	55-64 years	37	1507	71			107	One or more data cells have counts between 1-9 and have been suppressed in accordance with NCHS confidentiality standards.
2021-03-31	2020-01-01	2021-03-27	By Total			Maine	Male	65-74 years	86	2196	166	32		223	One or more data cells have counts between 1-9 and have been suppressed in accordance with NCHS confidentiality standards.
2021-03-31	2020-01-01	2021-03-27	By Total			Maine	Male	75-84 years	138	2545	229	45		325	One or more data cells have counts between 1-9 and have been suppressed in accordance with NCHS confidentiality standards.
2021-03-31	2020-01-01	2021-03-27	By Total			Maine	Male	85 years and over	118	2450	239	27		332	One or more data cells have counts between 1-9 and have been suppressed in accordance with NCHS confidentiality standards.
2021-03-31	2020-01-01	2021-03-27	By Total			Maine	Female	All Ages	429	9155	559	78	20	930
2021-03-31	2020-01-01	2021-03-27	By Total			Maine	Female	Under 1 year	0	35	0	0	0	0
2021-03-31	2020-01-01	2021-03-27	By Total			Maine	Female	0-17 years	0	46	0	0			One or more data cells have counts between 1-9 and have been suppressed in accordance with NCHS confidentiality standards.
2021-03-31	2020-01-01	2021-03-27	By Total			Maine	Female	1-4 years	0		0	0			One or more data cells have counts between 1-9 and have been suppressed in accordance with NCHS confidentiality standards.
2021-03-31	2020-01-01	2021-03-27	By Total			Maine	Female	5-14 years	0		0	0	0	0	One or more data cells have counts between 1-9 and have been suppressed in accordance with NCHS confidentiality standards.
2021-03-31	2020-01-01	2021-03-27	By Total			Maine	Female	15-24 years	0	23		0	0		One or more data cells have counts between 1-9 and have been suppressed in accordance with NCHS confidentiality standards.
2021-03-31	2020-01-01	2021-03-27	By Total			Maine	Female	18-29 years	0	58		0	0		One or more data cells have counts between 1-9 and have been suppressed in accordance with NCHS confidentiality standards.
2021-03-31	2020-01-01	2021-03-27	By Total			Maine	Female	25-34 years	0	85		0			One or more data cells have counts between 1-9 and have been suppressed in accordance with NCHS confidentiality standards.
2021-03-31	2020-01-01	2021-03-27	By Total			Maine	Female	30-39 years		111		0			One or more data cells have counts between 1-9 and have been suppressed in accordance with NCHS confidentiality standards.
2021-03-31	2020-01-01	2021-03-27	By Total			Maine	Female	35-44 years		162			0		One or more data cells have counts between 1-9 and have been suppressed in accordance with NCHS confidentiality standards.
2021-03-31	2020-01-01	2021-03-27	By Total			Maine	Female	40-49 years		226	15		0	18	One or more data cells have counts between 1-9 and have been suppressed in accordance with NCHS confidentiality standards.
2021-03-31	2020-01-01	2021-03-27	By Total			Maine	Female	45-54 years		327	18		0	23	One or more data cells have counts between 1-9 and have been suppressed in accordance with NCHS confidentiality standards.
2021-03-31	2020-01-01	2021-03-27	By Total			Maine	Female	50-64 years	20	980	56		0	70	One or more data cells have counts between 1-9 and have been suppressed in accordance with NCHS confidentiality standards.
2021-03-31	2020-01-01	2021-03-27	By Total			Maine	Female	55-64 years	17	783	47		0	59	One or more data cells have counts between 1-9 and have been suppressed in accordance with NCHS confidentiality standards.
2021-03-31	2020-01-01	2021-03-27	By Total			Maine	Female	65-74 years	41	1559	94			129	One or more data cells have counts between 1-9 and have been suppressed in accordance with NCHS confidentiality standards.
2021-03-31	2020-01-01	2021-03-27	By Total			Maine	Female	75-84 years	131	2333	166	26		275	One or more data cells have counts between 1-9 and have been suppressed in accordance with NCHS confidentiality standards.
2021-03-31	2020-01-01	2021-03-27	By Total			Maine	Female	85 years and over	230	3842	221	35	12	428
2021-03-31	2020-01-01	2021-03-27	By Total			Maryland	All Sexes	All Ages	9196	73372	7597	3669	153	13258
2021-03-31	2020-01-01	2021-03-27	By Total			Maryland	All Sexes	Under 1 year		414		0	0		One or more data cells have counts between 1-9 and have been suppressed in accordance with NCHS confidentiality standards.
2021-03-31	2020-01-01	2021-03-27	By Total			Maryland	All Sexes	0-17 years		628		0		19	One or more data cells have counts between 1-9 and have been suppressed in accordance with NCHS confidentiality standards.
2021-03-31	2020-01-01	2021-03-27	By Total			Maryland	All Sexes	1-4 years		45		0			One or more data cells have counts between 1-9 and have been suppressed in accordance with NCHS confidentiality standards.
2021-03-31	2020-01-01	2021-03-27	By Total			Maryland	All Sexes	5-14 years		85		0			One or more data cells have counts between 1-9 and have been suppressed in accordance with NCHS confidentiality standards.
2021-03-31	2020-01-01	2021-03-27	By Total			Maryland	All Sexes	15-24 years	20	770	17			31	One or more data cells have counts between 1-9 and have been suppressed in accordance with NCHS confidentiality standards.
2021-03-31	2020-01-01	2021-03-27	By Total			Maryland	All Sexes	18-29 years	40	1484	46	17		70	One or more data cells have counts between 1-9 and have been suppressed in accordance with NCHS confidentiality standards.
2021-03-31	2020-01-01	2021-03-27	By Total			Maryland	All Sexes	25-34 years	58	1855	71	24		111	One or more data cells have counts between 1-9 and have been suppressed in accordance with NCHS confidentiality standards.
2021-03-31	2020-01-01	2021-03-27	By Total			Maryland	All Sexes	30-39 years	93	2238	97	31		166	One or more data cells have counts between 1-9 and have been suppressed in accordance with NCHS confidentiality standards.
2021-03-31	2020-01-01	2021-03-27	By Total			Maryland	All Sexes	35-44 years	156	2478	133	51		240	One or more data cells have counts between 1-9 and have been suppressed in accordance with NCHS confidentiality standards.
2021-03-31	2020-01-01	2021-03-27	By Total			Maryland	All Sexes	40-49 years	248	2909	183	88		347	One or more data cells have counts between 1-9 and have been suppressed in accordance with NCHS confidentiality standards.
2021-03-31	2020-01-01	2021-03-27	By Total			Maryland	All Sexes	45-54 years	439	4191	341	175		611	One or more data cells have counts between 1-9 and have been suppressed in accordance with NCHS confidentiality standards.
2021-03-31	2020-01-01	2021-03-27	By Total			Maryland	All Sexes	50-64 years	1351	12232	1118	559	32	1937
2021-03-31	2020-01-01	2021-03-27	By Total			Maryland	All Sexes	55-64 years	1063	9653	882	438	28	1531
2021-03-31	2020-01-01	2021-03-27	By Total			Maryland	All Sexes	65-74 years	1895	14225	1621	814	27	2728
2021-03-31	2020-01-01	2021-03-27	By Total			Maryland	All Sexes	75-84 years	2555	17297	2148	1109	40	3630
2021-03-31	2020-01-01	2021-03-27	By Total			Maryland	All Sexes	85 years and over	3006	22359	2377	1051	37	4361
2021-03-31	2020-01-01	2021-03-27	By Total			Maryland	Male	All Ages	4775	37433	4093	2015	75	6920
2021-03-31	2020-01-01	2021-03-27	By Total			Maryland	Male	Under 1 year		228		0	0		One or more data cells have counts between 1-9 and have been suppressed in accordance with NCHS confidentiality standards.
2021-03-31	2020-01-01	2021-03-27	By Total			Maryland	Male	0-17 years		356		0		10	One or more data cells have counts between 1-9 and have been suppressed in accordance with NCHS confidentiality standards.
2021-03-31	2020-01-01	2021-03-27	By Total			Maryland	Male	1-4 years		22		0			One or more data cells have counts between 1-9 and have been suppressed in accordance with NCHS confidentiality standards.
2021-03-31	2020-01-01	2021-03-27	By Total			Maryland	Male	5-14 years	0	49	0	0			One or more data cells have counts between 1-9 and have been suppressed in accordance with NCHS confidentiality standards.
2021-03-31	2020-01-01	2021-03-27	By Total			Maryland	Male	15-24 years		592	10			16	One or more data cells have counts between 1-9 and have been suppressed in accordance with NCHS confidentiality standards.
2021-03-31	2020-01-01	2021-03-27	By Total			Maryland	Male	18-29 years	26	1096	30	13		44	One or more data cells have counts between 1-9 and have been suppressed in accordance with NCHS confidentiality standards.
2021-03-31	2020-01-01	2021-03-27	By Total			Maryland	Male	25-34 years	44	1290	44	19		72	One or more data cells have counts between 1-9 and have been suppressed in accordance with NCHS confidentiality standards.
2021-03-31	2020-01-01	2021-03-27	By Total			Maryland	Male	30-39 years	68	1506	56	24		104	One or more data cells have counts between 1-9 and have been suppressed in accordance with NCHS confidentiality standards.
2021-03-31	2020-01-01	2021-03-27	By Total			Maryland	Male	35-44 years	106	1621	81	38		151	One or more data cells have counts between 1-9 and have been suppressed in accordance with NCHS confidentiality standards.
2021-03-31	2020-01-01	2021-03-27	By Total			Maryland	Male	40-49 years	158	1869	107	54		214	One or more data cells have counts between 1-9 and have been suppressed in accordance with NCHS confidentiality standards.
2021-03-31	2020-01-01	2021-03-27	By Total			Maryland	Male	45-54 years	286	2644	214	119		385	One or more data cells have counts between 1-9 and have been suppressed in accordance with NCHS confidentiality standards.
2021-03-31	2020-01-01	2021-03-27	By Total			Maryland	Male	50-64 years	862	7463	680	358	17	1197
2021-03-31	2020-01-01	2021-03-27	By Total			Maryland	Male	55-64 years	670	5844	524	269	14	936
2021-03-31	2020-01-01	2021-03-27	By Total			Maryland	Male	65-74 years	1076	7971	933	475	10	1544
2021-03-31	2020-01-01	2021-03-27	By Total			Maryland	Male	75-84 years	1378	8702	1212	617	18	1991
2021-03-31	2020-01-01	2021-03-27	By Total			Maryland	Male	85 years and over	1203	8470	1073	474	18	1816
2021-03-31	2020-01-01	2021-03-27	By Total			Maryland	Female	All Ages	4421	35939	3504	1654	78	6338
2021-03-31	2020-01-01	2021-03-27	By Total			Maryland	Female	Under 1 year	0	186		0	0		One or more data cells have counts between 1-9 and have been suppressed in accordance with NCHS confidentiality standards.
2021-03-31	2020-01-01	2021-03-27	By Total			Maryland	Female	0-17 years		272		0	0		One or more data cells have counts between 1-9 and have been suppressed in accordance with NCHS confidentiality standards.
2021-03-31	2020-01-01	2021-03-27	By Total			Maryland	Female	1-4 years	0	23		0	0		One or more data cells have counts between 1-9 and have been suppressed in accordance with NCHS confidentiality standards.
2021-03-31	2020-01-01	2021-03-27	By Total			Maryland	Female	5-14 years		36		0	0		One or more data cells have counts between 1-9 and have been suppressed in accordance with NCHS confidentiality standards.
2021-03-31	2020-01-01	2021-03-27	By Total			Maryland	Female	15-24 years	11	178			0	15	One or more data cells have counts between 1-9 and have been suppressed in accordance with NCHS confidentiality standards.
2021-03-31	2020-01-01	2021-03-27	By Total			Maryland	Female	18-29 years	14	388	16		0	26	One or more data cells have counts between 1-9 and have been suppressed in accordance with NCHS confidentiality standards.
2021-03-31	2020-01-01	2021-03-27	By Total			Maryland	Female	25-34 years	14	565	27			39	One or more data cells have counts between 1-9 and have been suppressed in accordance with NCHS confidentiality standards.
2021-03-31	2020-01-01	2021-03-27	By Total			Maryland	Female	30-39 years	25	732	41			62	One or more data cells have counts between 1-9 and have been suppressed in accordance with NCHS confidentiality standards.
2021-03-31	2020-01-01	2021-03-27	By Total			Maryland	Female	35-44 years	50	857	52	13	0	89
2021-03-31	2020-01-01	2021-03-27	By Total			Maryland	Female	40-49 years	90	1040	76	34		133	One or more data cells have counts between 1-9 and have been suppressed in accordance with NCHS confidentiality standards.
2021-03-31	2020-01-01	2021-03-27	By Total			Maryland	Female	45-54 years	153	1547	127	56		226	One or more data cells have counts between 1-9 and have been suppressed in accordance with NCHS confidentiality standards.
2021-03-31	2020-01-01	2021-03-27	By Total			Maryland	Female	50-64 years	489	4769	438	201	15	740
2021-03-31	2020-01-01	2021-03-27	By Total			Maryland	Female	55-64 years	393	3809	358	169	14	595
2021-03-31	2020-01-01	2021-03-27	By Total			Maryland	Female	65-74 years	819	6254	688	339	17	1184
2021-03-31	2020-01-01	2021-03-27	By Total			Maryland	Female	75-84 years	1177	8595	936	492	22	1639
2021-03-31	2020-01-01	2021-03-27	By Total			Maryland	Female	85 years and over	1803	13889	1304	577	19	2545
2021-03-31	2020-01-01	2021-03-27	By Total			Massachusetts	All Sexes	All Ages	12820	84235	9478	5064	218	17440
2021-03-31	2020-01-01	2021-03-27	By Total			Massachusetts	All Sexes	Under 1 year		306		0	0		One or more data cells have counts between 1-9 and have been suppressed in accordance with NCHS confidentiality standards.
2021-03-31	2020-01-01	2021-03-27	By Total			Massachusetts	All Sexes	0-17 years		479		0			One or more data cells have counts between 1-9 and have been suppressed in accordance with NCHS confidentiality standards.
2021-03-31	2020-01-01	2021-03-27	By Total			Massachusetts	All Sexes	1-4 years		37	0	0	0		One or more data cells have counts between 1-9 and have been suppressed in accordance with NCHS confidentiality standards.
2021-03-31	2020-01-01	2021-03-27	By Total			Massachusetts	All Sexes	5-14 years	0	66		0	0		One or more data cells have counts between 1-9 and have been suppressed in accordance with NCHS confidentiality standards.
2021-03-31	2020-01-01	2021-03-27	By Total			Massachusetts	All Sexes	15-24 years		507				14	One or more data cells have counts between 1-9 and have been suppressed in accordance with NCHS confidentiality standards.
2021-03-31	2020-01-01	2021-03-27	By Total			Massachusetts	All Sexes	18-29 years	17	1055	17			30	One or more data cells have counts between 1-9 and have been suppressed in accordance with NCHS confidentiality standards.
2021-03-31	2020-01-01	2021-03-27	By Total			Massachusetts	All Sexes	25-34 years	28	1488	30	12		49	One or more data cells have counts between 1-9 and have been suppressed in accordance with NCHS confidentiality standards.
2021-03-31	2020-01-01	2021-03-27	By Total			Massachusetts	All Sexes	30-39 years	45	1904	50	18		83	One or more data cells have counts between 1-9 and have been suppressed in accordance with NCHS confidentiality standards.
2021-03-31	2020-01-01	2021-03-27	By Total			Massachusetts	All Sexes	35-44 years	85	2183	81	27		142	One or more data cells have counts between 1-9 and have been suppressed in accordance with NCHS confidentiality standards.
2021-03-31	2020-01-01	2021-03-27	By Total			Massachusetts	All Sexes	40-49 years	152	2576	114	52		221	One or more data cells have counts between 1-9 and have been suppressed in accordance with NCHS confidentiality standards.
2021-03-31	2020-01-01	2021-03-27	By Total			Massachusetts	All Sexes	45-54 years	274	3837	219	101	16	407
2021-03-31	2020-01-01	2021-03-27	By Total			Massachusetts	All Sexes	50-64 years	1144	11510	1001	522	46	1663
2021-03-31	2020-01-01	2021-03-27	By Total			Massachusetts	All Sexes	55-64 years	963	9100	847	455	37	1387
2021-03-31	2020-01-01	2021-03-27	By Total			Massachusetts	All Sexes	65-74 years	2114	14961	1775	955	38	2971
2021-03-31	2020-01-01	2021-03-27	By Total			Massachusetts	All Sexes	75-84 years	3508	20292	2743	1514	56	4792
2021-03-31	2020-01-01	2021-03-27	By Total			Massachusetts	All Sexes	85 years and over	5837	31458	3773	1998	63	7671
2021-03-31	2020-01-01	2021-03-27	By Total			Massachusetts	Male	All Ages	6349	42261	5092	2749	120	8807
2021-03-31	2020-01-01	2021-03-27	By Total			Massachusetts	Male	Under 1 year		168		0	0		One or more data cells have counts between 1-9 and have been suppressed in accordance with NCHS confidentiality standards.
2021-03-31	2020-01-01	2021-03-27	By Total			Massachusetts	Male	0-17 years		263		0			One or more data cells have counts between 1-9 and have been suppressed in accordance with NCHS confidentiality standards.
2021-03-31	2020-01-01	2021-03-27	By Total			Massachusetts	Male	1-4 years		19	0	0	0		One or more data cells have counts between 1-9 and have been suppressed in accordance with NCHS confidentiality standards.
2021-03-31	2020-01-01	2021-03-27	By Total			Massachusetts	Male	5-14 years	0	36		0	0		One or more data cells have counts between 1-9 and have been suppressed in accordance with NCHS confidentiality standards.
2021-03-31	2020-01-01	2021-03-27	By Total			Massachusetts	Male	15-24 years		347				10	One or more data cells have counts between 1-9 and have been suppressed in accordance with NCHS confidentiality standards.
2021-03-31	2020-01-01	2021-03-27	By Total			Massachusetts	Male	18-29 years	10	755	10		0	18	One or more data cells have counts between 1-9 and have been suppressed in accordance with NCHS confidentiality standards.
2021-03-31	2020-01-01	2021-03-27	By Total			Massachusetts	Male	25-34 years	19	1041	16			29	One or more data cells have counts between 1-9 and have been suppressed in accordance with NCHS confidentiality standards.
2021-03-31	2020-01-01	2021-03-27	By Total			Massachusetts	Male	30-39 years	31	1296	34	12		58	One or more data cells have counts between 1-9 and have been suppressed in accordance with NCHS confidentiality standards.
2021-03-31	2020-01-01	2021-03-27	By Total			Massachusetts	Male	35-44 years	60	1469	58	17		104	One or more data cells have counts between 1-9 and have been suppressed in accordance with NCHS confidentiality standards.
2021-03-31	2020-01-01	2021-03-27	By Total			Massachusetts	Male	40-49 years	109	1695	73	35		152	One or more data cells have counts between 1-9 and have been suppressed in accordance with NCHS confidentiality standards.
2021-03-31	2020-01-01	2021-03-27	By Total			Massachusetts	Male	45-54 years	177	2474	132	69	10	250
2021-03-31	2020-01-01	2021-03-27	By Total			Massachusetts	Male	50-64 years	732	7265	635	341	31	1055
2021-03-31	2020-01-01	2021-03-27	By Total			Massachusetts	Male	55-64 years	620	5720	542	295	26	891
2021-03-31	2020-01-01	2021-03-27	By Total			Massachusetts	Male	65-74 years	1292	8719	1108	595	24	1829
2021-03-31	2020-01-01	2021-03-27	By Total			Massachusetts	Male	75-84 years	1882	10347	1510	839	31	2583
2021-03-31	2020-01-01	2021-03-27	By Total			Massachusetts	Male	85 years and over	2291	11921	1718	925	23	3105
2021-03-31	2020-01-01	2021-03-27	By Total			Massachusetts	Female	All Ages	6471	41974	4386	2315	98	8633
2021-03-31	2020-01-01	2021-03-27	By Total			Massachusetts	Female	Under 1 year	0	138	0	0	0	0
2021-03-31	2020-01-01	2021-03-27	By Total			Massachusetts	Female	0-17 years		216		0	0		One or more data cells have counts between 1-9 and have been suppressed in accordance with NCHS confidentiality standards.
2021-03-31	2020-01-01	2021-03-27	By Total			Massachusetts	Female	1-4 years	0	18	0	0	0	0
2021-03-31	2020-01-01	2021-03-27	By Total			Massachusetts	Female	5-14 years	0	30		0	0		One or more data cells have counts between 1-9 and have been suppressed in accordance with NCHS confidentiality standards.
2021-03-31	2020-01-01	2021-03-27	By Total			Massachusetts	Female	15-24 years		160					One or more data cells have counts between 1-9 and have been suppressed in accordance with NCHS confidentiality standards.
2021-03-31	2020-01-01	2021-03-27	By Total			Massachusetts	Female	18-29 years		300				12	One or more data cells have counts between 1-9 and have been suppressed in accordance with NCHS confidentiality standards.
2021-03-31	2020-01-01	2021-03-27	By Total			Massachusetts	Female	25-34 years		447	14			20	One or more data cells have counts between 1-9 and have been suppressed in accordance with NCHS confidentiality standards.
2021-03-31	2020-01-01	2021-03-27	By Total			Massachusetts	Female	30-39 years	14	608	16			25	One or more data cells have counts between 1-9 and have been suppressed in accordance with NCHS confidentiality standards.
2021-03-31	2020-01-01	2021-03-27	By Total			Massachusetts	Female	35-44 years	25	714	23	10	0	38
2021-03-31	2020-01-01	2021-03-27	By Total			Massachusetts	Female	40-49 years	43	881	41	17		69	One or more data cells have counts between 1-9 and have been suppressed in accordance with NCHS confidentiality standards.
2021-03-31	2020-01-01	2021-03-27	By Total			Massachusetts	Female	45-54 years	97	1363	87	32		157	One or more data cells have counts between 1-9 and have been suppressed in accordance with NCHS confidentiality standards.
2021-03-31	2020-01-01	2021-03-27	By Total			Massachusetts	Female	50-64 years	412	4245	366	181	15	608
2021-03-31	2020-01-01	2021-03-27	By Total			Massachusetts	Female	55-64 years	343	3380	305	160	11	496
2021-03-31	2020-01-01	2021-03-27	By Total			Massachusetts	Female	65-74 years	822	6242	667	360	14	1142
2021-03-31	2020-01-01	2021-03-27	By Total			Massachusetts	Female	75-84 years	1626	9945	1233	675	25	2209
2021-03-31	2020-01-01	2021-03-27	By Total			Massachusetts	Female	85 years and over	3546	19537	2055	1073	40	4566
2021-03-31	2020-01-01	2021-03-27	By Total			Michigan	All Sexes	All Ages	14831	138506	13738	7306	287	21535
2021-03-31	2020-01-01	2021-03-27	By Total			Michigan	All Sexes	Under 1 year	0	806		0	0		One or more data cells have counts between 1-9 and have been suppressed in accordance with NCHS confidentiality standards.
2021-03-31	2020-01-01	2021-03-27	By Total			Michigan	All Sexes	0-17 years		1308	18	0		29	One or more data cells have counts between 1-9 and have been suppressed in accordance with NCHS confidentiality standards.
2021-03-31	2020-01-01	2021-03-27	By Total			Michigan	All Sexes	1-4 years	0	112		0			One or more data cells have counts between 1-9 and have been suppressed in accordance with NCHS confidentiality standards.
2021-03-31	2020-01-01	2021-03-27	By Total			Michigan	All Sexes	5-14 years		204		0		10	One or more data cells have counts between 1-9 and have been suppressed in accordance with NCHS confidentiality standards.
2021-03-31	2020-01-01	2021-03-27	By Total			Michigan	All Sexes	15-24 years	18	1181	32			44	One or more data cells have counts between 1-9 and have been suppressed in accordance with NCHS confidentiality standards.
2021-03-31	2020-01-01	2021-03-27	By Total			Michigan	All Sexes	18-29 years	51	2157	74	24		105	One or more data cells have counts between 1-9 and have been suppressed in accordance with NCHS confidentiality standards.
2021-03-31	2020-01-01	2021-03-27	By Total			Michigan	All Sexes	25-34 years	73	2642	99	29		149	One or more data cells have counts between 1-9 and have been suppressed in accordance with NCHS confidentiality standards.
2021-03-31	2020-01-01	2021-03-27	By Total			Michigan	All Sexes	30-39 years	94	3158	128	39		190	One or more data cells have counts between 1-9 and have been suppressed in accordance with NCHS confidentiality standards.
2021-03-31	2020-01-01	2021-03-27	By Total			Michigan	All Sexes	35-44 years	175	3690	197	81		298	One or more data cells have counts between 1-9 and have been suppressed in accordance with NCHS confidentiality standards.
2021-03-31	2020-01-01	2021-03-27	By Total			Michigan	All Sexes	40-49 years	368	4928	358	187		548	One or more data cells have counts between 1-9 and have been suppressed in accordance with NCHS confidentiality standards.
2021-03-31	2020-01-01	2021-03-27	By Total			Michigan	All Sexes	45-54 years	603	7348	592	332	25	888
2021-03-31	2020-01-01	2021-03-27	By Total			Michigan	All Sexes	50-64 years	1960	22245	2111	1098	75	3048
2021-03-31	2020-01-01	2021-03-27	By Total			Michigan	All Sexes	55-64 years	1606	17813	1755	898	55	2518
2021-03-31	2020-01-01	2021-03-27	By Total			Michigan	All Sexes	65-74 years	3365	28334	3288	1832	74	4888
2021-03-31	2020-01-01	2021-03-27	By Total			Michigan	All Sexes	75-84 years	4276	33926	3885	2162	60	6053
2021-03-31	2020-01-01	2021-03-27	By Total			Michigan	All Sexes	85 years and over	4712	42450	3876	1964	51	6674
2021-03-31	2020-01-01	2021-03-27	By Total			Michigan	Male	All Ages	7966	71550	7587	4171	141	11513
2021-03-31	2020-01-01	2021-03-27	By Total			Michigan	Male	Under 1 year	0	428		0	0		One or more data cells have counts between 1-9 and have been suppressed in accordance with NCHS confidentiality standards.
2021-03-31	2020-01-01	2021-03-27	By Total			Michigan	Male	0-17 years		728	10	0		14	One or more data cells have counts between 1-9 and have been suppressed in accordance with NCHS confidentiality standards.
2021-03-31	2020-01-01	2021-03-27	By Total			Michigan	Male	1-4 years	0	62		0			One or more data cells have counts between 1-9 and have been suppressed in accordance with NCHS confidentiality standards.
2021-03-31	2020-01-01	2021-03-27	By Total			Michigan	Male	5-14 years	0	116	0	0			One or more data cells have counts between 1-9 and have been suppressed in accordance with NCHS confidentiality standards.
2021-03-31	2020-01-01	2021-03-27	By Total			Michigan	Male	15-24 years	10	849	23		0	29	One or more data cells have counts between 1-9 and have been suppressed in accordance with NCHS confidentiality standards.
2021-03-31	2020-01-01	2021-03-27	By Total			Michigan	Male	18-29 years	30	1543	46	12		65	One or more data cells have counts between 1-9 and have been suppressed in accordance with NCHS confidentiality standards.
2021-03-31	2020-01-01	2021-03-27	By Total			Michigan	Male	25-34 years	47	1836	60	17		93	One or more data cells have counts between 1-9 and have been suppressed in accordance with NCHS confidentiality standards.
2021-03-31	2020-01-01	2021-03-27	By Total			Michigan	Male	30-39 years	64	2101	73	26		115	One or more data cells have counts between 1-9 and have been suppressed in accordance with NCHS confidentiality standards.
2021-03-31	2020-01-01	2021-03-27	By Total			Michigan	Male	35-44 years	110	2365	109	51		173	One or more data cells have counts between 1-9 and have been suppressed in accordance with NCHS confidentiality standards.
2021-03-31	2020-01-01	2021-03-27	By Total			Michigan	Male	40-49 years	231	3127	219	120		337	One or more data cells have counts between 1-9 and have been suppressed in accordance with NCHS confidentiality standards.
2021-03-31	2020-01-01	2021-03-27	By Total			Michigan	Male	45-54 years	395	4600	366	218	15	558
2021-03-31	2020-01-01	2021-03-27	By Total			Michigan	Male	50-64 years	1235	13701	1271	687	36	1855
2021-03-31	2020-01-01	2021-03-27	By Total			Michigan	Male	55-64 years	999	10944	1054	555	25	1523
2021-03-31	2020-01-01	2021-03-27	By Total			Michigan	Male	65-74 years	2026	16332	1926	1105	40	2882
2021-03-31	2020-01-01	2021-03-27	By Total			Michigan	Male	75-84 years	2418	17564	2254	1287	27	3408
2021-03-31	2020-01-01	2021-03-27	By Total			Michigan	Male	85 years and over	1961	16454	1788	934	23	2837
2021-03-31	2020-01-01	2021-03-27	By Total			Michigan	Female	All Ages	6865	66956	6151	3135	146	10022
2021-03-31	2020-01-01	2021-03-27	By Total			Michigan	Female	Under 1 year	0	378		0	0		One or more data cells have counts between 1-9 and have been suppressed in accordance with NCHS confidentiality standards.
2021-03-31	2020-01-01	2021-03-27	By Total			Michigan	Female	0-17 years		580		0		15	One or more data cells have counts between 1-9 and have been suppressed in accordance with NCHS confidentiality standards.
2021-03-31	2020-01-01	2021-03-27	By Total			Michigan	Female	1-4 years	0	50		0			One or more data cells have counts between 1-9 and have been suppressed in accordance with NCHS confidentiality standards.
2021-03-31	2020-01-01	2021-03-27	By Total			Michigan	Female	5-14 years		88		0			One or more data cells have counts between 1-9 and have been suppressed in accordance with NCHS confidentiality standards.
2021-03-31	2020-01-01	2021-03-27	By Total			Michigan	Female	15-24 years		332				15	One or more data cells have counts between 1-9 and have been suppressed in accordance with NCHS confidentiality standards.
2021-03-31	2020-01-01	2021-03-27	By Total			Michigan	Female	18-29 years	21	614	28	12		40	One or more data cells have counts between 1-9 and have been suppressed in accordance with NCHS confidentiality standards.
2021-03-31	2020-01-01	2021-03-27	By Total			Michigan	Female	25-34 years	26	806	39	12		56	One or more data cells have counts between 1-9 and have been suppressed in accordance with NCHS confidentiality standards.
2021-03-31	2020-01-01	2021-03-27	By Total			Michigan	Female	30-39 years	30	1057	55	13		75	One or more data cells have counts between 1-9 and have been suppressed in accordance with NCHS confidentiality standards.
2021-03-31	2020-01-01	2021-03-27	By Total			Michigan	Female	35-44 years	65	1325	88	30		125	One or more data cells have counts between 1-9 and have been suppressed in accordance with NCHS confidentiality standards.
2021-03-31	2020-01-01	2021-03-27	By Total			Michigan	Female	40-49 years	137	1801	139	67		211	One or more data cells have counts between 1-9 and have been suppressed in accordance with NCHS confidentiality standards.
2021-03-31	2020-01-01	2021-03-27	By Total			Michigan	Female	45-54 years	208	2748	226	114	10	330
2021-03-31	2020-01-01	2021-03-27	By Total			Michigan	Female	50-64 years	725	8544	840	411	39	1193
2021-03-31	2020-01-01	2021-03-27	By Total			Michigan	Female	55-64 years	607	6869	701	343	30	995
2021-03-31	2020-01-01	2021-03-27	By Total			Michigan	Female	65-74 years	1339	12002	1362	727	34	2006
2021-03-31	2020-01-01	2021-03-27	By Total			Michigan	Female	75-84 years	1858	16362	1631	875	33	2645
2021-03-31	2020-01-01	2021-03-27	By Total			Michigan	Female	85 years and over	2751	25996	2088	1030	28	3837
2021-03-31	2020-01-01	2021-03-27	By Total			Minnesota	All Sexes	All Ages	7035	62159	5361	2385	155	10161
2021-03-31	2020-01-01	2021-03-27	By Total			Minnesota	All Sexes	Under 1 year		331		0	0		One or more data cells have counts between 1-9 and have been suppressed in accordance with NCHS confidentiality standards.
2021-03-31	2020-01-01	2021-03-27	By Total			Minnesota	All Sexes	0-17 years		606	18	0		22	One or more data cells have counts between 1-9 and have been suppressed in accordance with NCHS confidentiality standards.
2021-03-31	2020-01-01	2021-03-27	By Total			Minnesota	All Sexes	1-4 years	0	79		0			One or more data cells have counts between 1-9 and have been suppressed in accordance with NCHS confidentiality standards.
2021-03-31	2020-01-01	2021-03-27	By Total			Minnesota	All Sexes	5-14 years		93		0	0		One or more data cells have counts between 1-9 and have been suppressed in accordance with NCHS confidentiality standards.
2021-03-31	2020-01-01	2021-03-27	By Total			Minnesota	All Sexes	15-24 years		532	12	0	0	18	One or more data cells have counts between 1-9 and have been suppressed in accordance with NCHS confidentiality standards.
2021-03-31	2020-01-01	2021-03-27	By Total			Minnesota	All Sexes	18-29 years	13	911	20			32	One or more data cells have counts between 1-9 and have been suppressed in accordance with NCHS confidentiality standards.
2021-03-31	2020-01-01	2021-03-27	By Total			Minnesota	All Sexes	25-34 years	22	1096	33			54	One or more data cells have counts between 1-9 and have been suppressed in accordance with NCHS confidentiality standards.
2021-03-31	2020-01-01	2021-03-27	By Total			Minnesota	All Sexes	30-39 years	42	1289	46	15		82	One or more data cells have counts between 1-9 and have been suppressed in accordance with NCHS confidentiality standards.
2021-03-31	2020-01-01	2021-03-27	By Total			Minnesota	All Sexes	35-44 years	57	1466	64	20		106	One or more data cells have counts between 1-9 and have been suppressed in accordance with NCHS confidentiality standards.
2021-03-31	2020-01-01	2021-03-27	By Total			Minnesota	All Sexes	40-49 years	98	1813	116	38		180	One or more data cells have counts between 1-9 and have been suppressed in accordance with NCHS confidentiality standards.
2021-03-31	2020-01-01	2021-03-27	By Total			Minnesota	All Sexes	45-54 years	182	2728	193	70	10	315
2021-03-31	2020-01-01	2021-03-27	By Total			Minnesota	All Sexes	50-64 years	590	8414	614	252	36	988
2021-03-31	2020-01-01	2021-03-27	By Total			Minnesota	All Sexes	55-64 years	476	6708	498	210	29	793
2021-03-31	2020-01-01	2021-03-27	By Total			Minnesota	All Sexes	65-74 years	1143	11113	1039	494	36	1721
2021-03-31	2020-01-01	2021-03-27	By Total			Minnesota	All Sexes	75-84 years	1965	15458	1512	694	31	2814
2021-03-31	2020-01-01	2021-03-27	By Total			Minnesota	All Sexes	85 years and over	3181	22555	1996	890	37	4322
2021-03-31	2020-01-01	2021-03-27	By Total			Minnesota	Male	All Ages	3634	31722	2902	1363	81	5251
2021-03-31	2020-01-01	2021-03-27	By Total			Minnesota	Male	Under 1 year	0	195		0	0		One or more data cells have counts between 1-9 and have been suppressed in accordance with NCHS confidentiality standards.
2021-03-31	2020-01-01	2021-03-27	By Total			Minnesota	Male	0-17 years	0	365		0		10	One or more data cells have counts between 1-9 and have been suppressed in accordance with NCHS confidentiality standards.
2021-03-31	2020-01-01	2021-03-27	By Total			Minnesota	Male	1-4 years	0	46		0			One or more data cells have counts between 1-9 and have been suppressed in accordance with NCHS confidentiality standards.
2021-03-31	2020-01-01	2021-03-27	By Total			Minnesota	Male	5-14 years	0	59		0	0		One or more data cells have counts between 1-9 and have been suppressed in accordance with NCHS confidentiality standards.
2021-03-31	2020-01-01	2021-03-27	By Total			Minnesota	Male	15-24 years		379		0	0		One or more data cells have counts between 1-9 and have been suppressed in accordance with NCHS confidentiality standards.
2021-03-31	2020-01-01	2021-03-27	By Total			Minnesota	Male	18-29 years		662	10			18	One or more data cells have counts between 1-9 and have been suppressed in accordance with NCHS confidentiality standards.
2021-03-31	2020-01-01	2021-03-27	By Total			Minnesota	Male	25-34 years	13	752	22			32	One or more data cells have counts between 1-9 and have been suppressed in accordance with NCHS confidentiality standards.
2021-03-31	2020-01-01	2021-03-27	By Total			Minnesota	Male	30-39 years	26	843	35	12		53	One or more data cells have counts between 1-9 and have been suppressed in accordance with NCHS confidentiality standards.
2021-03-31	2020-01-01	2021-03-27	By Total			Minnesota	Male	35-44 years	35	919	45	15		68	One or more data cells have counts between 1-9 and have been suppressed in accordance with NCHS confidentiality standards.
2021-03-31	2020-01-01	2021-03-27	By Total			Minnesota	Male	40-49 years	64	1103	70	27		108	One or more data cells have counts between 1-9 and have been suppressed in accordance with NCHS confidentiality standards.
2021-03-31	2020-01-01	2021-03-27	By Total			Minnesota	Male	45-54 years	120	1699	113	49		190	One or more data cells have counts between 1-9 and have been suppressed in accordance with NCHS confidentiality standards.
2021-03-31	2020-01-01	2021-03-27	By Total			Minnesota	Male	50-64 years	387	5218	350	161	18	594
2021-03-31	2020-01-01	2021-03-27	By Total			Minnesota	Male	55-64 years	314	4142	283	133	13	477
2021-03-31	2020-01-01	2021-03-27	By Total			Minnesota	Male	65-74 years	689	6522	632	318	20	1021
2021-03-31	2020-01-01	2021-03-27	By Total			Minnesota	Male	75-84 years	1122	8023	855	407	19	1589
2021-03-31	2020-01-01	2021-03-27	By Total			Minnesota	Male	85 years and over	1337	8986	941	436	17	1858
2021-03-31	2020-01-01	2021-03-27	By Total			Minnesota	Female	All Ages	3401	30437	2459	1022	74	4910
2021-03-31	2020-01-01	2021-03-27	By Total			Minnesota	Female	Under 1 year		136		0	0		One or more data cells have counts between 1-9 and have been suppressed in accordance with NCHS confidentiality standards.
2021-03-31	2020-01-01	2021-03-27	By Total			Minnesota	Female	0-17 years		241		0	0	12	One or more data cells have counts between 1-9 and have been suppressed in accordance with NCHS confidentiality standards.
2021-03-31	2020-01-01	2021-03-27	By Total			Minnesota	Female	1-4 years	0	33		0	0		One or more data cells have counts between 1-9 and have been suppressed in accordance with NCHS confidentiality standards.
2021-03-31	2020-01-01	2021-03-27	By Total			Minnesota	Female	5-14 years		34		0	0		One or more data cells have counts between 1-9 and have been suppressed in accordance with NCHS confidentiality standards.
2021-03-31	2020-01-01	2021-03-27	By Total			Minnesota	Female	15-24 years		153		0	0	10	One or more data cells have counts between 1-9 and have been suppressed in accordance with NCHS confidentiality standards.
2021-03-31	2020-01-01	2021-03-27	By Total			Minnesota	Female	18-29 years		249	10	0	0	14	One or more data cells have counts between 1-9 and have been suppressed in accordance with NCHS confidentiality standards.
2021-03-31	2020-01-01	2021-03-27	By Total			Minnesota	Female	25-34 years		344	11			22	One or more data cells have counts between 1-9 and have been suppressed in accordance with NCHS confidentiality standards.
2021-03-31	2020-01-01	2021-03-27	By Total			Minnesota	Female	30-39 years	16	446	11			29	One or more data cells have counts between 1-9 and have been suppressed in accordance with NCHS confidentiality standards.
2021-03-31	2020-01-01	2021-03-27	By Total			Minnesota	Female	35-44 years	22	547	19			38	One or more data cells have counts between 1-9 and have been suppressed in accordance with NCHS confidentiality standards.
2021-03-31	2020-01-01	2021-03-27	By Total			Minnesota	Female	40-49 years	34	710	46	11		72	One or more data cells have counts between 1-9 and have been suppressed in accordance with NCHS confidentiality standards.
2021-03-31	2020-01-01	2021-03-27	By Total			Minnesota	Female	45-54 years	62	1029	80	21		125	One or more data cells have counts between 1-9 and have been suppressed in accordance with NCHS confidentiality standards.
2021-03-31	2020-01-01	2021-03-27	By Total			Minnesota	Female	50-64 years	203	3196	264	91	18	394
2021-03-31	2020-01-01	2021-03-27	By Total			Minnesota	Female	55-64 years	162	2566	215	77	16	316
2021-03-31	2020-01-01	2021-03-27	By Total			Minnesota	Female	65-74 years	454	4591	407	176	16	700
2021-03-31	2020-01-01	2021-03-27	By Total			Minnesota	Female	75-84 years	843	7435	657	287	12	1225
2021-03-31	2020-01-01	2021-03-27	By Total			Minnesota	Female	85 years and over	1844	13569	1055	454	20	2464
2021-03-31	2020-01-01	2021-03-27	By Total			Mississippi	All Sexes	All Ages	7064	48194	6679	3806	77	10004
2021-03-31	2020-01-01	2021-03-27	By Total			Mississippi	All Sexes	Under 1 year	0	257		0	0		One or more data cells have counts between 1-9 and have been suppressed in accordance with NCHS confidentiality standards.
2021-03-31	2020-01-01	2021-03-27	By Total			Mississippi	All Sexes	0-17 years		504				10	One or more data cells have counts between 1-9 and have been suppressed in accordance with NCHS confidentiality standards.
2021-03-31	2020-01-01	2021-03-27	By Total			Mississippi	All Sexes	1-4 years	0	54		0			One or more data cells have counts between 1-9 and have been suppressed in accordance with NCHS confidentiality standards.
2021-03-31	2020-01-01	2021-03-27	By Total			Mississippi	All Sexes	5-14 years		105					One or more data cells have counts between 1-9 and have been suppressed in accordance with NCHS confidentiality standards.
2021-03-31	2020-01-01	2021-03-27	By Total			Mississippi	All Sexes	15-24 years	16	567	15		0	22	One or more data cells have counts between 1-9 and have been suppressed in accordance with NCHS confidentiality standards.
2021-03-31	2020-01-01	2021-03-27	By Total			Mississippi	All Sexes	18-29 years	36	931	37	23		51	One or more data cells have counts between 1-9 and have been suppressed in accordance with NCHS confidentiality standards.
2021-03-31	2020-01-01	2021-03-27	By Total			Mississippi	All Sexes	25-34 years	61	1067	62	32		94	One or more data cells have counts between 1-9 and have been suppressed in accordance with NCHS confidentiality standards.
2021-03-31	2020-01-01	2021-03-27	By Total			Mississippi	All Sexes	30-39 years	107	1359	92	48		155	One or more data cells have counts between 1-9 and have been suppressed in accordance with NCHS confidentiality standards.
2021-03-31	2020-01-01	2021-03-27	By Total			Mississippi	All Sexes	35-44 years	150	1755	142	74		224	One or more data cells have counts between 1-9 and have been suppressed in accordance with NCHS confidentiality standards.
2021-03-31	2020-01-01	2021-03-27	By Total			Mississippi	All Sexes	40-49 years	240	2334	224	113		357	One or more data cells have counts between 1-9 and have been suppressed in accordance with NCHS confidentiality standards.
2021-03-31	2020-01-01	2021-03-27	By Total			Mississippi	All Sexes	45-54 years	393	3169	360	203		555	One or more data cells have counts between 1-9 and have been suppressed in accordance with NCHS confidentiality standards.
2021-03-31	2020-01-01	2021-03-27	By Total			Mississippi	All Sexes	50-64 years	1244	9303	1273	709	21	1827
2021-03-31	2020-01-01	2021-03-27	By Total			Mississippi	All Sexes	55-64 years	1007	7457	1047	575	18	1495
2021-03-31	2020-01-01	2021-03-27	By Total			Mississippi	All Sexes	65-74 years	1816	10957	1749	1038	15	2540
2021-03-31	2020-01-01	2021-03-27	By Total			Mississippi	All Sexes	75-84 years	1985	11768	1842	1106	19	2738
2021-03-31	2020-01-01	2021-03-27	By Total			Mississippi	All Sexes	85 years and over	1635	11038	1455	768		2326	One or more data cells have counts between 1-9 and have been suppressed in accordance with NCHS confidentiality standards.
2021-03-31	2020-01-01	2021-03-27	By Total			Mississippi	Male	All Ages	3701	25233	3639	2069	44	5308
2021-03-31	2020-01-01	2021-03-27	By Total			Mississippi	Male	Under 1 year	0	145		0	0		One or more data cells have counts between 1-9 and have been suppressed in accordance with NCHS confidentiality standards.
2021-03-31	2020-01-01	2021-03-27	By Total			Mississippi	Male	0-17 years		309					One or more data cells have counts between 1-9 and have been suppressed in accordance with NCHS confidentiality standards.
2021-03-31	2020-01-01	2021-03-27	By Total			Mississippi	Male	1-4 years	0	34		0			One or more data cells have counts between 1-9 and have been suppressed in accordance with NCHS confidentiality standards.
2021-03-31	2020-01-01	2021-03-27	By Total			Mississippi	Male	5-14 years		62					One or more data cells have counts between 1-9 and have been suppressed in accordance with NCHS confidentiality standards.
2021-03-31	2020-01-01	2021-03-27	By Total			Mississippi	Male	15-24 years		432	10		0	13	One or more data cells have counts between 1-9 and have been suppressed in accordance with NCHS confidentiality standards.
2021-03-31	2020-01-01	2021-03-27	By Total			Mississippi	Male	18-29 years	16	686	20	10		27	One or more data cells have counts between 1-9 and have been suppressed in accordance with NCHS confidentiality standards.
2021-03-31	2020-01-01	2021-03-27	By Total			Mississippi	Male	25-34 years	31	730	32	13		51	One or more data cells have counts between 1-9 and have been suppressed in accordance with NCHS confidentiality standards.
2021-03-31	2020-01-01	2021-03-27	By Total			Mississippi	Male	30-39 years	56	885	48	21		84	One or more data cells have counts between 1-9 and have been suppressed in accordance with NCHS confidentiality standards.
2021-03-31	2020-01-01	2021-03-27	By Total			Mississippi	Male	35-44 years	76	1107	80	37		121	One or more data cells have counts between 1-9 and have been suppressed in accordance with NCHS confidentiality standards.
2021-03-31	2020-01-01	2021-03-27	By Total			Mississippi	Male	40-49 years	122	1405	119	59		185	One or more data cells have counts between 1-9 and have been suppressed in accordance with NCHS confidentiality standards.
2021-03-31	2020-01-01	2021-03-27	By Total			Mississippi	Male	45-54 years	212	1896	197	114		298	One or more data cells have counts between 1-9 and have been suppressed in accordance with NCHS confidentiality standards.
2021-03-31	2020-01-01	2021-03-27	By Total			Mississippi	Male	50-64 years	680	5630	733	380	10	1041
2021-03-31	2020-01-01	2021-03-27	By Total			Mississippi	Male	55-64 years	546	4509	601	300		854	One or more data cells have counts between 1-9 and have been suppressed in accordance with NCHS confidentiality standards.
2021-03-31	2020-01-01	2021-03-27	By Total			Mississippi	Male	65-74 years	1048	6281	1017	610	12	1465
2021-03-31	2020-01-01	2021-03-27	By Total			Mississippi	Male	75-84 years	1108	5972	1043	639	12	1523
2021-03-31	2020-01-01	2021-03-27	By Total			Mississippi	Male	85 years and over	670	4065	655	349		977	One or more data cells have counts between 1-9 and have been suppressed in accordance with NCHS confidentiality standards.
2021-03-31	2020-01-01	2021-03-27	By Total			Mississippi	Female	All Ages	3363	22961	3040	1737	33	4696
2021-03-31	2020-01-01	2021-03-27	By Total			Mississippi	Female	Under 1 year	0	112		0	0		One or more data cells have counts between 1-9 and have been suppressed in accordance with NCHS confidentiality standards.
2021-03-31	2020-01-01	2021-03-27	By Total			Mississippi	Female	0-17 years	0	195		0			One or more data cells have counts between 1-9 and have been suppressed in accordance with NCHS confidentiality standards.
2021-03-31	2020-01-01	2021-03-27	By Total			Mississippi	Female	1-4 years	0	20	0	0	0	0
2021-03-31	2020-01-01	2021-03-27	By Total			Mississippi	Female	5-14 years	0	43		0			One or more data cells have counts between 1-9 and have been suppressed in accordance with NCHS confidentiality standards.
2021-03-31	2020-01-01	2021-03-27	By Total			Mississippi	Female	15-24 years		135			0		One or more data cells have counts between 1-9 and have been suppressed in accordance with NCHS confidentiality standards.
2021-03-31	2020-01-01	2021-03-27	By Total			Mississippi	Female	18-29 years	20	245	17	13	0	24
2021-03-31	2020-01-01	2021-03-27	By Total			Mississippi	Female	25-34 years	30	337	30	19		43	One or more data cells have counts between 1-9 and have been suppressed in accordance with NCHS confidentiality standards.
2021-03-31	2020-01-01	2021-03-27	By Total			Mississippi	Female	30-39 years	51	474	44	27		71	One or more data cells have counts between 1-9 and have been suppressed in accordance with NCHS confidentiality standards.
2021-03-31	2020-01-01	2021-03-27	By Total			Mississippi	Female	35-44 years	74	648	62	37		103	One or more data cells have counts between 1-9 and have been suppressed in accordance with NCHS confidentiality standards.
2021-03-31	2020-01-01	2021-03-27	By Total			Mississippi	Female	40-49 years	118	929	105	54		172	One or more data cells have counts between 1-9 and have been suppressed in accordance with NCHS confidentiality standards.
2021-03-31	2020-01-01	2021-03-27	By Total			Mississippi	Female	45-54 years	181	1273	163	89		257	One or more data cells have counts between 1-9 and have been suppressed in accordance with NCHS confidentiality standards.
2021-03-31	2020-01-01	2021-03-27	By Total			Mississippi	Female	50-64 years	564	3673	540	329	11	786
2021-03-31	2020-01-01	2021-03-27	By Total			Mississippi	Female	55-64 years	461	2948	446	275		641	One or more data cells have counts between 1-9 and have been suppressed in accordance with NCHS confidentiality standards.
2021-03-31	2020-01-01	2021-03-27	By Total			Mississippi	Female	65-74 years	768	4676	732	428		1075	One or more data cells have counts between 1-9 and have been suppressed in accordance with NCHS confidentiality standards.
2021-03-31	2020-01-01	2021-03-27	By Total			Mississippi	Female	75-84 years	877	5796	799	467		1215	One or more data cells have counts between 1-9 and have been suppressed in accordance with NCHS confidentiality standards.
2021-03-31	2020-01-01	2021-03-27	By Total			Mississippi	Female	85 years and over	965	6973	800	419		1349	One or more data cells have counts between 1-9 and have been suppressed in accordance with NCHS confidentiality standards.
2021-03-31	2020-01-01	2021-03-27	By Total			Missouri	All Sexes	All Ages	10361	91724	8665	4549	217	14686
2021-03-31	2020-01-01	2021-03-27	By Total			Missouri	All Sexes	Under 1 year		533		0	0		One or more data cells have counts between 1-9 and have been suppressed in accordance with NCHS confidentiality standards.
2021-03-31	2020-01-01	2021-03-27	By Total			Missouri	All Sexes	0-17 years		989	21	0		32	One or more data cells have counts between 1-9 and have been suppressed in accordance with NCHS confidentiality standards.
2021-03-31	2020-01-01	2021-03-27	By Total			Missouri	All Sexes	1-4 years	0	116		0			One or more data cells have counts between 1-9 and have been suppressed in accordance with NCHS confidentiality standards.
2021-03-31	2020-01-01	2021-03-27	By Total			Missouri	All Sexes	5-14 years		163		0		12	One or more data cells have counts between 1-9 and have been suppressed in accordance with NCHS confidentiality standards.
2021-03-31	2020-01-01	2021-03-27	By Total			Missouri	All Sexes	15-24 years	13	1033	13			27	One or more data cells have counts between 1-9 and have been suppressed in accordance with NCHS confidentiality standards.
2021-03-31	2020-01-01	2021-03-27	By Total			Missouri	All Sexes	18-29 years	25	1811	28	10		48	One or more data cells have counts between 1-9 and have been suppressed in accordance with NCHS confidentiality standards.
2021-03-31	2020-01-01	2021-03-27	By Total			Missouri	All Sexes	25-34 years	33	1991	36	11		64	One or more data cells have counts between 1-9 and have been suppressed in accordance with NCHS confidentiality standards.
2021-03-31	2020-01-01	2021-03-27	By Total			Missouri	All Sexes	30-39 years	54	2300	54	20		95	One or more data cells have counts between 1-9 and have been suppressed in accordance with NCHS confidentiality standards.
2021-03-31	2020-01-01	2021-03-27	By Total			Missouri	All Sexes	35-44 years	110	2733	108	40		184	One or more data cells have counts between 1-9 and have been suppressed in accordance with NCHS confidentiality standards.
2021-03-31	2020-01-01	2021-03-27	By Total			Missouri	All Sexes	40-49 years	188	3353	176	70	10	304
2021-03-31	2020-01-01	2021-03-27	By Total			Missouri	All Sexes	45-54 years	298	4732	304	139	16	479
2021-03-31	2020-01-01	2021-03-27	By Total			Missouri	All Sexes	50-64 years	1232	15087	1225	609	47	1893
2021-03-31	2020-01-01	2021-03-27	By Total			Missouri	All Sexes	55-64 years	1047	12239	1023	514	38	1592
2021-03-31	2020-01-01	2021-03-27	By Total			Missouri	All Sexes	65-74 years	2178	18933	1937	1047	42	3108
2021-03-31	2020-01-01	2021-03-27	By Total			Missouri	All Sexes	75-84 years	2997	22891	2587	1435	56	4203
2021-03-31	2020-01-01	2021-03-27	By Total			Missouri	All Sexes	85 years and over	3683	26360	2637	1358	43	5003
2021-03-31	2020-01-01	2021-03-27	By Total			Missouri	Male	All Ages	5416	47848	4752	2545	110	7727
2021-03-31	2020-01-01	2021-03-27	By Total			Missouri	Male	Under 1 year	0	291		0	0		One or more data cells have counts between 1-9 and have been suppressed in accordance with NCHS confidentiality standards.
2021-03-31	2020-01-01	2021-03-27	By Total			Missouri	Male	0-17 years		590	11	0		17	One or more data cells have counts between 1-9 and have been suppressed in accordance with NCHS confidentiality standards.
2021-03-31	2020-01-01	2021-03-27	By Total			Missouri	Male	1-4 years	0	66		0			One or more data cells have counts between 1-9 and have been suppressed in accordance with NCHS confidentiality standards.
2021-03-31	2020-01-01	2021-03-27	By Total			Missouri	Male	5-14 years		102		0	0		One or more data cells have counts between 1-9 and have been suppressed in accordance with NCHS confidentiality standards.
2021-03-31	2020-01-01	2021-03-27	By Total			Missouri	Male	15-24 years		743				14	One or more data cells have counts between 1-9 and have been suppressed in accordance with NCHS confidentiality standards.
2021-03-31	2020-01-01	2021-03-27	By Total			Missouri	Male	18-29 years	15	1301	20			31	One or more data cells have counts between 1-9 and have been suppressed in accordance with NCHS confidentiality standards.
2021-03-31	2020-01-01	2021-03-27	By Total			Missouri	Male	25-34 years	19	1428	26			46	One or more data cells have counts between 1-9 and have been suppressed in accordance with NCHS confidentiality standards.
2021-03-31	2020-01-01	2021-03-27	By Total			Missouri	Male	30-39 years	33	1561	33	12		57	One or more data cells have counts between 1-9 and have been suppressed in accordance with NCHS confidentiality standards.
2021-03-31	2020-01-01	2021-03-27	By Total			Missouri	Male	35-44 years	67	1771	61	28		101	One or more data cells have counts between 1-9 and have been suppressed in accordance with NCHS confidentiality standards.
2021-03-31	2020-01-01	2021-03-27	By Total			Missouri	Male	40-49 years	109	2111	96	41		171	One or more data cells have counts between 1-9 and have been suppressed in accordance with NCHS confidentiality standards.
2021-03-31	2020-01-01	2021-03-27	By Total			Missouri	Male	45-54 years	203	2935	187	95	10	305
2021-03-31	2020-01-01	2021-03-27	By Total			Missouri	Male	50-64 years	774	9227	759	378	30	1183
2021-03-31	2020-01-01	2021-03-27	By Total			Missouri	Male	55-64 years	636	7454	627	307	26	980
2021-03-31	2020-01-01	2021-03-27	By Total			Missouri	Male	65-74 years	1254	10845	1130	614	21	1790
2021-03-31	2020-01-01	2021-03-27	By Total			Missouri	Male	75-84 years	1708	11945	1475	849	24	2356
2021-03-31	2020-01-01	2021-03-27	By Total			Missouri	Male	85 years and over	1521	10268	1228	644	18	2122
2021-03-31	2020-01-01	2021-03-27	By Total			Missouri	Female	All Ages	4945	43876	3913	2004	107	6959
2021-03-31	2020-01-01	2021-03-27	By Total			Missouri	Female	Under 1 year		242		0	0		One or more data cells have counts between 1-9 and have been suppressed in accordance with NCHS confidentiality standards.
2021-03-31	2020-01-01	2021-03-27	By Total			Missouri	Female	0-17 years		399	10	0		15	One or more data cells have counts between 1-9 and have been suppressed in accordance with NCHS confidentiality standards.
2021-03-31	2020-01-01	2021-03-27	By Total			Missouri	Female	1-4 years	0	50		0	0		One or more data cells have counts between 1-9 and have been suppressed in accordance with NCHS confidentiality standards.
2021-03-31	2020-01-01	2021-03-27	By Total			Missouri	Female	5-14 years	0	61		0			One or more data cells have counts between 1-9 and have been suppressed in accordance with NCHS confidentiality standards.
2021-03-31	2020-01-01	2021-03-27	By Total			Missouri	Female	15-24 years		290				13	One or more data cells have counts between 1-9 and have been suppressed in accordance with NCHS confidentiality standards.
2021-03-31	2020-01-01	2021-03-27	By Total			Missouri	Female	18-29 years	10	510				17	One or more data cells have counts between 1-9 and have been suppressed in accordance with NCHS confidentiality standards.
2021-03-31	2020-01-01	2021-03-27	By Total			Missouri	Female	25-34 years	14	563	10			18	One or more data cells have counts between 1-9 and have been suppressed in accordance with NCHS confidentiality standards.
2021-03-31	2020-01-01	2021-03-27	By Total			Missouri	Female	30-39 years	21	739	21			38	One or more data cells have counts between 1-9 and have been suppressed in accordance with NCHS confidentiality standards.
2021-03-31	2020-01-01	2021-03-27	By Total			Missouri	Female	35-44 years	43	962	47	12		83	One or more data cells have counts between 1-9 and have been suppressed in accordance with NCHS confidentiality standards.
2021-03-31	2020-01-01	2021-03-27	By Total			Missouri	Female	40-49 years	79	1242	80	29		133	One or more data cells have counts between 1-9 and have been suppressed in accordance with NCHS confidentiality standards.
2021-03-31	2020-01-01	2021-03-27	By Total			Missouri	Female	45-54 years	95	1797	117	44		174	One or more data cells have counts between 1-9 and have been suppressed in accordance with NCHS confidentiality standards.
2021-03-31	2020-01-01	2021-03-27	By Total			Missouri	Female	50-64 years	458	5860	466	231	17	710
2021-03-31	2020-01-01	2021-03-27	By Total			Missouri	Female	55-64 years	411	4785	396	207	12	612
2021-03-31	2020-01-01	2021-03-27	By Total			Missouri	Female	65-74 years	924	8088	807	433	21	1318
2021-03-31	2020-01-01	2021-03-27	By Total			Missouri	Female	75-84 years	1289	10946	1112	586	32	1847
2021-03-31	2020-01-01	2021-03-27	By Total			Missouri	Female	85 years and over	2162	16092	1409	714	25	2881
2021-03-31	2020-01-01	2021-03-27	By Total			Montana	All Sexes	All Ages	1545	14228	1271	723	37	2130
2021-03-31	2020-01-01	2021-03-27	By Total			Montana	All Sexes	Under 1 year	0	60		0	0		One or more data cells have counts between 1-9 and have been suppressed in accordance with NCHS confidentiality standards.
2021-03-31	2020-01-01	2021-03-27	By Total			Montana	All Sexes	0-17 years	0	145		0	0		One or more data cells have counts between 1-9 and have been suppressed in accordance with NCHS confidentiality standards.
2021-03-31	2020-01-01	2021-03-27	By Total			Montana	All Sexes	1-4 years	0	15	0	0	0	0
2021-03-31	2020-01-01	2021-03-27	By Total			Montana	All Sexes	5-14 years	0	31	0	0	0	0
2021-03-31	2020-01-01	2021-03-27	By Total			Montana	All Sexes	15-24 years	0	175		0	0		One or more data cells have counts between 1-9 and have been suppressed in accordance with NCHS confidentiality standards.
2021-03-31	2020-01-01	2021-03-27	By Total			Montana	All Sexes	18-29 years		258		0	0		One or more data cells have counts between 1-9 and have been suppressed in accordance with NCHS confidentiality standards.
2021-03-31	2020-01-01	2021-03-27	By Total			Montana	All Sexes	25-34 years		280			0	11	One or more data cells have counts between 1-9 and have been suppressed in accordance with NCHS confidentiality standards.
2021-03-31	2020-01-01	2021-03-27	By Total			Montana	All Sexes	30-39 years	19	344	19	11		29	One or more data cells have counts between 1-9 and have been suppressed in accordance with NCHS confidentiality standards.
2021-03-31	2020-01-01	2021-03-27	By Total			Montana	All Sexes	35-44 years	26	388	26	15		39	One or more data cells have counts between 1-9 and have been suppressed in accordance with NCHS confidentiality standards.
2021-03-31	2020-01-01	2021-03-27	By Total			Montana	All Sexes	40-49 years	32	478	27	16		44	One or more data cells have counts between 1-9 and have been suppressed in accordance with NCHS confidentiality standards.
2021-03-31	2020-01-01	2021-03-27	By Total			Montana	All Sexes	45-54 years	55	699	41	24		73	One or more data cells have counts between 1-9 and have been suppressed in accordance with NCHS confidentiality standards.
2021-03-31	2020-01-01	2021-03-27	By Total			Montana	All Sexes	50-64 years	203	2144	170	109		271	One or more data cells have counts between 1-9 and have been suppressed in accordance with NCHS confidentiality standards.
2021-03-31	2020-01-01	2021-03-27	By Total			Montana	All Sexes	55-64 years	167	1721	143	94		223	One or more data cells have counts between 1-9 and have been suppressed in accordance with NCHS confidentiality standards.
2021-03-31	2020-01-01	2021-03-27	By Total			Montana	All Sexes	65-74 years	335	2915	308	176		475	One or more data cells have counts between 1-9 and have been suppressed in accordance with NCHS confidentiality standards.
2021-03-31	2020-01-01	2021-03-27	By Total			Montana	All Sexes	75-84 years	453	3611	381	231		609	One or more data cells have counts between 1-9 and have been suppressed in accordance with NCHS confidentiality standards.
2021-03-31	2020-01-01	2021-03-27	By Total			Montana	All Sexes	85 years and over	502	4333	363	180	13	698
2021-03-31	2020-01-01	2021-03-27	By Total			Montana	Male	All Ages	863	7826	767	433	19	1216
2021-03-31	2020-01-01	2021-03-27	By Total			Montana	Male	Under 1 year	0	29	0	0	0	0
2021-03-31	2020-01-01	2021-03-27	By Total			Montana	Male	0-17 years	0	78	0	0	0	0
2021-03-31	2020-01-01	2021-03-27	By Total			Montana	Male	1-4 years	0		0	0	0	0	One or more data cells have counts between 1-9 and have been suppressed in accordance with NCHS confidentiality standards.
2021-03-31	2020-01-01	2021-03-27	By Total			Montana	Male	5-14 years	0	17	0	0	0	0
2021-03-31	2020-01-01	2021-03-27	By Total			Montana	Male	15-24 years	0	128	0	0	0	0
2021-03-31	2020-01-01	2021-03-27	By Total			Montana	Male	18-29 years		193	0	0	0		One or more data cells have counts between 1-9 and have been suppressed in accordance with NCHS confidentiality standards.
2021-03-31	2020-01-01	2021-03-27	By Total			Montana	Male	25-34 years		190			0		One or more data cells have counts between 1-9 and have been suppressed in accordance with NCHS confidentiality standards.
2021-03-31	2020-01-01	2021-03-27	By Total			Montana	Male	30-39 years	10	221	14			18	One or more data cells have counts between 1-9 and have been suppressed in accordance with NCHS confidentiality standards.
2021-03-31	2020-01-01	2021-03-27	By Total			Montana	Male	35-44 years	13	255	17			25	One or more data cells have counts between 1-9 and have been suppressed in accordance with NCHS confidentiality standards.
2021-03-31	2020-01-01	2021-03-27	By Total			Montana	Male	40-49 years	18	325	17			28	One or more data cells have counts between 1-9 and have been suppressed in accordance with NCHS confidentiality standards.
2021-03-31	2020-01-01	2021-03-27	By Total			Montana	Male	45-54 years	38	454	29	17		51	One or more data cells have counts between 1-9 and have been suppressed in accordance with NCHS confidentiality standards.
2021-03-31	2020-01-01	2021-03-27	By Total			Montana	Male	50-64 years	124	1326	109	67		170	One or more data cells have counts between 1-9 and have been suppressed in accordance with NCHS confidentiality standards.
2021-03-31	2020-01-01	2021-03-27	By Total			Montana	Male	55-64 years	99	1063	90	57		136	One or more data cells have counts between 1-9 and have been suppressed in accordance with NCHS confidentiality standards.
2021-03-31	2020-01-01	2021-03-27	By Total			Montana	Male	65-74 years	207	1762	183	105		287	One or more data cells have counts between 1-9 and have been suppressed in accordance with NCHS confidentiality standards.
2021-03-31	2020-01-01	2021-03-27	By Total			Montana	Male	75-84 years	276	2050	242	149		374	One or more data cells have counts between 1-9 and have been suppressed in accordance with NCHS confidentiality standards.
2021-03-31	2020-01-01	2021-03-27	By Total			Montana	Male	85 years and over	227	1871	202	96		338	One or more data cells have counts between 1-9 and have been suppressed in accordance with NCHS confidentiality standards.
2021-03-31	2020-01-01	2021-03-27	By Total			Montana	Female	All Ages	682	6402	504	290	18	914
2021-03-31	2020-01-01	2021-03-27	By Total			Montana	Female	Under 1 year	0	31		0	0		One or more data cells have counts between 1-9 and have been suppressed in accordance with NCHS confidentiality standards.
2021-03-31	2020-01-01	2021-03-27	By Total			Montana	Female	0-17 years	0	67		0	0		One or more data cells have counts between 1-9 and have been suppressed in accordance with NCHS confidentiality standards.
2021-03-31	2020-01-01	2021-03-27	By Total			Montana	Female	1-4 years	0		0	0	0	0	One or more data cells have counts between 1-9 and have been suppressed in accordance with NCHS confidentiality standards.
2021-03-31	2020-01-01	2021-03-27	By Total			Montana	Female	5-14 years	0	14	0	0	0	0
2021-03-31	2020-01-01	2021-03-27	By Total			Montana	Female	15-24 years	0	47		0	0		One or more data cells have counts between 1-9 and have been suppressed in accordance with NCHS confidentiality standards.
2021-03-31	2020-01-01	2021-03-27	By Total			Montana	Female	18-29 years	0	65		0	0		One or more data cells have counts between 1-9 and have been suppressed in accordance with NCHS confidentiality standards.
2021-03-31	2020-01-01	2021-03-27	By Total			Montana	Female	25-34 years		90			0		One or more data cells have counts between 1-9 and have been suppressed in accordance with NCHS confidentiality standards.
2021-03-31	2020-01-01	2021-03-27	By Total			Montana	Female	30-39 years		123			0	11	One or more data cells have counts between 1-9 and have been suppressed in accordance with NCHS confidentiality standards.
2021-03-31	2020-01-01	2021-03-27	By Total			Montana	Female	35-44 years	13	133			0	14	One or more data cells have counts between 1-9 and have been suppressed in accordance with NCHS confidentiality standards.
2021-03-31	2020-01-01	2021-03-27	By Total			Montana	Female	40-49 years	14	153	10		0	16	One or more data cells have counts between 1-9 and have been suppressed in accordance with NCHS confidentiality standards.
2021-03-31	2020-01-01	2021-03-27	By Total			Montana	Female	45-54 years	17	245	12		0	22	One or more data cells have counts between 1-9 and have been suppressed in accordance with NCHS confidentiality standards.
2021-03-31	2020-01-01	2021-03-27	By Total			Montana	Female	50-64 years	79	818	61	42		101	One or more data cells have counts between 1-9 and have been suppressed in accordance with NCHS confidentiality standards.
2021-03-31	2020-01-01	2021-03-27	By Total			Montana	Female	55-64 years	68	658	53	37		87	One or more data cells have counts between 1-9 and have been suppressed in accordance with NCHS confidentiality standards.
2021-03-31	2020-01-01	2021-03-27	By Total			Montana	Female	65-74 years	128	1153	125	71		188	One or more data cells have counts between 1-9 and have been suppressed in accordance with NCHS confidentiality standards.
2021-03-31	2020-01-01	2021-03-27	By Total			Montana	Female	75-84 years	177	1561	139	82		235	One or more data cells have counts between 1-9 and have been suppressed in accordance with NCHS confidentiality standards.
2021-03-31	2020-01-01	2021-03-27	By Total			Montana	Female	85 years and over	275	2462	161	84		360	One or more data cells have counts between 1-9 and have been suppressed in accordance with NCHS confidentiality standards.
2021-03-31	2020-01-01	2021-03-27	By Total			Nebraska	All Sexes	All Ages	2746	23442	2367	1136	54	4030
2021-03-31	2020-01-01	2021-03-27	By Total			Nebraska	All Sexes	Under 1 year	0	168		0			One or more data cells have counts between 1-9 and have been suppressed in accordance with NCHS confidentiality standards.
2021-03-31	2020-01-01	2021-03-27	By Total			Nebraska	All Sexes	0-17 years		301		0		10	One or more data cells have counts between 1-9 and have been suppressed in accordance with NCHS confidentiality standards.
2021-03-31	2020-01-01	2021-03-27	By Total			Nebraska	All Sexes	1-4 years	0	29	0	0			One or more data cells have counts between 1-9 and have been suppressed in accordance with NCHS confidentiality standards.
2021-03-31	2020-01-01	2021-03-27	By Total			Nebraska	All Sexes	5-14 years		56		0			One or more data cells have counts between 1-9 and have been suppressed in accordance with NCHS confidentiality standards.
2021-03-31	2020-01-01	2021-03-27	By Total			Nebraska	All Sexes	15-24 years		234		0		13	One or more data cells have counts between 1-9 and have been suppressed in accordance with NCHS confidentiality standards.
2021-03-31	2020-01-01	2021-03-27	By Total			Nebraska	All Sexes	18-29 years	12	334	16			24	One or more data cells have counts between 1-9 and have been suppressed in accordance with NCHS confidentiality standards.
2021-03-31	2020-01-01	2021-03-27	By Total			Nebraska	All Sexes	25-34 years	17	349	21			32	One or more data cells have counts between 1-9 and have been suppressed in accordance with NCHS confidentiality standards.
2021-03-31	2020-01-01	2021-03-27	By Total			Nebraska	All Sexes	30-39 years	24	483	23			41	One or more data cells have counts between 1-9 and have been suppressed in accordance with NCHS confidentiality standards.
2021-03-31	2020-01-01	2021-03-27	By Total			Nebraska	All Sexes	35-44 years	26	554	22	10	0	38
2021-03-31	2020-01-01	2021-03-27	By Total			Nebraska	All Sexes	40-49 years	45	709	37	16		67	One or more data cells have counts between 1-9 and have been suppressed in accordance with NCHS confidentiality standards.
2021-03-31	2020-01-01	2021-03-27	By Total			Nebraska	All Sexes	45-54 years	102	1079	95	46		153	One or more data cells have counts between 1-9 and have been suppressed in accordance with NCHS confidentiality standards.
2021-03-31	2020-01-01	2021-03-27	By Total			Nebraska	All Sexes	50-64 years	334	3319	316	154	14	510
2021-03-31	2020-01-01	2021-03-27	By Total			Nebraska	All Sexes	55-64 years	266	2677	248	119	13	408
2021-03-31	2020-01-01	2021-03-27	By Total			Nebraska	All Sexes	65-74 years	528	4475	447	224	11	761
2021-03-31	2020-01-01	2021-03-27	By Total			Nebraska	All Sexes	75-84 years	791	5726	674	366		1105	One or more data cells have counts between 1-9 and have been suppressed in accordance with NCHS confidentiality standards.
2021-03-31	2020-01-01	2021-03-27	By Total			Nebraska	All Sexes	85 years and over	1011	8095	850	364	15	1512
2021-03-31	2020-01-01	2021-03-27	By Total			Nebraska	Male	All Ages	1557	12098	1322	696	23	2205
2021-03-31	2020-01-01	2021-03-27	By Total			Nebraska	Male	Under 1 year	0	105	0	0			One or more data cells have counts between 1-9 and have been suppressed in accordance with NCHS confidentiality standards.
2021-03-31	2020-01-01	2021-03-27	By Total			Nebraska	Male	0-17 years		190		0			One or more data cells have counts between 1-9 and have been suppressed in accordance with NCHS confidentiality standards.
2021-03-31	2020-01-01	2021-03-27	By Total			Nebraska	Male	1-4 years	0	14	0	0	0	0
2021-03-31	2020-01-01	2021-03-27	By Total			Nebraska	Male	5-14 years		36	0	0			One or more data cells have counts between 1-9 and have been suppressed in accordance with NCHS confidentiality standards.
2021-03-31	2020-01-01	2021-03-27	By Total			Nebraska	Male	15-24 years		170		0	0		One or more data cells have counts between 1-9 and have been suppressed in accordance with NCHS confidentiality standards.
2021-03-31	2020-01-01	2021-03-27	By Total			Nebraska	Male	18-29 years		247	10		0	14	One or more data cells have counts between 1-9 and have been suppressed in accordance with NCHS confidentiality standards.
2021-03-31	2020-01-01	2021-03-27	By Total			Nebraska	Male	25-34 years	13	254	13			22	One or more data cells have counts between 1-9 and have been suppressed in accordance with NCHS confidentiality standards.
2021-03-31	2020-01-01	2021-03-27	By Total			Nebraska	Male	30-39 years	18	329	16			29	One or more data cells have counts between 1-9 and have been suppressed in accordance with NCHS confidentiality standards.
2021-03-31	2020-01-01	2021-03-27	By Total			Nebraska	Male	35-44 years	16	368	13		0	23	One or more data cells have counts between 1-9 and have been suppressed in accordance with NCHS confidentiality standards.
2021-03-31	2020-01-01	2021-03-27	By Total			Nebraska	Male	40-49 years	25	440	16			33	One or more data cells have counts between 1-9 and have been suppressed in accordance with NCHS confidentiality standards.
2021-03-31	2020-01-01	2021-03-27	By Total			Nebraska	Male	45-54 years	68	669	53	29		93	One or more data cells have counts between 1-9 and have been suppressed in accordance with NCHS confidentiality standards.
2021-03-31	2020-01-01	2021-03-27	By Total			Nebraska	Male	50-64 years	218	2037	200	100		326	One or more data cells have counts between 1-9 and have been suppressed in accordance with NCHS confidentiality standards.
2021-03-31	2020-01-01	2021-03-27	By Total			Nebraska	Male	55-64 years	170	1627	159	78		259	One or more data cells have counts between 1-9 and have been suppressed in accordance with NCHS confidentiality standards.
2021-03-31	2020-01-01	2021-03-27	By Total			Nebraska	Male	65-74 years	352	2626	278	150		485	One or more data cells have counts between 1-9 and have been suppressed in accordance with NCHS confidentiality standards.
2021-03-31	2020-01-01	2021-03-27	By Total			Nebraska	Male	75-84 years	481	3043	386	235		634	One or more data cells have counts between 1-9 and have been suppressed in accordance with NCHS confidentiality standards.
2021-03-31	2020-01-01	2021-03-27	By Total			Nebraska	Male	85 years and over	455	3186	414	193		679	One or more data cells have counts between 1-9 and have been suppressed in accordance with NCHS confidentiality standards.
2021-03-31	2020-01-01	2021-03-27	By Total			Nebraska	Female	All Ages	1189	11344	1045	440	31	1825
2021-03-31	2020-01-01	2021-03-27	By Total			Nebraska	Female	Under 1 year	0	63		0	0		One or more data cells have counts between 1-9 and have been suppressed in accordance with NCHS confidentiality standards.
2021-03-31	2020-01-01	2021-03-27	By Total			Nebraska	Female	0-17 years	0	111		0			One or more data cells have counts between 1-9 and have been suppressed in accordance with NCHS confidentiality standards.
2021-03-31	2020-01-01	2021-03-27	By Total			Nebraska	Female	1-4 years	0	15	0	0			One or more data cells have counts between 1-9 and have been suppressed in accordance with NCHS confidentiality standards.
2021-03-31	2020-01-01	2021-03-27	By Total			Nebraska	Female	5-14 years	0	20		0			One or more data cells have counts between 1-9 and have been suppressed in accordance with NCHS confidentiality standards.
2021-03-31	2020-01-01	2021-03-27	By Total			Nebraska	Female	15-24 years		64		0			One or more data cells have counts between 1-9 and have been suppressed in accordance with NCHS confidentiality standards.
2021-03-31	2020-01-01	2021-03-27	By Total			Nebraska	Female	18-29 years		87				10	One or more data cells have counts between 1-9 and have been suppressed in accordance with NCHS confidentiality standards.
2021-03-31	2020-01-01	2021-03-27	By Total			Nebraska	Female	25-34 years		95			0	10	One or more data cells have counts between 1-9 and have been suppressed in accordance with NCHS confidentiality standards.
2021-03-31	2020-01-01	2021-03-27	By Total			Nebraska	Female	30-39 years		154			0	12	One or more data cells have counts between 1-9 and have been suppressed in accordance with NCHS confidentiality standards.
2021-03-31	2020-01-01	2021-03-27	By Total			Nebraska	Female	35-44 years	10	186			0	15	One or more data cells have counts between 1-9 and have been suppressed in accordance with NCHS confidentiality standards.
2021-03-31	2020-01-01	2021-03-27	By Total			Nebraska	Female	40-49 years	20	269	21		0	34	One or more data cells have counts between 1-9 and have been suppressed in accordance with NCHS confidentiality standards.
2021-03-31	2020-01-01	2021-03-27	By Total			Nebraska	Female	45-54 years	34	410	42	17		60	One or more data cells have counts between 1-9 and have been suppressed in accordance with NCHS confidentiality standards.
2021-03-31	2020-01-01	2021-03-27	By Total			Nebraska	Female	50-64 years	116	1282	116	54		184	One or more data cells have counts between 1-9 and have been suppressed in accordance with NCHS confidentiality standards.
2021-03-31	2020-01-01	2021-03-27	By Total			Nebraska	Female	55-64 years	96	1050	89	41		149	One or more data cells have counts between 1-9 and have been suppressed in accordance with NCHS confidentiality standards.
2021-03-31	2020-01-01	2021-03-27	By Total			Nebraska	Female	65-74 years	176	1849	169	74		276	One or more data cells have counts between 1-9 and have been suppressed in accordance with NCHS confidentiality standards.
2021-03-31	2020-01-01	2021-03-27	By Total			Nebraska	Female	75-84 years	310	2683	288	131		471	One or more data cells have counts between 1-9 and have been suppressed in accordance with NCHS confidentiality standards.
2021-03-31	2020-01-01	2021-03-27	By Total			Nebraska	Female	85 years and over	556	4909	436	171	12	833
2021-03-31	2020-01-01	2021-03-27	By Total			Nevada	All Sexes	All Ages	5322	38830	6074	4156	62	7300
2021-03-31	2020-01-01	2021-03-27	By Total			Nevada	All Sexes	Under 1 year		184		0	0		One or more data cells have counts between 1-9 and have been suppressed in accordance with NCHS confidentiality standards.
2021-03-31	2020-01-01	2021-03-27	By Total			Nevada	All Sexes	0-17 years		361		0	0		One or more data cells have counts between 1-9 and have been suppressed in accordance with NCHS confidentiality standards.
2021-03-31	2020-01-01	2021-03-27	By Total			Nevada	All Sexes	1-4 years	0	37		0	0		One or more data cells have counts between 1-9 and have been suppressed in accordance with NCHS confidentiality standards.
2021-03-31	2020-01-01	2021-03-27	By Total			Nevada	All Sexes	5-14 years		64		0	0		One or more data cells have counts between 1-9 and have been suppressed in accordance with NCHS confidentiality standards.
2021-03-31	2020-01-01	2021-03-27	By Total			Nevada	All Sexes	15-24 years	11	461			0	17	One or more data cells have counts between 1-9 and have been suppressed in accordance with NCHS confidentiality standards.
2021-03-31	2020-01-01	2021-03-27	By Total			Nevada	All Sexes	18-29 years	32	775	32	18	0	46
2021-03-31	2020-01-01	2021-03-27	By Total			Nevada	All Sexes	25-34 years	48	891	60	34		76	One or more data cells have counts between 1-9 and have been suppressed in accordance with NCHS confidentiality standards.
2021-03-31	2020-01-01	2021-03-27	By Total			Nevada	All Sexes	30-39 years	73	1086	88	52		113	One or more data cells have counts between 1-9 and have been suppressed in accordance with NCHS confidentiality standards.
2021-03-31	2020-01-01	2021-03-27	By Total			Nevada	All Sexes	35-44 years	127	1334	132	88		174	One or more data cells have counts between 1-9 and have been suppressed in accordance with NCHS confidentiality standards.
2021-03-31	2020-01-01	2021-03-27	By Total			Nevada	All Sexes	40-49 years	232	1818	243	174		304	One or more data cells have counts between 1-9 and have been suppressed in accordance with NCHS confidentiality standards.
2021-03-31	2020-01-01	2021-03-27	By Total			Nevada	All Sexes	45-54 years	372	2587	421	293		507	One or more data cells have counts between 1-9 and have been suppressed in accordance with NCHS confidentiality standards.
2021-03-31	2020-01-01	2021-03-27	By Total			Nevada	All Sexes	50-64 years	1002	6982	1154	782	19	1393
2021-03-31	2020-01-01	2021-03-27	By Total			Nevada	All Sexes	55-64 years	783	5464	896	608	14	1085
2021-03-31	2020-01-01	2021-03-27	By Total			Nevada	All Sexes	65-74 years	1378	8954	1648	1105	17	1937
2021-03-31	2020-01-01	2021-03-27	By Total			Nevada	All Sexes	75-84 years	1573	10206	1777	1237	14	2126
2021-03-31	2020-01-01	2021-03-27	By Total			Nevada	All Sexes	85 years and over	1028	8648	1127	788		1372	One or more data cells have counts between 1-9 and have been suppressed in accordance with NCHS confidentiality standards.
2021-03-31	2020-01-01	2021-03-27	By Total			Nevada	Male	All Ages	3332	21955	3702	2626	36	4443
2021-03-31	2020-01-01	2021-03-27	By Total			Nevada	Male	Under 1 year	0	104		0	0		One or more data cells have counts between 1-9 and have been suppressed in accordance with NCHS confidentiality standards.
2021-03-31	2020-01-01	2021-03-27	By Total			Nevada	Male	0-17 years		223		0	0		One or more data cells have counts between 1-9 and have been suppressed in accordance with NCHS confidentiality standards.
2021-03-31	2020-01-01	2021-03-27	By Total			Nevada	Male	1-4 years	0	23		0	0		One or more data cells have counts between 1-9 and have been suppressed in accordance with NCHS confidentiality standards.
2021-03-31	2020-01-01	2021-03-27	By Total			Nevada	Male	5-14 years		44		0	0		One or more data cells have counts between 1-9 and have been suppressed in accordance with NCHS confidentiality standards.
2021-03-31	2020-01-01	2021-03-27	By Total			Nevada	Male	15-24 years		338			0	12	One or more data cells have counts between 1-9 and have been suppressed in accordance with NCHS confidentiality standards.
2021-03-31	2020-01-01	2021-03-27	By Total			Nevada	Male	18-29 years	16	557	21	11	0	26
2021-03-31	2020-01-01	2021-03-27	By Total			Nevada	Male	25-34 years	25	623	36	20	0	41
2021-03-31	2020-01-01	2021-03-27	By Total			Nevada	Male	30-39 years	51	727	57	38		71	One or more data cells have counts between 1-9 and have been suppressed in accordance with NCHS confidentiality standards.
2021-03-31	2020-01-01	2021-03-27	By Total			Nevada	Male	35-44 years	94	873	91	67		119	One or more data cells have counts between 1-9 and have been suppressed in accordance with NCHS confidentiality standards.
2021-03-31	2020-01-01	2021-03-27	By Total			Nevada	Male	40-49 years	165	1172	161	125	0	201
2021-03-31	2020-01-01	2021-03-27	By Total			Nevada	Male	45-54 years	269	1668	279	213		337	One or more data cells have counts between 1-9 and have been suppressed in accordance with NCHS confidentiality standards.
2021-03-31	2020-01-01	2021-03-27	By Total			Nevada	Male	50-64 years	685	4420	744	534	12	907
2021-03-31	2020-01-01	2021-03-27	By Total			Nevada	Male	55-64 years	522	3426	571	405	10	698
2021-03-31	2020-01-01	2021-03-27	By Total			Nevada	Male	65-74 years	903	5399	1038	716	12	1236
2021-03-31	2020-01-01	2021-03-27	By Total			Nevada	Male	75-84 years	963	5638	1065	764		1273	One or more data cells have counts between 1-9 and have been suppressed in accordance with NCHS confidentiality standards.
2021-03-31	2020-01-01	2021-03-27	By Total			Nevada	Male	85 years and over	547	3819	611	438		722	One or more data cells have counts between 1-9 and have been suppressed in accordance with NCHS confidentiality standards.
2021-03-31	2020-01-01	2021-03-27	By Total			Nevada	Female	All Ages	1990	16875	2372	1530	26	2857
2021-03-31	2020-01-01	2021-03-27	By Total			Nevada	Female	Under 1 year		80	0	0	0		One or more data cells have counts between 1-9 and have been suppressed in accordance with NCHS confidentiality standards.
2021-03-31	2020-01-01	2021-03-27	By Total			Nevada	Female	0-17 years		138	0	0	0		One or more data cells have counts between 1-9 and have been suppressed in accordance with NCHS confidentiality standards.
2021-03-31	2020-01-01	2021-03-27	By Total			Nevada	Female	1-4 years	0	14	0	0	0	0
2021-03-31	2020-01-01	2021-03-27	By Total			Nevada	Female	5-14 years	0	20	0	0	0	0
2021-03-31	2020-01-01	2021-03-27	By Total			Nevada	Female	15-24 years		123		0	0		One or more data cells have counts between 1-9 and have been suppressed in accordance with NCHS confidentiality standards.
2021-03-31	2020-01-01	2021-03-27	By Total			Nevada	Female	18-29 years	16	218	11		0	20	One or more data cells have counts between 1-9 and have been suppressed in accordance with NCHS confidentiality standards.
2021-03-31	2020-01-01	2021-03-27	By Total			Nevada	Female	25-34 years	23	268	24	14		35	One or more data cells have counts between 1-9 and have been suppressed in accordance with NCHS confidentiality standards.
2021-03-31	2020-01-01	2021-03-27	By Total			Nevada	Female	30-39 years	22	359	31	14		42	One or more data cells have counts between 1-9 and have been suppressed in accordance with NCHS confidentiality standards.
2021-03-31	2020-01-01	2021-03-27	By Total			Nevada	Female	35-44 years	33	461	41	21		55	One or more data cells have counts between 1-9 and have been suppressed in accordance with NCHS confidentiality standards.
2021-03-31	2020-01-01	2021-03-27	By Total			Nevada	Female	40-49 years	67	646	82	49		103	One or more data cells have counts between 1-9 and have been suppressed in accordance with NCHS confidentiality standards.
2021-03-31	2020-01-01	2021-03-27	By Total			Nevada	Female	45-54 years	103	919	142	80		170	One or more data cells have counts between 1-9 and have been suppressed in accordance with NCHS confidentiality standards.
2021-03-31	2020-01-01	2021-03-27	By Total			Nevada	Female	50-64 years	317	2562	410	248		486	One or more data cells have counts between 1-9 and have been suppressed in accordance with NCHS confidentiality standards.
2021-03-31	2020-01-01	2021-03-27	By Total			Nevada	Female	55-64 years	261	2038	325	203		387	One or more data cells have counts between 1-9 and have been suppressed in accordance with NCHS confidentiality standards.
2021-03-31	2020-01-01	2021-03-27	By Total			Nevada	Female	65-74 years	475	3555	610	389		701	One or more data cells have counts between 1-9 and have been suppressed in accordance with NCHS confidentiality standards.
2021-03-31	2020-01-01	2021-03-27	By Total			Nevada	Female	75-84 years	610	4568	712	473		853	One or more data cells have counts between 1-9 and have been suppressed in accordance with NCHS confidentiality standards.
2021-03-31	2020-01-01	2021-03-27	By Total			Nevada	Female	85 years and over	481	4829	516	350		650	One or more data cells have counts between 1-9 and have been suppressed in accordance with NCHS confidentiality standards.
2021-03-31	2020-01-01	2021-03-27	By Total			New Hampshire	All Sexes	All Ages	1245	16633	1080	353	37	2006
2021-03-31	2020-01-01	2021-03-27	By Total			New Hampshire	All Sexes	Under 1 year	0	57	0	0			One or more data cells have counts between 1-9 and have been suppressed in accordance with NCHS confidentiality standards.
2021-03-31	2020-01-01	2021-03-27	By Total			New Hampshire	All Sexes	0-17 years	0	101		0			One or more data cells have counts between 1-9 and have been suppressed in accordance with NCHS confidentiality standards.
2021-03-31	2020-01-01	2021-03-27	By Total			New Hampshire	All Sexes	1-4 years	0	11	0	0	0	0
2021-03-31	2020-01-01	2021-03-27	By Total			New Hampshire	All Sexes	5-14 years	0	18		0	0		One or more data cells have counts between 1-9 and have been suppressed in accordance with NCHS confidentiality standards.
2021-03-31	2020-01-01	2021-03-27	By Total			New Hampshire	All Sexes	15-24 years		116		0	0		One or more data cells have counts between 1-9 and have been suppressed in accordance with NCHS confidentiality standards.
2021-03-31	2020-01-01	2021-03-27	By Total			New Hampshire	All Sexes	18-29 years		230	0	0	0		One or more data cells have counts between 1-9 and have been suppressed in accordance with NCHS confidentiality standards.
2021-03-31	2020-01-01	2021-03-27	By Total			New Hampshire	All Sexes	25-34 years		300					One or more data cells have counts between 1-9 and have been suppressed in accordance with NCHS confidentiality standards.
2021-03-31	2020-01-01	2021-03-27	By Total			New Hampshire	All Sexes	30-39 years		370					One or more data cells have counts between 1-9 and have been suppressed in accordance with NCHS confidentiality standards.
2021-03-31	2020-01-01	2021-03-27	By Total			New Hampshire	All Sexes	35-44 years		382	11		0	12	One or more data cells have counts between 1-9 and have been suppressed in accordance with NCHS confidentiality standards.
2021-03-31	2020-01-01	2021-03-27	By Total			New Hampshire	All Sexes	40-49 years		493	15		0	19	One or more data cells have counts between 1-9 and have been suppressed in accordance with NCHS confidentiality standards.
2021-03-31	2020-01-01	2021-03-27	By Total			New Hampshire	All Sexes	45-54 years	18	755	23			36	One or more data cells have counts between 1-9 and have been suppressed in accordance with NCHS confidentiality standards.
2021-03-31	2020-01-01	2021-03-27	By Total			New Hampshire	All Sexes	50-64 years	65	2304	106	21		154	One or more data cells have counts between 1-9 and have been suppressed in accordance with NCHS confidentiality standards.
2021-03-31	2020-01-01	2021-03-27	By Total			New Hampshire	All Sexes	55-64 years	53	1859	91	18		129	One or more data cells have counts between 1-9 and have been suppressed in accordance with NCHS confidentiality standards.
2021-03-31	2020-01-01	2021-03-27	By Total			New Hampshire	All Sexes	65-74 years	198	3186	232	79	11	362
2021-03-31	2020-01-01	2021-03-27	By Total			New Hampshire	All Sexes	75-84 years	375	4129	336	117		602	One or more data cells have counts between 1-9 and have been suppressed in accordance with NCHS confidentiality standards.
2021-03-31	2020-01-01	2021-03-27	By Total			New Hampshire	All Sexes	85 years and over	595	5820	384	131	10	857
2021-03-31	2020-01-01	2021-03-27	By Total			New Hampshire	Male	All Ages	628	8578	602	210	16	1033
2021-03-31	2020-01-01	2021-03-27	By Total			New Hampshire	Male	Under 1 year	0	31	0	0	0	0
2021-03-31	2020-01-01	2021-03-27	By Total			New Hampshire	Male	0-17 years	0	64		0	0		One or more data cells have counts between 1-9 and have been suppressed in accordance with NCHS confidentiality standards.
2021-03-31	2020-01-01	2021-03-27	By Total			New Hampshire	Male	1-4 years	0		0	0	0	0	One or more data cells have counts between 1-9 and have been suppressed in accordance with NCHS confidentiality standards.
2021-03-31	2020-01-01	2021-03-27	By Total			New Hampshire	Male	5-14 years	0	11		0	0		One or more data cells have counts between 1-9 and have been suppressed in accordance with NCHS confidentiality standards.
2021-03-31	2020-01-01	2021-03-27	By Total			New Hampshire	Male	15-24 years		84		0	0		One or more data cells have counts between 1-9 and have been suppressed in accordance with NCHS confidentiality standards.
2021-03-31	2020-01-01	2021-03-27	By Total			New Hampshire	Male	18-29 years		157	0	0	0		One or more data cells have counts between 1-9 and have been suppressed in accordance with NCHS confidentiality standards.
2021-03-31	2020-01-01	2021-03-27	By Total			New Hampshire	Male	25-34 years		204					One or more data cells have counts between 1-9 and have been suppressed in accordance with NCHS confidentiality standards.
2021-03-31	2020-01-01	2021-03-27	By Total			New Hampshire	Male	30-39 years		257					One or more data cells have counts between 1-9 and have been suppressed in accordance with NCHS confidentiality standards.
2021-03-31	2020-01-01	2021-03-27	By Total			New Hampshire	Male	35-44 years		259			0	10	One or more data cells have counts between 1-9 and have been suppressed in accordance with NCHS confidentiality standards.
2021-03-31	2020-01-01	2021-03-27	By Total			New Hampshire	Male	40-49 years		317	10		0	14	One or more data cells have counts between 1-9 and have been suppressed in accordance with NCHS confidentiality standards.
2021-03-31	2020-01-01	2021-03-27	By Total			New Hampshire	Male	45-54 years	14	486	15			26	One or more data cells have counts between 1-9 and have been suppressed in accordance with NCHS confidentiality standards.
2021-03-31	2020-01-01	2021-03-27	By Total			New Hampshire	Male	50-64 years	51	1468	79	18		113	One or more data cells have counts between 1-9 and have been suppressed in accordance with NCHS confidentiality standards.
2021-03-31	2020-01-01	2021-03-27	By Total			New Hampshire	Male	55-64 years	42	1181	68	16	0	94
2021-03-31	2020-01-01	2021-03-27	By Total			New Hampshire	Male	65-74 years	122	1901	139	52		212	One or more data cells have counts between 1-9 and have been suppressed in accordance with NCHS confidentiality standards.
2021-03-31	2020-01-01	2021-03-27	By Total			New Hampshire	Male	75-84 years	215	2151	195	74		342	One or more data cells have counts between 1-9 and have been suppressed in accordance with NCHS confidentiality standards.
2021-03-31	2020-01-01	2021-03-27	By Total			New Hampshire	Male	85 years and over	229	2263	173	62		342	One or more data cells have counts between 1-9 and have been suppressed in accordance with NCHS confidentiality standards.
2021-03-31	2020-01-01	2021-03-27	By Total			New Hampshire	Female	All Ages	617	8055	478	143	21	973
2021-03-31	2020-01-01	2021-03-27	By Total			New Hampshire	Female	Under 1 year	0	26	0	0			One or more data cells have counts between 1-9 and have been suppressed in accordance with NCHS confidentiality standards.
2021-03-31	2020-01-01	2021-03-27	By Total			New Hampshire	Female	0-17 years	0	37	0	0			One or more data cells have counts between 1-9 and have been suppressed in accordance with NCHS confidentiality standards.
2021-03-31	2020-01-01	2021-03-27	By Total			New Hampshire	Female	1-4 years	0		0	0	0	0	One or more data cells have counts between 1-9 and have been suppressed in accordance with NCHS confidentiality standards.
2021-03-31	2020-01-01	2021-03-27	By Total			New Hampshire	Female	5-14 years	0		0	0	0	0	One or more data cells have counts between 1-9 and have been suppressed in accordance with NCHS confidentiality standards.
2021-03-31	2020-01-01	2021-03-27	By Total			New Hampshire	Female	15-24 years	0	32	0	0	0	0
2021-03-31	2020-01-01	2021-03-27	By Total			New Hampshire	Female	18-29 years	0	73	0	0	0	0
2021-03-31	2020-01-01	2021-03-27	By Total			New Hampshire	Female	25-34 years	0	96	0	0	0	0
2021-03-31	2020-01-01	2021-03-27	By Total			New Hampshire	Female	30-39 years	0	113		0	0		One or more data cells have counts between 1-9 and have been suppressed in accordance with NCHS confidentiality standards.
2021-03-31	2020-01-01	2021-03-27	By Total			New Hampshire	Female	35-44 years	0	123		0	0		One or more data cells have counts between 1-9 and have been suppressed in accordance with NCHS confidentiality standards.
2021-03-31	2020-01-01	2021-03-27	By Total			New Hampshire	Female	40-49 years		176			0		One or more data cells have counts between 1-9 and have been suppressed in accordance with NCHS confidentiality standards.
2021-03-31	2020-01-01	2021-03-27	By Total			New Hampshire	Female	45-54 years		269			0	10	One or more data cells have counts between 1-9 and have been suppressed in accordance with NCHS confidentiality standards.
2021-03-31	2020-01-01	2021-03-27	By Total			New Hampshire	Female	50-64 years	14	836	27			41	One or more data cells have counts between 1-9 and have been suppressed in accordance with NCHS confidentiality standards.
2021-03-31	2020-01-01	2021-03-27	By Total			New Hampshire	Female	55-64 years	11	678	23			35	One or more data cells have counts between 1-9 and have been suppressed in accordance with NCHS confidentiality standards.
2021-03-31	2020-01-01	2021-03-27	By Total			New Hampshire	Female	65-74 years	76	1285	93	27		150	One or more data cells have counts between 1-9 and have been suppressed in accordance with NCHS confidentiality standards.
2021-03-31	2020-01-01	2021-03-27	By Total			New Hampshire	Female	75-84 years	160	1978	141	43		260	One or more data cells have counts between 1-9 and have been suppressed in accordance with NCHS confidentiality standards.
2021-03-31	2020-01-01	2021-03-27	By Total			New Hampshire	Female	85 years and over	366	3557	211	69		515	One or more data cells have counts between 1-9 and have been suppressed in accordance with NCHS confidentiality standards.
2021-03-31	2020-01-01	2021-03-27	By Total			New Jersey	All Sexes	All Ages	22478	116378	16405	11155	155	27868
2021-03-31	2020-01-01	2021-03-27	By Total			New Jersey	All Sexes	Under 1 year		382					One or more data cells have counts between 1-9 and have been suppressed in accordance with NCHS confidentiality standards.
2021-03-31	2020-01-01	2021-03-27	By Total			New Jersey	All Sexes	0-17 years		622				10	One or more data cells have counts between 1-9 and have been suppressed in accordance with NCHS confidentiality standards.
2021-03-31	2020-01-01	2021-03-27	By Total			New Jersey	All Sexes	1-4 years		72	0	0	0		One or more data cells have counts between 1-9 and have been suppressed in accordance with NCHS confidentiality standards.
2021-03-31	2020-01-01	2021-03-27	By Total			New Jersey	All Sexes	5-14 years		81		0	0		One or more data cells have counts between 1-9 and have been suppressed in accordance with NCHS confidentiality standards.
2021-03-31	2020-01-01	2021-03-27	By Total			New Jersey	All Sexes	15-24 years	22	686	22		0	39	One or more data cells have counts between 1-9 and have been suppressed in accordance with NCHS confidentiality standards.
2021-03-31	2020-01-01	2021-03-27	By Total			New Jersey	All Sexes	18-29 years	84	1478	66	33	0	117
2021-03-31	2020-01-01	2021-03-27	By Total			New Jersey	All Sexes	25-34 years	157	1985	111	73		201	One or more data cells have counts between 1-9 and have been suppressed in accordance with NCHS confidentiality standards.
2021-03-31	2020-01-01	2021-03-27	By Total			New Jersey	All Sexes	30-39 years	249	2530	163	112		307	One or more data cells have counts between 1-9 and have been suppressed in accordance with NCHS confidentiality standards.
2021-03-31	2020-01-01	2021-03-27	By Total			New Jersey	All Sexes	35-44 years	391	3064	261	183		472	One or more data cells have counts between 1-9 and have been suppressed in accordance with NCHS confidentiality standards.
2021-03-31	2020-01-01	2021-03-27	By Total			New Jersey	All Sexes	40-49 years	665	4051	458	330	10	803
2021-03-31	2020-01-01	2021-03-27	By Total			New Jersey	All Sexes	45-54 years	1156	6185	804	586	14	1388
2021-03-31	2020-01-01	2021-03-27	By Total			New Jersey	All Sexes	50-64 years	3603	17831	2537	1850	25	4312
2021-03-31	2020-01-01	2021-03-27	By Total			New Jersey	All Sexes	55-64 years	2875	14057	2026	1478	19	3439
2021-03-31	2020-01-01	2021-03-27	By Total			New Jersey	All Sexes	65-74 years	4582	21259	3358	2391	24	5569
2021-03-31	2020-01-01	2021-03-27	By Total			New Jersey	All Sexes	75-84 years	5990	28257	4555	3117	33	7457
2021-03-31	2020-01-01	2021-03-27	By Total			New Jersey	All Sexes	85 years and over	7301	40350	5262	3321	54	9293
2021-03-31	2020-01-01	2021-03-27	By Total			New Jersey	Male	All Ages	12297	59310	9116	6297	92	15201
2021-03-31	2020-01-01	2021-03-27	By Total			New Jersey	Male	Under 1 year		200		0	0		One or more data cells have counts between 1-9 and have been suppressed in accordance with NCHS confidentiality standards.
2021-03-31	2020-01-01	2021-03-27	By Total			New Jersey	Male	0-17 years		345		0	0		One or more data cells have counts between 1-9 and have been suppressed in accordance with NCHS confidentiality standards.
2021-03-31	2020-01-01	2021-03-27	By Total			New Jersey	Male	1-4 years	0	43	0	0	0	0
2021-03-31	2020-01-01	2021-03-27	By Total			New Jersey	Male	5-14 years	0	42	0	0	0	0
2021-03-31	2020-01-01	2021-03-27	By Total			New Jersey	Male	15-24 years	15	495	14		0	26	One or more data cells have counts between 1-9 and have been suppressed in accordance with NCHS confidentiality standards.
2021-03-31	2020-01-01	2021-03-27	By Total			New Jersey	Male	18-29 years	54	1081	39	19	0	74
2021-03-31	2020-01-01	2021-03-27	By Total			New Jersey	Male	25-34 years	107	1448	69	51		128	One or more data cells have counts between 1-9 and have been suppressed in accordance with NCHS confidentiality standards.
2021-03-31	2020-01-01	2021-03-27	By Total			New Jersey	Male	30-39 years	185	1783	117	88		218	One or more data cells have counts between 1-9 and have been suppressed in accordance with NCHS confidentiality standards.
2021-03-31	2020-01-01	2021-03-27	By Total			New Jersey	Male	35-44 years	287	2094	187	135		341	One or more data cells have counts between 1-9 and have been suppressed in accordance with NCHS confidentiality standards.
2021-03-31	2020-01-01	2021-03-27	By Total			New Jersey	Male	40-49 years	494	2707	324	244		583	One or more data cells have counts between 1-9 and have been suppressed in accordance with NCHS confidentiality standards.
2021-03-31	2020-01-01	2021-03-27	By Total			New Jersey	Male	45-54 years	832	4070	547	418	13	974
2021-03-31	2020-01-01	2021-03-27	By Total			New Jersey	Male	50-64 years	2429	11245	1682	1243	16	2883
2021-03-31	2020-01-01	2021-03-27	By Total			New Jersey	Male	55-64 years	1921	8769	1345	987	11	2289
2021-03-31	2020-01-01	2021-03-27	By Total			New Jersey	Male	65-74 years	2888	12433	2116	1523	17	3496
2021-03-31	2020-01-01	2021-03-27	By Total			New Jersey	Male	75-84 years	3275	14475	2507	1729	21	4071
2021-03-31	2020-01-01	2021-03-27	By Total			New Jersey	Male	85 years and over	2971	15241	2329	1451	24	3873
2021-03-31	2020-01-01	2021-03-27	By Total			New Jersey	Female	All Ages	10181	57068	7289	4858	63	12667
2021-03-31	2020-01-01	2021-03-27	By Total			New Jersey	Female	Under 1 year		182					One or more data cells have counts between 1-9 and have been suppressed in accordance with NCHS confidentiality standards.
2021-03-31	2020-01-01	2021-03-27	By Total			New Jersey	Female	0-17 years		277					One or more data cells have counts between 1-9 and have been suppressed in accordance with NCHS confidentiality standards.
2021-03-31	2020-01-01	2021-03-27	By Total			New Jersey	Female	1-4 years		29	0	0	0		One or more data cells have counts between 1-9 and have been suppressed in accordance with NCHS confidentiality standards.
2021-03-31	2020-01-01	2021-03-27	By Total			New Jersey	Female	5-14 years		39		0	0		One or more data cells have counts between 1-9 and have been suppressed in accordance with NCHS confidentiality standards.
2021-03-31	2020-01-01	2021-03-27	By Total			New Jersey	Female	15-24 years		191			0	13	One or more data cells have counts between 1-9 and have been suppressed in accordance with NCHS confidentiality standards.
2021-03-31	2020-01-01	2021-03-27	By Total			New Jersey	Female	18-29 years	30	397	27	14	0	43
2021-03-31	2020-01-01	2021-03-27	By Total			New Jersey	Female	25-34 years	50	537	42	22		73	One or more data cells have counts between 1-9 and have been suppressed in accordance with NCHS confidentiality standards.
2021-03-31	2020-01-01	2021-03-27	By Total			New Jersey	Female	30-39 years	64	747	46	24		89	One or more data cells have counts between 1-9 and have been suppressed in accordance with NCHS confidentiality standards.
2021-03-31	2020-01-01	2021-03-27	By Total			New Jersey	Female	35-44 years	104	970	74	48		131	One or more data cells have counts between 1-9 and have been suppressed in accordance with NCHS confidentiality standards.
2021-03-31	2020-01-01	2021-03-27	By Total			New Jersey	Female	40-49 years	171	1344	134	86		220	One or more data cells have counts between 1-9 and have been suppressed in accordance with NCHS confidentiality standards.
2021-03-31	2020-01-01	2021-03-27	By Total			New Jersey	Female	45-54 years	324	2115	257	168		414	One or more data cells have counts between 1-9 and have been suppressed in accordance with NCHS confidentiality standards.
2021-03-31	2020-01-01	2021-03-27	By Total			New Jersey	Female	50-64 years	1174	6586	855	607		1429	One or more data cells have counts between 1-9 and have been suppressed in accordance with NCHS confidentiality standards.
2021-03-31	2020-01-01	2021-03-27	By Total			New Jersey	Female	55-64 years	954	5288	681	491		1150	One or more data cells have counts between 1-9 and have been suppressed in accordance with NCHS confidentiality standards.
2021-03-31	2020-01-01	2021-03-27	By Total			New Jersey	Female	65-74 years	1694	8826	1242	868		2073	One or more data cells have counts between 1-9 and have been suppressed in accordance with NCHS confidentiality standards.
2021-03-31	2020-01-01	2021-03-27	By Total			New Jersey	Female	75-84 years	2715	13782	2048	1388	12	3386
2021-03-31	2020-01-01	2021-03-27	By Total			New Jersey	Female	85 years and over	4330	25109	2933	1870	30	5420
2021-03-31	2020-01-01	2021-03-27	By Total			New Mexico	All Sexes	All Ages	3761	27306	3102	1885	62	5038
2021-03-31	2020-01-01	2021-03-27	By Total			New Mexico	All Sexes	Under 1 year	0	92		0	0		One or more data cells have counts between 1-9 and have been suppressed in accordance with NCHS confidentiality standards.
2021-03-31	2020-01-01	2021-03-27	By Total			New Mexico	All Sexes	0-17 years		213					One or more data cells have counts between 1-9 and have been suppressed in accordance with NCHS confidentiality standards.
2021-03-31	2020-01-01	2021-03-27	By Total			New Mexico	All Sexes	1-4 years	0	25		0			One or more data cells have counts between 1-9 and have been suppressed in accordance with NCHS confidentiality standards.
2021-03-31	2020-01-01	2021-03-27	By Total			New Mexico	All Sexes	5-14 years		42					One or more data cells have counts between 1-9 and have been suppressed in accordance with NCHS confidentiality standards.
2021-03-31	2020-01-01	2021-03-27	By Total			New Mexico	All Sexes	15-24 years		351				11	One or more data cells have counts between 1-9 and have been suppressed in accordance with NCHS confidentiality standards.
2021-03-31	2020-01-01	2021-03-27	By Total			New Mexico	All Sexes	18-29 years	33	689	27	14		47	One or more data cells have counts between 1-9 and have been suppressed in accordance with NCHS confidentiality standards.
2021-03-31	2020-01-01	2021-03-27	By Total			New Mexico	All Sexes	25-34 years	73	957	62	38	0	97
2021-03-31	2020-01-01	2021-03-27	By Total			New Mexico	All Sexes	30-39 years	106	1185	93	61		142	One or more data cells have counts between 1-9 and have been suppressed in accordance with NCHS confidentiality standards.
2021-03-31	2020-01-01	2021-03-27	By Total			New Mexico	All Sexes	35-44 years	138	1258	121	85		179	One or more data cells have counts between 1-9 and have been suppressed in accordance with NCHS confidentiality standards.
2021-03-31	2020-01-01	2021-03-27	By Total			New Mexico	All Sexes	40-49 years	186	1427	166	117		238	One or more data cells have counts between 1-9 and have been suppressed in accordance with NCHS confidentiality standards.
2021-03-31	2020-01-01	2021-03-27	By Total			New Mexico	All Sexes	45-54 years	269	1833	236	164	10	351
2021-03-31	2020-01-01	2021-03-27	By Total			New Mexico	All Sexes	50-64 years	743	4705	639	430	19	971
2021-03-31	2020-01-01	2021-03-27	By Total			New Mexico	All Sexes	55-64 years	580	3661	500	331	11	760
2021-03-31	2020-01-01	2021-03-27	By Total			New Mexico	All Sexes	65-74 years	875	5506	756	491	13	1152
2021-03-31	2020-01-01	2021-03-27	By Total			New Mexico	All Sexes	75-84 years	954	6479	774	444	13	1296
2021-03-31	2020-01-01	2021-03-27	By Total			New Mexico	All Sexes	85 years and over	863	7102	644	327		1186	One or more data cells have counts between 1-9 and have been suppressed in accordance with NCHS confidentiality standards.
2021-03-31	2020-01-01	2021-03-27	By Total			New Mexico	Male	All Ages	2079	14792	1761	1081	32	2790
2021-03-31	2020-01-01	2021-03-27	By Total			New Mexico	Male	Under 1 year	0	53		0	0		One or more data cells have counts between 1-9 and have been suppressed in accordance with NCHS confidentiality standards.
2021-03-31	2020-01-01	2021-03-27	By Total			New Mexico	Male	0-17 years		140					One or more data cells have counts between 1-9 and have been suppressed in accordance with NCHS confidentiality standards.
2021-03-31	2020-01-01	2021-03-27	By Total			New Mexico	Male	1-4 years	0	16	0	0	0	0
2021-03-31	2020-01-01	2021-03-27	By Total			New Mexico	Male	5-14 years		31					One or more data cells have counts between 1-9 and have been suppressed in accordance with NCHS confidentiality standards.
2021-03-31	2020-01-01	2021-03-27	By Total			New Mexico	Male	15-24 years		255			0		One or more data cells have counts between 1-9 and have been suppressed in accordance with NCHS confidentiality standards.
2021-03-31	2020-01-01	2021-03-27	By Total			New Mexico	Male	18-29 years	18	500	17		0	26	One or more data cells have counts between 1-9 and have been suppressed in accordance with NCHS confidentiality standards.
2021-03-31	2020-01-01	2021-03-27	By Total			New Mexico	Male	25-34 years	49	647	40	25	0	64
2021-03-31	2020-01-01	2021-03-27	By Total			New Mexico	Male	30-39 years	64	772	52	33		85	One or more data cells have counts between 1-9 and have been suppressed in accordance with NCHS confidentiality standards.
2021-03-31	2020-01-01	2021-03-27	By Total			New Mexico	Male	35-44 years	85	831	70	51		106	One or more data cells have counts between 1-9 and have been suppressed in accordance with NCHS confidentiality standards.
2021-03-31	2020-01-01	2021-03-27	By Total			New Mexico	Male	40-49 years	119	926	102	74		148	One or more data cells have counts between 1-9 and have been suppressed in accordance with NCHS confidentiality standards.
2021-03-31	2020-01-01	2021-03-27	By Total			New Mexico	Male	45-54 years	164	1135	146	99		218	One or more data cells have counts between 1-9 and have been suppressed in accordance with NCHS confidentiality standards.
2021-03-31	2020-01-01	2021-03-27	By Total			New Mexico	Male	50-64 years	455	2934	388	261	10	592
2021-03-31	2020-01-01	2021-03-27	By Total			New Mexico	Male	55-64 years	357	2304	301	201		461	One or more data cells have counts between 1-9 and have been suppressed in accordance with NCHS confidentiality standards.
2021-03-31	2020-01-01	2021-03-27	By Total			New Mexico	Male	65-74 years	513	3152	434	284		671	One or more data cells have counts between 1-9 and have been suppressed in accordance with NCHS confidentiality standards.
2021-03-31	2020-01-01	2021-03-27	By Total			New Mexico	Male	75-84 years	529	3435	438	261		713	One or more data cells have counts between 1-9 and have been suppressed in accordance with NCHS confidentiality standards.
2021-03-31	2020-01-01	2021-03-27	By Total			New Mexico	Male	85 years and over	380	2933	328	158		552	One or more data cells have counts between 1-9 and have been suppressed in accordance with NCHS confidentiality standards.
2021-03-31	2020-01-01	2021-03-27	By Total			New Mexico	Female	All Ages	1682	12514	1341	804	30	2248
2021-03-31	2020-01-01	2021-03-27	By Total			New Mexico	Female	Under 1 year	0	39	0	0	0	0
2021-03-31	2020-01-01	2021-03-27	By Total			New Mexico	Female	0-17 years	0	73		0			One or more data cells have counts between 1-9 and have been suppressed in accordance with NCHS confidentiality standards.
2021-03-31	2020-01-01	2021-03-27	By Total			New Mexico	Female	1-4 years	0			0			One or more data cells have counts between 1-9 and have been suppressed in accordance with NCHS confidentiality standards.
2021-03-31	2020-01-01	2021-03-27	By Total			New Mexico	Female	5-14 years	0	11	0	0	0	0
2021-03-31	2020-01-01	2021-03-27	By Total			New Mexico	Female	15-24 years		96					One or more data cells have counts between 1-9 and have been suppressed in accordance with NCHS confidentiality standards.
2021-03-31	2020-01-01	2021-03-27	By Total			New Mexico	Female	18-29 years	15	189	10			21	One or more data cells have counts between 1-9 and have been suppressed in accordance with NCHS confidentiality standards.
2021-03-31	2020-01-01	2021-03-27	By Total			New Mexico	Female	25-34 years	24	310	22	13	0	33
2021-03-31	2020-01-01	2021-03-27	By Total			New Mexico	Female	30-39 years	42	413	41	28		57	One or more data cells have counts between 1-9 and have been suppressed in accordance with NCHS confidentiality standards.
2021-03-31	2020-01-01	2021-03-27	By Total			New Mexico	Female	35-44 years	53	427	51	34		73	One or more data cells have counts between 1-9 and have been suppressed in accordance with NCHS confidentiality standards.
2021-03-31	2020-01-01	2021-03-27	By Total			New Mexico	Female	40-49 years	67	501	64	43		90	One or more data cells have counts between 1-9 and have been suppressed in accordance with NCHS confidentiality standards.
2021-03-31	2020-01-01	2021-03-27	By Total			New Mexico	Female	45-54 years	105	698	90	65		133	One or more data cells have counts between 1-9 and have been suppressed in accordance with NCHS confidentiality standards.
2021-03-31	2020-01-01	2021-03-27	By Total			New Mexico	Female	50-64 years	288	1771	251	169		379	One or more data cells have counts between 1-9 and have been suppressed in accordance with NCHS confidentiality standards.
2021-03-31	2020-01-01	2021-03-27	By Total			New Mexico	Female	55-64 years	223	1357	199	130		299	One or more data cells have counts between 1-9 and have been suppressed in accordance with NCHS confidentiality standards.
2021-03-31	2020-01-01	2021-03-27	By Total			New Mexico	Female	65-74 years	362	2354	322	207		481	One or more data cells have counts between 1-9 and have been suppressed in accordance with NCHS confidentiality standards.
2021-03-31	2020-01-01	2021-03-27	By Total			New Mexico	Female	75-84 years	425	3044	336	183		583	One or more data cells have counts between 1-9 and have been suppressed in accordance with NCHS confidentiality standards.
2021-03-31	2020-01-01	2021-03-27	By Total			New Mexico	Female	85 years and over	483	4169	316	169		634	One or more data cells have counts between 1-9 and have been suppressed in accordance with NCHS confidentiality standards.
2021-03-31	2020-01-01	2021-03-27	By Total			New York	All Sexes	All Ages	23335	149207	19589	10334	288	32853
2021-03-31	2020-01-01	2021-03-27	By Total			New York	All Sexes	Under 1 year		582		0	0		One or more data cells have counts between 1-9 and have been suppressed in accordance with NCHS confidentiality standards.
2021-03-31	2020-01-01	2021-03-27	By Total			New York	All Sexes	0-17 years		945	11			24	One or more data cells have counts between 1-9 and have been suppressed in accordance with NCHS confidentiality standards.
2021-03-31	2020-01-01	2021-03-27	By Total			New York	All Sexes	1-4 years		86					One or more data cells have counts between 1-9 and have been suppressed in accordance with NCHS confidentiality standards.
2021-03-31	2020-01-01	2021-03-27	By Total			New York	All Sexes	5-14 years		159					One or more data cells have counts between 1-9 and have been suppressed in accordance with NCHS confidentiality standards.
2021-03-31	2020-01-01	2021-03-27	By Total			New York	All Sexes	15-24 years	23	993	34			50	One or more data cells have counts between 1-9 and have been suppressed in accordance with NCHS confidentiality standards.
2021-03-31	2020-01-01	2021-03-27	By Total			New York	All Sexes	18-29 years	65	1928	76	27		117	One or more data cells have counts between 1-9 and have been suppressed in accordance with NCHS confidentiality standards.
2021-03-31	2020-01-01	2021-03-27	By Total			New York	All Sexes	25-34 years	106	2425	109	50		167	One or more data cells have counts between 1-9 and have been suppressed in accordance with NCHS confidentiality standards.
2021-03-31	2020-01-01	2021-03-27	By Total			New York	All Sexes	30-39 years	159	3015	150	71		241	One or more data cells have counts between 1-9 and have been suppressed in accordance with NCHS confidentiality standards.
2021-03-31	2020-01-01	2021-03-27	By Total			New York	All Sexes	35-44 years	278	3487	211	114		380	One or more data cells have counts between 1-9 and have been suppressed in accordance with NCHS confidentiality standards.
2021-03-31	2020-01-01	2021-03-27	By Total			New York	All Sexes	40-49 years	503	4380	376	232		655	One or more data cells have counts between 1-9 and have been suppressed in accordance with NCHS confidentiality standards.
2021-03-31	2020-01-01	2021-03-27	By Total			New York	All Sexes	45-54 years	839	6659	660	401	12	1109
2021-03-31	2020-01-01	2021-03-27	By Total			New York	All Sexes	50-64 years	2926	20894	2494	1432	47	4031
2021-03-31	2020-01-01	2021-03-27	By Total			New York	All Sexes	55-64 years	2408	16771	2082	1188	40	3339
2021-03-31	2020-01-01	2021-03-27	By Total			New York	All Sexes	65-74 years	4510	27397	3838	2179	55	6220
2021-03-31	2020-01-01	2021-03-27	By Total			New York	All Sexes	75-84 years	6277	36294	5316	2880	65	8776
2021-03-31	2020-01-01	2021-03-27	By Total			New York	All Sexes	85 years and over	8888	54354	7328	3511	99	12789
2021-03-31	2020-01-01	2021-03-27	By Total			New York	Male	All Ages	12152	75013	10617	5717	144	17184
2021-03-31	2020-01-01	2021-03-27	By Total			New York	Male	Under 1 year		323		0	0		One or more data cells have counts between 1-9 and have been suppressed in accordance with NCHS confidentiality standards.
2021-03-31	2020-01-01	2021-03-27	By Total			New York	Male	0-17 years		541				14	One or more data cells have counts between 1-9 and have been suppressed in accordance with NCHS confidentiality standards.
2021-03-31	2020-01-01	2021-03-27	By Total			New York	Male	1-4 years		46					One or more data cells have counts between 1-9 and have been suppressed in accordance with NCHS confidentiality standards.
2021-03-31	2020-01-01	2021-03-27	By Total			New York	Male	5-14 years		88					One or more data cells have counts between 1-9 and have been suppressed in accordance with NCHS confidentiality standards.
2021-03-31	2020-01-01	2021-03-27	By Total			New York	Male	15-24 years	18	733	23		0	32	One or more data cells have counts between 1-9 and have been suppressed in accordance with NCHS confidentiality standards.
2021-03-31	2020-01-01	2021-03-27	By Total			New York	Male	18-29 years	48	1406	54	21		82	One or more data cells have counts between 1-9 and have been suppressed in accordance with NCHS confidentiality standards.
2021-03-31	2020-01-01	2021-03-27	By Total			New York	Male	25-34 years	74	1702	74	33		117	One or more data cells have counts between 1-9 and have been suppressed in accordance with NCHS confidentiality standards.
2021-03-31	2020-01-01	2021-03-27	By Total			New York	Male	30-39 years	103	2054	97	46		156	One or more data cells have counts between 1-9 and have been suppressed in accordance with NCHS confidentiality standards.
2021-03-31	2020-01-01	2021-03-27	By Total			New York	Male	35-44 years	188	2331	138	76		252	One or more data cells have counts between 1-9 and have been suppressed in accordance with NCHS confidentiality standards.
2021-03-31	2020-01-01	2021-03-27	By Total			New York	Male	40-49 years	342	2794	234	148		433	One or more data cells have counts between 1-9 and have been suppressed in accordance with NCHS confidentiality standards.
2021-03-31	2020-01-01	2021-03-27	By Total			New York	Male	45-54 years	576	4234	433	275		741	One or more data cells have counts between 1-9 and have been suppressed in accordance with NCHS confidentiality standards.
2021-03-31	2020-01-01	2021-03-27	By Total			New York	Male	50-64 years	1964	12986	1590	967	27	2612
2021-03-31	2020-01-01	2021-03-27	By Total			New York	Male	55-64 years	1601	10324	1307	789	24	2141
2021-03-31	2020-01-01	2021-03-27	By Total			New York	Male	65-74 years	2765	15744	2335	1350	32	3778
2021-03-31	2020-01-01	2021-03-27	By Total			New York	Male	75-84 years	3381	18707	2954	1603	36	4766
2021-03-31	2020-01-01	2021-03-27	By Total			New York	Male	85 years and over	3544	20781	3346	1580	37	5343
2021-03-31	2020-01-01	2021-03-27	By Total			New York	Female	All Ages	11183	74194	8972	4617	144	15669
2021-03-31	2020-01-01	2021-03-27	By Total			New York	Female	Under 1 year	0	259		0	0		One or more data cells have counts between 1-9 and have been suppressed in accordance with NCHS confidentiality standards.
2021-03-31	2020-01-01	2021-03-27	By Total			New York	Female	0-17 years		404		0		10	One or more data cells have counts between 1-9 and have been suppressed in accordance with NCHS confidentiality standards.
2021-03-31	2020-01-01	2021-03-27	By Total			New York	Female	1-4 years	0	40		0			One or more data cells have counts between 1-9 and have been suppressed in accordance with NCHS confidentiality standards.
2021-03-31	2020-01-01	2021-03-27	By Total			New York	Female	5-14 years		71	0	0			One or more data cells have counts between 1-9 and have been suppressed in accordance with NCHS confidentiality standards.
2021-03-31	2020-01-01	2021-03-27	By Total			New York	Female	15-24 years		260	11	0		18	One or more data cells have counts between 1-9 and have been suppressed in accordance with NCHS confidentiality standards.
2021-03-31	2020-01-01	2021-03-27	By Total			New York	Female	18-29 years	17	522	22			35	One or more data cells have counts between 1-9 and have been suppressed in accordance with NCHS confidentiality standards.
2021-03-31	2020-01-01	2021-03-27	By Total			New York	Female	25-34 years	32	723	35	17	0	50
2021-03-31	2020-01-01	2021-03-27	By Total			New York	Female	30-39 years	56	961	53	25		85	One or more data cells have counts between 1-9 and have been suppressed in accordance with NCHS confidentiality standards.
2021-03-31	2020-01-01	2021-03-27	By Total			New York	Female	35-44 years	90	1156	73	38		128	One or more data cells have counts between 1-9 and have been suppressed in accordance with NCHS confidentiality standards.
2021-03-31	2020-01-01	2021-03-27	By Total			New York	Female	40-49 years	161	1586	142	84		222	One or more data cells have counts between 1-9 and have been suppressed in accordance with NCHS confidentiality standards.
2021-03-31	2020-01-01	2021-03-27	By Total			New York	Female	45-54 years	263	2425	227	126		368	One or more data cells have counts between 1-9 and have been suppressed in accordance with NCHS confidentiality standards.
2021-03-31	2020-01-01	2021-03-27	By Total			New York	Female	50-64 years	962	7908	904	465	20	1419
2021-03-31	2020-01-01	2021-03-27	By Total			New York	Female	55-64 years	807	6447	775	399	16	1198
2021-03-31	2020-01-01	2021-03-27	By Total			New York	Female	65-74 years	1745	11653	1503	829	23	2442
2021-03-31	2020-01-01	2021-03-27	By Total			New York	Female	75-84 years	2896	17587	2362	1277	29	4010
2021-03-31	2020-01-01	2021-03-27	By Total			New York	Female	85 years and over	5344	33573	3982	1931	62	7446
2021-03-31	2020-01-01	2021-03-27	By Total			New York City	All Sexes	All Ages	27152	99728	15577	10198	1033	32725
2021-03-31	2020-01-01	2021-03-27	By Total			New York City	All Sexes	Under 1 year		472		0	0		One or more data cells have counts between 1-9 and have been suppressed in accordance with NCHS confidentiality standards.
2021-03-31	2020-01-01	2021-03-27	By Total			New York City	All Sexes	0-17 years	17	725	19			36	One or more data cells have counts between 1-9 and have been suppressed in accordance with NCHS confidentiality standards.
2021-03-31	2020-01-01	2021-03-27	By Total			New York City	All Sexes	1-4 years		53			0		One or more data cells have counts between 1-9 and have been suppressed in accordance with NCHS confidentiality standards.
2021-03-31	2020-01-01	2021-03-27	By Total			New York City	All Sexes	5-14 years	10	126				19	One or more data cells have counts between 1-9 and have been suppressed in accordance with NCHS confidentiality standards.
2021-03-31	2020-01-01	2021-03-27	By Total			New York City	All Sexes	15-24 years	39	697	25	13		51	One or more data cells have counts between 1-9 and have been suppressed in accordance with NCHS confidentiality standards.
2021-03-31	2020-01-01	2021-03-27	By Total			New York City	All Sexes	18-29 years	107	1383	64	33	10	140
2021-03-31	2020-01-01	2021-03-27	By Total			New York City	All Sexes	25-34 years	216	1844	123	72	16	272
2021-03-31	2020-01-01	2021-03-27	By Total			New York City	All Sexes	30-39 years	402	2527	196	120	18	485
2021-03-31	2020-01-01	2021-03-27	By Total			New York City	All Sexes	35-44 years	628	3139	287	187	34	736
2021-03-31	2020-01-01	2021-03-27	By Total			New York City	All Sexes	40-49 years	1023	4061	485	333	73	1186
2021-03-31	2020-01-01	2021-03-27	By Total			New York City	All Sexes	45-54 years	1700	6251	884	611	113	1989
2021-03-31	2020-01-01	2021-03-27	By Total			New York City	All Sexes	50-64 years	5204	17831	2813	1946	294	6119
2021-03-31	2020-01-01	2021-03-27	By Total			New York City	All Sexes	55-64 years	4155	13945	2242	1550	228	4886
2021-03-31	2020-01-01	2021-03-27	By Total			New York City	All Sexes	65-74 years	6592	20345	3547	2501	239	7668
2021-03-31	2020-01-01	2021-03-27	By Total			New York City	All Sexes	75-84 years	7165	23325	4148	2742	210	8610
2021-03-31	2020-01-01	2021-03-27	By Total			New York City	All Sexes	85 years and over	6642	29531	4305	2519	185	8481
2021-03-31	2020-01-01	2021-03-27	By Total			New York City	Male	All Ages	15963	52975	8921	5974	624	18999
2021-03-31	2020-01-01	2021-03-27	By Total			New York City	Male	Under 1 year		260		0	0		One or more data cells have counts between 1-9 and have been suppressed in accordance with NCHS confidentiality standards.
2021-03-31	2020-01-01	2021-03-27	By Total			New York City	Male	0-17 years	10	419	13			24	One or more data cells have counts between 1-9 and have been suppressed in accordance with NCHS confidentiality standards.
2021-03-31	2020-01-01	2021-03-27	By Total			New York City	Male	1-4 years		35			0		One or more data cells have counts between 1-9 and have been suppressed in accordance with NCHS confidentiality standards.
2021-03-31	2020-01-01	2021-03-27	By Total			New York City	Male	5-14 years		72				13	One or more data cells have counts between 1-9 and have been suppressed in accordance with NCHS confidentiality standards.
2021-03-31	2020-01-01	2021-03-27	By Total			New York City	Male	15-24 years	27	506	17			35	One or more data cells have counts between 1-9 and have been suppressed in accordance with NCHS confidentiality standards.
2021-03-31	2020-01-01	2021-03-27	By Total			New York City	Male	18-29 years	73	1012	37	20		90	One or more data cells have counts between 1-9 and have been suppressed in accordance with NCHS confidentiality standards.
2021-03-31	2020-01-01	2021-03-27	By Total			New York City	Male	25-34 years	145	1335	82	49		180	One or more data cells have counts between 1-9 and have been suppressed in accordance with NCHS confidentiality standards.
2021-03-31	2020-01-01	2021-03-27	By Total			New York City	Male	30-39 years	304	1814	148	97	14	361
2021-03-31	2020-01-01	2021-03-27	By Total			New York City	Male	35-44 years	475	2177	196	139	28	539
2021-03-31	2020-01-01	2021-03-27	By Total			New York City	Male	40-49 years	725	2720	327	235	53	825
2021-03-31	2020-01-01	2021-03-27	By Total			New York City	Male	45-54 years	1200	4130	599	433	79	1375
2021-03-31	2020-01-01	2021-03-27	By Total			New York City	Male	50-64 years	3538	11482	1855	1299	203	4122
2021-03-31	2020-01-01	2021-03-27	By Total			New York City	Male	55-64 years	2793	8932	1475	1021	157	3271
2021-03-31	2020-01-01	2021-03-27	By Total			New York City	Male	65-74 years	4228	12131	2224	1581	146	4881
2021-03-31	2020-01-01	2021-03-27	By Total			New York City	Male	75-84 years	4144	12306	2364	1587	115	4937
2021-03-31	2020-01-01	2021-03-27	By Total			New York City	Male	85 years and over	2941	11091	1953	1153	84	3759
2021-03-31	2020-01-01	2021-03-27	By Total			New York City	Female	All Ages	11189	46753	6656	4224	409	13726
2021-03-31	2020-01-01	2021-03-27	By Total			New York City	Female	Under 1 year		212		0	0		One or more data cells have counts between 1-9 and have been suppressed in accordance with NCHS confidentiality standards.
2021-03-31	2020-01-01	2021-03-27	By Total			New York City	Female	0-17 years		306				12	One or more data cells have counts between 1-9 and have been suppressed in accordance with NCHS confidentiality standards.
2021-03-31	2020-01-01	2021-03-27	By Total			New York City	Female	1-4 years		18			0		One or more data cells have counts between 1-9 and have been suppressed in accordance with NCHS confidentiality standards.
2021-03-31	2020-01-01	2021-03-27	By Total			New York City	Female	5-14 years		54		0			One or more data cells have counts between 1-9 and have been suppressed in accordance with NCHS confidentiality standards.
2021-03-31	2020-01-01	2021-03-27	By Total			New York City	Female	15-24 years	12	191				16	One or more data cells have counts between 1-9 and have been suppressed in accordance with NCHS confidentiality standards.
2021-03-31	2020-01-01	2021-03-27	By Total			New York City	Female	18-29 years	34	371	27	13		50	One or more data cells have counts between 1-9 and have been suppressed in accordance with NCHS confidentiality standards.
2021-03-31	2020-01-01	2021-03-27	By Total			New York City	Female	25-34 years	71	509	41	23		92	One or more data cells have counts between 1-9 and have been suppressed in accordance with NCHS confidentiality standards.
2021-03-31	2020-01-01	2021-03-27	By Total			New York City	Female	30-39 years	98	713	48	23		124	One or more data cells have counts between 1-9 and have been suppressed in accordance with NCHS confidentiality standards.
2021-03-31	2020-01-01	2021-03-27	By Total			New York City	Female	35-44 years	153	962	91	48		197	One or more data cells have counts between 1-9 and have been suppressed in accordance with NCHS confidentiality standards.
2021-03-31	2020-01-01	2021-03-27	By Total			New York City	Female	40-49 years	298	1341	158	98	20	361
2021-03-31	2020-01-01	2021-03-27	By Total			New York City	Female	45-54 years	500	2121	285	178	34	614
2021-03-31	2020-01-01	2021-03-27	By Total			New York City	Female	50-64 years	1666	6349	958	647	91	1997
2021-03-31	2020-01-01	2021-03-27	By Total			New York City	Female	55-64 years	1362	5013	767	529	71	1615
2021-03-31	2020-01-01	2021-03-27	By Total			New York City	Female	65-74 years	2364	8214	1323	920	93	2787
2021-03-31	2020-01-01	2021-03-27	By Total			New York City	Female	75-84 years	3021	11019	1784	1155	95	3673
2021-03-31	2020-01-01	2021-03-27	By Total			New York City	Female	85 years and over	3701	18440	2352	1366	101	4722
2021-03-31	2020-01-01	2021-03-27	By Total			North Carolina	All Sexes	All Ages	6378	99087	7923	2867	285	11716
2021-03-31	2020-01-01	2021-03-27	By Total			North Carolina	All Sexes	Under 1 year	0	742		0			One or more data cells have counts between 1-9 and have been suppressed in accordance with NCHS confidentiality standards.
2021-03-31	2020-01-01	2021-03-27	By Total			North Carolina	All Sexes	0-17 years		1215	15	0		25	One or more data cells have counts between 1-9 and have been suppressed in accordance with NCHS confidentiality standards.
2021-03-31	2020-01-01	2021-03-27	By Total			North Carolina	All Sexes	1-4 years	0	108		0			One or more data cells have counts between 1-9 and have been suppressed in accordance with NCHS confidentiality standards.
2021-03-31	2020-01-01	2021-03-27	By Total			North Carolina	All Sexes	5-14 years		190		0			One or more data cells have counts between 1-9 and have been suppressed in accordance with NCHS confidentiality standards.
2021-03-31	2020-01-01	2021-03-27	By Total			North Carolina	All Sexes	15-24 years		1337	11			21	One or more data cells have counts between 1-9 and have been suppressed in accordance with NCHS confidentiality standards.
2021-03-31	2020-01-01	2021-03-27	By Total			North Carolina	All Sexes	18-29 years	20	2320	33			53	One or more data cells have counts between 1-9 and have been suppressed in accordance with NCHS confidentiality standards.
2021-03-31	2020-01-01	2021-03-27	By Total			North Carolina	All Sexes	25-34 years	40	2562	61	17		91	One or more data cells have counts between 1-9 and have been suppressed in accordance with NCHS confidentiality standards.
2021-03-31	2020-01-01	2021-03-27	By Total			North Carolina	All Sexes	30-39 years	67	2930	80	27	10	130
2021-03-31	2020-01-01	2021-03-27	By Total			North Carolina	All Sexes	35-44 years	111	3311	124	41		203	One or more data cells have counts between 1-9 and have been suppressed in accordance with NCHS confidentiality standards.
2021-03-31	2020-01-01	2021-03-27	By Total			North Carolina	All Sexes	40-49 years	184	4282	211	73	13	335
2021-03-31	2020-01-01	2021-03-27	By Total			North Carolina	All Sexes	45-54 years	300	6139	348	132	26	542
2021-03-31	2020-01-01	2021-03-27	By Total			North Carolina	All Sexes	50-64 years	882	16963	1196	430	77	1725
2021-03-31	2020-01-01	2021-03-27	By Total			North Carolina	All Sexes	55-64 years	694	13321	977	344	61	1388
2021-03-31	2020-01-01	2021-03-27	By Total			North Carolina	All Sexes	65-74 years	1448	20364	1880	735	67	2658
2021-03-31	2020-01-01	2021-03-27	By Total			North Carolina	All Sexes	75-84 years	1825	24596	2278	826	51	3328
2021-03-31	2020-01-01	2021-03-27	By Total			North Carolina	All Sexes	85 years and over	1951	26417	2230	770	52	3462
2021-03-31	2020-01-01	2021-03-27	By Total			North Carolina	Male	All Ages	3265	51116	4180	1549	136	6029
2021-03-31	2020-01-01	2021-03-27	By Total			North Carolina	Male	Under 1 year	0	415		0			One or more data cells have counts between 1-9 and have been suppressed in accordance with NCHS confidentiality standards.
2021-03-31	2020-01-01	2021-03-27	By Total			North Carolina	Male	0-17 years		717		0		15	One or more data cells have counts between 1-9 and have been suppressed in accordance with NCHS confidentiality standards.
2021-03-31	2020-01-01	2021-03-27	By Total			North Carolina	Male	1-4 years	0	65		0			One or more data cells have counts between 1-9 and have been suppressed in accordance with NCHS confidentiality standards.
2021-03-31	2020-01-01	2021-03-27	By Total			North Carolina	Male	5-14 years		109		0	0		One or more data cells have counts between 1-9 and have been suppressed in accordance with NCHS confidentiality standards.
2021-03-31	2020-01-01	2021-03-27	By Total			North Carolina	Male	15-24 years		977				12	One or more data cells have counts between 1-9 and have been suppressed in accordance with NCHS confidentiality standards.
2021-03-31	2020-01-01	2021-03-27	By Total			North Carolina	Male	18-29 years	11	1663	17			26	One or more data cells have counts between 1-9 and have been suppressed in accordance with NCHS confidentiality standards.
2021-03-31	2020-01-01	2021-03-27	By Total			North Carolina	Male	25-34 years	24	1803	30		0	47	One or more data cells have counts between 1-9 and have been suppressed in accordance with NCHS confidentiality standards.
2021-03-31	2020-01-01	2021-03-27	By Total			North Carolina	Male	30-39 years	44	1970	43	13		79	One or more data cells have counts between 1-9 and have been suppressed in accordance with NCHS confidentiality standards.
2021-03-31	2020-01-01	2021-03-27	By Total			North Carolina	Male	35-44 years	79	2124	67	29		123	One or more data cells have counts between 1-9 and have been suppressed in accordance with NCHS confidentiality standards.
2021-03-31	2020-01-01	2021-03-27	By Total			North Carolina	Male	40-49 years	128	2678	119	55		198	One or more data cells have counts between 1-9 and have been suppressed in accordance with NCHS confidentiality standards.
2021-03-31	2020-01-01	2021-03-27	By Total			North Carolina	Male	45-54 years	196	3772	204	86	12	326
2021-03-31	2020-01-01	2021-03-27	By Total			North Carolina	Male	50-64 years	551	10299	693	260	44	1028
2021-03-31	2020-01-01	2021-03-27	By Total			North Carolina	Male	55-64 years	430	8062	565	208	37	824
2021-03-31	2020-01-01	2021-03-27	By Total			North Carolina	Male	65-74 years	831	11673	1084	420	28	1521
2021-03-31	2020-01-01	2021-03-27	By Total			North Carolina	Male	75-84 years	963	12398	1258	459	25	1787
2021-03-31	2020-01-01	2021-03-27	By Total			North Carolina	Male	85 years and over	736	9718	957	339	22	1375
2021-03-31	2020-01-01	2021-03-27	By Total			North Carolina	Female	All Ages	3113	47971	3743	1318	149	5687
2021-03-31	2020-01-01	2021-03-27	By Total			North Carolina	Female	Under 1 year	0	327		0	0		One or more data cells have counts between 1-9 and have been suppressed in accordance with NCHS confidentiality standards.
2021-03-31	2020-01-01	2021-03-27	By Total			North Carolina	Female	0-17 years	0	498		0		10	One or more data cells have counts between 1-9 and have been suppressed in accordance with NCHS confidentiality standards.
2021-03-31	2020-01-01	2021-03-27	By Total			North Carolina	Female	1-4 years	0	43		0			One or more data cells have counts between 1-9 and have been suppressed in accordance with NCHS confidentiality standards.
2021-03-31	2020-01-01	2021-03-27	By Total			North Carolina	Female	5-14 years	0	81		0			One or more data cells have counts between 1-9 and have been suppressed in accordance with NCHS confidentiality standards.
2021-03-31	2020-01-01	2021-03-27	By Total			North Carolina	Female	15-24 years		360					One or more data cells have counts between 1-9 and have been suppressed in accordance with NCHS confidentiality standards.
2021-03-31	2020-01-01	2021-03-27	By Total			North Carolina	Female	18-29 years		657	16			27	One or more data cells have counts between 1-9 and have been suppressed in accordance with NCHS confidentiality standards.
2021-03-31	2020-01-01	2021-03-27	By Total			North Carolina	Female	25-34 years	16	759	31	10		44	One or more data cells have counts between 1-9 and have been suppressed in accordance with NCHS confidentiality standards.
2021-03-31	2020-01-01	2021-03-27	By Total			North Carolina	Female	30-39 years	23	960	37	14		51	One or more data cells have counts between 1-9 and have been suppressed in accordance with NCHS confidentiality standards.
2021-03-31	2020-01-01	2021-03-27	By Total			North Carolina	Female	35-44 years	32	1187	57	12		80	One or more data cells have counts between 1-9 and have been suppressed in accordance with NCHS confidentiality standards.
2021-03-31	2020-01-01	2021-03-27	By Total			North Carolina	Female	40-49 years	56	1604	92	18		137	One or more data cells have counts between 1-9 and have been suppressed in accordance with NCHS confidentiality standards.
2021-03-31	2020-01-01	2021-03-27	By Total			North Carolina	Female	45-54 years	104	2367	144	46	14	216
2021-03-31	2020-01-01	2021-03-27	By Total			North Carolina	Female	50-64 years	331	6664	503	170	33	697
2021-03-31	2020-01-01	2021-03-27	By Total			North Carolina	Female	55-64 years	264	5259	412	136	24	564
2021-03-31	2020-01-01	2021-03-27	By Total			North Carolina	Female	65-74 years	617	8691	796	315	39	1137
2021-03-31	2020-01-01	2021-03-27	By Total			North Carolina	Female	75-84 years	862	12198	1020	367	26	1541
2021-03-31	2020-01-01	2021-03-27	By Total			North Carolina	Female	85 years and over	1215	16699	1273	431	30	2087
2021-03-31	2020-01-01	2021-03-27	By Total			North Dakota	All Sexes	All Ages	1635	9949	1407	824	32	2249
2021-03-31	2020-01-01	2021-03-27	By Total			North Dakota	All Sexes	Under 1 year	0	58		0	0		One or more data cells have counts between 1-9 and have been suppressed in accordance with NCHS confidentiality standards.
2021-03-31	2020-01-01	2021-03-27	By Total			North Dakota	All Sexes	0-17 years		112		0	0		One or more data cells have counts between 1-9 and have been suppressed in accordance with NCHS confidentiality standards.
2021-03-31	2020-01-01	2021-03-27	By Total			North Dakota	All Sexes	1-4 years	0	13	0	0	0	0
2021-03-31	2020-01-01	2021-03-27	By Total			North Dakota	All Sexes	5-14 years	0	23	0	0	0	0
2021-03-31	2020-01-01	2021-03-27	By Total			North Dakota	All Sexes	15-24 years		114		0	0		One or more data cells have counts between 1-9 and have been suppressed in accordance with NCHS confidentiality standards.
2021-03-31	2020-01-01	2021-03-27	By Total			North Dakota	All Sexes	18-29 years		188			0		One or more data cells have counts between 1-9 and have been suppressed in accordance with NCHS confidentiality standards.
2021-03-31	2020-01-01	2021-03-27	By Total			North Dakota	All Sexes	25-34 years		226			0	12	One or more data cells have counts between 1-9 and have been suppressed in accordance with NCHS confidentiality standards.
2021-03-31	2020-01-01	2021-03-27	By Total			North Dakota	All Sexes	30-39 years	13	281	21			27	One or more data cells have counts between 1-9 and have been suppressed in accordance with NCHS confidentiality standards.
2021-03-31	2020-01-01	2021-03-27	By Total			North Dakota	All Sexes	35-44 years	19	298	31	15		37	One or more data cells have counts between 1-9 and have been suppressed in accordance with NCHS confidentiality standards.
2021-03-31	2020-01-01	2021-03-27	By Total			North Dakota	All Sexes	40-49 years	30	348	33	19		46	One or more data cells have counts between 1-9 and have been suppressed in accordance with NCHS confidentiality standards.
2021-03-31	2020-01-01	2021-03-27	By Total			North Dakota	All Sexes	45-54 years	46	455	54	26		76	One or more data cells have counts between 1-9 and have been suppressed in accordance with NCHS confidentiality standards.
2021-03-31	2020-01-01	2021-03-27	By Total			North Dakota	All Sexes	50-64 years	164	1395	174	93		248	One or more data cells have counts between 1-9 and have been suppressed in accordance with NCHS confidentiality standards.
2021-03-31	2020-01-01	2021-03-27	By Total			North Dakota	All Sexes	55-64 years	136	1137	136	76		198	One or more data cells have counts between 1-9 and have been suppressed in accordance with NCHS confidentiality standards.
2021-03-31	2020-01-01	2021-03-27	By Total			North Dakota	All Sexes	65-74 years	276	1751	298	163		419	One or more data cells have counts between 1-9 and have been suppressed in accordance with NCHS confidentiality standards.
2021-03-31	2020-01-01	2021-03-27	By Total			North Dakota	All Sexes	75-84 years	436	2368	392	241		596	One or more data cells have counts between 1-9 and have been suppressed in accordance with NCHS confidentiality standards.
2021-03-31	2020-01-01	2021-03-27	By Total			North Dakota	All Sexes	85 years and over	711	3506	484	299		904	One or more data cells have counts between 1-9 and have been suppressed in accordance with NCHS confidentiality standards.
2021-03-31	2020-01-01	2021-03-27	By Total			North Dakota	Male	All Ages	909	5323	831	500	14	1253
2021-03-31	2020-01-01	2021-03-27	By Total			North Dakota	Male	Under 1 year	0	35		0	0		One or more data cells have counts between 1-9 and have been suppressed in accordance with NCHS confidentiality standards.
2021-03-31	2020-01-01	2021-03-27	By Total			North Dakota	Male	0-17 years		68		0	0		One or more data cells have counts between 1-9 and have been suppressed in accordance with NCHS confidentiality standards.
2021-03-31	2020-01-01	2021-03-27	By Total			North Dakota	Male	1-4 years	0		0	0	0	0	One or more data cells have counts between 1-9 and have been suppressed in accordance with NCHS confidentiality standards.
2021-03-31	2020-01-01	2021-03-27	By Total			North Dakota	Male	5-14 years	0	15	0	0	0	0
2021-03-31	2020-01-01	2021-03-27	By Total			North Dakota	Male	15-24 years		76		0	0		One or more data cells have counts between 1-9 and have been suppressed in accordance with NCHS confidentiality standards.
2021-03-31	2020-01-01	2021-03-27	By Total			North Dakota	Male	18-29 years		135			0		One or more data cells have counts between 1-9 and have been suppressed in accordance with NCHS confidentiality standards.
2021-03-31	2020-01-01	2021-03-27	By Total			North Dakota	Male	25-34 years		169			0		One or more data cells have counts between 1-9 and have been suppressed in accordance with NCHS confidentiality standards.
2021-03-31	2020-01-01	2021-03-27	By Total			North Dakota	Male	30-39 years	11	209	15			21	One or more data cells have counts between 1-9 and have been suppressed in accordance with NCHS confidentiality standards.
2021-03-31	2020-01-01	2021-03-27	By Total			North Dakota	Male	35-44 years	16	214	24	14		28	One or more data cells have counts between 1-9 and have been suppressed in accordance with NCHS confidentiality standards.
2021-03-31	2020-01-01	2021-03-27	By Total			North Dakota	Male	40-49 years	21	233	24	15		31	One or more data cells have counts between 1-9 and have been suppressed in accordance with NCHS confidentiality standards.
2021-03-31	2020-01-01	2021-03-27	By Total			North Dakota	Male	45-54 years	32	294	40	19	0	53
2021-03-31	2020-01-01	2021-03-27	By Total			North Dakota	Male	50-64 years	113	874	119	65		168	One or more data cells have counts between 1-9 and have been suppressed in accordance with NCHS confidentiality standards.
2021-03-31	2020-01-01	2021-03-27	By Total			North Dakota	Male	55-64 years	93	708	90	52		132	One or more data cells have counts between 1-9 and have been suppressed in accordance with NCHS confidentiality standards.
2021-03-31	2020-01-01	2021-03-27	By Total			North Dakota	Male	65-74 years	181	1076	186	108		263	One or more data cells have counts between 1-9 and have been suppressed in accordance with NCHS confidentiality standards.
2021-03-31	2020-01-01	2021-03-27	By Total			North Dakota	Male	75-84 years	242	1292	234	143		335	One or more data cells have counts between 1-9 and have been suppressed in accordance with NCHS confidentiality standards.
2021-03-31	2020-01-01	2021-03-27	By Total			North Dakota	Male	85 years and over	338	1436	249	162		429	One or more data cells have counts between 1-9 and have been suppressed in accordance with NCHS confidentiality standards.
2021-03-31	2020-01-01	2021-03-27	By Total			North Dakota	Female	All Ages	726	4626	576	324	18	996
2021-03-31	2020-01-01	2021-03-27	By Total			North Dakota	Female	Under 1 year	0	23	0	0	0	0
2021-03-31	2020-01-01	2021-03-27	By Total			North Dakota	Female	0-17 years		44	0	0	0		One or more data cells have counts between 1-9 and have been suppressed in accordance with NCHS confidentiality standards.
2021-03-31	2020-01-01	2021-03-27	By Total			North Dakota	Female	1-4 years	0		0	0	0	0	One or more data cells have counts between 1-9 and have been suppressed in accordance with NCHS confidentiality standards.
2021-03-31	2020-01-01	2021-03-27	By Total			North Dakota	Female	5-14 years	0		0	0	0	0	One or more data cells have counts between 1-9 and have been suppressed in accordance with NCHS confidentiality standards.
2021-03-31	2020-01-01	2021-03-27	By Total			North Dakota	Female	15-24 years		38		0	0		One or more data cells have counts between 1-9 and have been suppressed in accordance with NCHS confidentiality standards.
2021-03-31	2020-01-01	2021-03-27	By Total			North Dakota	Female	18-29 years		53		0	0		One or more data cells have counts between 1-9 and have been suppressed in accordance with NCHS confidentiality standards.
2021-03-31	2020-01-01	2021-03-27	By Total			North Dakota	Female	25-34 years		57			0		One or more data cells have counts between 1-9 and have been suppressed in accordance with NCHS confidentiality standards.
2021-03-31	2020-01-01	2021-03-27	By Total			North Dakota	Female	30-39 years		72			0		One or more data cells have counts between 1-9 and have been suppressed in accordance with NCHS confidentiality standards.
2021-03-31	2020-01-01	2021-03-27	By Total			North Dakota	Female	35-44 years		84			0		One or more data cells have counts between 1-9 and have been suppressed in accordance with NCHS confidentiality standards.
2021-03-31	2020-01-01	2021-03-27	By Total			North Dakota	Female	40-49 years		115				15	One or more data cells have counts between 1-9 and have been suppressed in accordance with NCHS confidentiality standards.
2021-03-31	2020-01-01	2021-03-27	By Total			North Dakota	Female	45-54 years	14	161	14			23	One or more data cells have counts between 1-9 and have been suppressed in accordance with NCHS confidentiality standards.
2021-03-31	2020-01-01	2021-03-27	By Total			North Dakota	Female	50-64 years	51	521	55	28		80	One or more data cells have counts between 1-9 and have been suppressed in accordance with NCHS confidentiality standards.
2021-03-31	2020-01-01	2021-03-27	By Total			North Dakota	Female	55-64 years	43	429	46	24		66	One or more data cells have counts between 1-9 and have been suppressed in accordance with NCHS confidentiality standards.
2021-03-31	2020-01-01	2021-03-27	By Total			North Dakota	Female	65-74 years	95	675	112	55		156	One or more data cells have counts between 1-9 and have been suppressed in accordance with NCHS confidentiality standards.
2021-03-31	2020-01-01	2021-03-27	By Total			North Dakota	Female	75-84 years	194	1076	158	98		261	One or more data cells have counts between 1-9 and have been suppressed in accordance with NCHS confidentiality standards.
2021-03-31	2020-01-01	2021-03-27	By Total			North Dakota	Female	85 years and over	373	2070	235	137		475	One or more data cells have counts between 1-9 and have been suppressed in accordance with NCHS confidentiality standards.
2021-03-31	2020-01-01	2021-03-27	By Total			Ohio	All Sexes	All Ages	20838	173851	16654	9531	323	28281
2021-03-31	2020-01-01	2021-03-27	By Total			Ohio	All Sexes	Under 1 year		1034	16	0	0	18	One or more data cells have counts between 1-9 and have been suppressed in accordance with NCHS confidentiality standards.
2021-03-31	2020-01-01	2021-03-27	By Total			Ohio	All Sexes	0-17 years		1652	30	0		43	One or more data cells have counts between 1-9 and have been suppressed in accordance with NCHS confidentiality standards.
2021-03-31	2020-01-01	2021-03-27	By Total			Ohio	All Sexes	1-4 years		171		0			One or more data cells have counts between 1-9 and have been suppressed in accordance with NCHS confidentiality standards.
2021-03-31	2020-01-01	2021-03-27	By Total			Ohio	All Sexes	5-14 years		254		0		11	One or more data cells have counts between 1-9 and have been suppressed in accordance with NCHS confidentiality standards.
2021-03-31	2020-01-01	2021-03-27	By Total			Ohio	All Sexes	15-24 years	13	1583	24			35	One or more data cells have counts between 1-9 and have been suppressed in accordance with NCHS confidentiality standards.
2021-03-31	2020-01-01	2021-03-27	By Total			Ohio	All Sexes	18-29 years	28	3059	58	14	11	83
2021-03-31	2020-01-01	2021-03-27	By Total			Ohio	All Sexes	25-34 years	59	3794	93	22	17	147
2021-03-31	2020-01-01	2021-03-27	By Total			Ohio	All Sexes	30-39 years	110	4448	139	47	13	215
2021-03-31	2020-01-01	2021-03-27	By Total			Ohio	All Sexes	35-44 years	176	5092	203	80	12	311
2021-03-31	2020-01-01	2021-03-27	By Total			Ohio	All Sexes	40-49 years	286	6496	331	121	21	517
2021-03-31	2020-01-01	2021-03-27	By Total			Ohio	All Sexes	45-54 years	522	9288	575	233	27	891
2021-03-31	2020-01-01	2021-03-27	By Total			Ohio	All Sexes	50-64 years	2186	27746	2279	1108	68	3424
2021-03-31	2020-01-01	2021-03-27	By Total			Ohio	All Sexes	55-64 years	1841	22185	1915	950	55	2860
2021-03-31	2020-01-01	2021-03-27	By Total			Ohio	All Sexes	65-74 years	4264	34892	3845	2224	74	5959
2021-03-31	2020-01-01	2021-03-27	By Total			Ohio	All Sexes	75-84 years	6362	42726	4967	3044	69	8352
2021-03-31	2020-01-01	2021-03-27	By Total			Ohio	All Sexes	85 years and over	7595	52832	5005	2973	61	9688
2021-03-31	2020-01-01	2021-03-27	By Total			Ohio	Male	All Ages	10895	89155	9277	5429	158	14899
2021-03-31	2020-01-01	2021-03-27	By Total			Ohio	Male	Under 1 year	0	551		0	0		One or more data cells have counts between 1-9 and have been suppressed in accordance with NCHS confidentiality standards.
2021-03-31	2020-01-01	2021-03-27	By Total			Ohio	Male	0-17 years		941	17	0		22	One or more data cells have counts between 1-9 and have been suppressed in accordance with NCHS confidentiality standards.
2021-03-31	2020-01-01	2021-03-27	By Total			Ohio	Male	1-4 years		103		0			One or more data cells have counts between 1-9 and have been suppressed in accordance with NCHS confidentiality standards.
2021-03-31	2020-01-01	2021-03-27	By Total			Ohio	Male	5-14 years	0	152		0			One or more data cells have counts between 1-9 and have been suppressed in accordance with NCHS confidentiality standards.
2021-03-31	2020-01-01	2021-03-27	By Total			Ohio	Male	15-24 years		1135	16			20	One or more data cells have counts between 1-9 and have been suppressed in accordance with NCHS confidentiality standards.
2021-03-31	2020-01-01	2021-03-27	By Total			Ohio	Male	18-29 years	12	2143	31			43	One or more data cells have counts between 1-9 and have been suppressed in accordance with NCHS confidentiality standards.
2021-03-31	2020-01-01	2021-03-27	By Total			Ohio	Male	25-34 years	32	2565	50	11		79	One or more data cells have counts between 1-9 and have been suppressed in accordance with NCHS confidentiality standards.
2021-03-31	2020-01-01	2021-03-27	By Total			Ohio	Male	30-39 years	64	2946	94	31		131	One or more data cells have counts between 1-9 and have been suppressed in accordance with NCHS confidentiality standards.
2021-03-31	2020-01-01	2021-03-27	By Total			Ohio	Male	35-44 years	103	3295	127	47		187	One or more data cells have counts between 1-9 and have been suppressed in accordance with NCHS confidentiality standards.
2021-03-31	2020-01-01	2021-03-27	By Total			Ohio	Male	40-49 years	166	4083	196	69	11	304
2021-03-31	2020-01-01	2021-03-27	By Total			Ohio	Male	45-54 years	325	5639	339	150	15	529
2021-03-31	2020-01-01	2021-03-27	By Total			Ohio	Male	50-64 years	1357	16846	1351	676	40	2071
2021-03-31	2020-01-01	2021-03-27	By Total			Ohio	Male	55-64 years	1135	13519	1141	572	33	1736
2021-03-31	2020-01-01	2021-03-27	By Total			Ohio	Male	65-74 years	2627	20133	2365	1393	43	3642
2021-03-31	2020-01-01	2021-03-27	By Total			Ohio	Male	75-84 years	3503	21766	2856	1821	30	4567
2021-03-31	2020-01-01	2021-03-27	By Total			Ohio	Male	85 years and over	3165	20297	2367	1433	20	4119
2021-03-31	2020-01-01	2021-03-27	By Total			Ohio	Female	All Ages	9943	84696	7377	4102	165	13382
2021-03-31	2020-01-01	2021-03-27	By Total			Ohio	Female	Under 1 year		483		0	0	11	One or more data cells have counts between 1-9 and have been suppressed in accordance with NCHS confidentiality standards.
2021-03-31	2020-01-01	2021-03-27	By Total			Ohio	Female	0-17 years		711	13	0		21	One or more data cells have counts between 1-9 and have been suppressed in accordance with NCHS confidentiality standards.
2021-03-31	2020-01-01	2021-03-27	By Total			Ohio	Female	1-4 years		68		0	0		One or more data cells have counts between 1-9 and have been suppressed in accordance with NCHS confidentiality standards.
2021-03-31	2020-01-01	2021-03-27	By Total			Ohio	Female	5-14 years		102	0	0			One or more data cells have counts between 1-9 and have been suppressed in accordance with NCHS confidentiality standards.
2021-03-31	2020-01-01	2021-03-27	By Total			Ohio	Female	15-24 years		448				15	One or more data cells have counts between 1-9 and have been suppressed in accordance with NCHS confidentiality standards.
2021-03-31	2020-01-01	2021-03-27	By Total			Ohio	Female	18-29 years	16	916	27			40	One or more data cells have counts between 1-9 and have been suppressed in accordance with NCHS confidentiality standards.
2021-03-31	2020-01-01	2021-03-27	By Total			Ohio	Female	25-34 years	27	1229	43	11		68	One or more data cells have counts between 1-9 and have been suppressed in accordance with NCHS confidentiality standards.
2021-03-31	2020-01-01	2021-03-27	By Total			Ohio	Female	30-39 years	46	1502	45	16		84	One or more data cells have counts between 1-9 and have been suppressed in accordance with NCHS confidentiality standards.
2021-03-31	2020-01-01	2021-03-27	By Total			Ohio	Female	35-44 years	73	1797	76	33		124	One or more data cells have counts between 1-9 and have been suppressed in accordance with NCHS confidentiality standards.
2021-03-31	2020-01-01	2021-03-27	By Total			Ohio	Female	40-49 years	120	2413	135	52	10	213
2021-03-31	2020-01-01	2021-03-27	By Total			Ohio	Female	45-54 years	197	3649	236	83	12	362
2021-03-31	2020-01-01	2021-03-27	By Total			Ohio	Female	50-64 years	829	10900	928	432	28	1353
2021-03-31	2020-01-01	2021-03-27	By Total			Ohio	Female	55-64 years	706	8666	774	378	22	1124
2021-03-31	2020-01-01	2021-03-27	By Total			Ohio	Female	65-74 years	1637	14759	1480	831	31	2317
2021-03-31	2020-01-01	2021-03-27	By Total			Ohio	Female	75-84 years	2859	20960	2111	1223	39	3785
2021-03-31	2020-01-01	2021-03-27	By Total			Ohio	Female	85 years and over	4430	32535	2638	1540	41	5569
2021-03-31	2020-01-01	2021-03-27	By Total			Oklahoma	All Sexes	All Ages	7873	56728	6809	3202	153	11618
2021-03-31	2020-01-01	2021-03-27	By Total			Oklahoma	All Sexes	Under 1 year		296		0			One or more data cells have counts between 1-9 and have been suppressed in accordance with NCHS confidentiality standards.
2021-03-31	2020-01-01	2021-03-27	By Total			Oklahoma	All Sexes	0-17 years		575	13	0		22	One or more data cells have counts between 1-9 and have been suppressed in accordance with NCHS confidentiality standards.
2021-03-31	2020-01-01	2021-03-27	By Total			Oklahoma	All Sexes	1-4 years		71		0			One or more data cells have counts between 1-9 and have been suppressed in accordance with NCHS confidentiality standards.
2021-03-31	2020-01-01	2021-03-27	By Total			Oklahoma	All Sexes	5-14 years		120		0			One or more data cells have counts between 1-9 and have been suppressed in accordance with NCHS confidentiality standards.
2021-03-31	2020-01-01	2021-03-27	By Total			Oklahoma	All Sexes	15-24 years		569	17			20	One or more data cells have counts between 1-9 and have been suppressed in accordance with NCHS confidentiality standards.
2021-03-31	2020-01-01	2021-03-27	By Total			Oklahoma	All Sexes	18-29 years	26	922	40	10		58	One or more data cells have counts between 1-9 and have been suppressed in accordance with NCHS confidentiality standards.
2021-03-31	2020-01-01	2021-03-27	By Total			Oklahoma	All Sexes	25-34 years	47	1064	59	20		90	One or more data cells have counts between 1-9 and have been suppressed in accordance with NCHS confidentiality standards.
2021-03-31	2020-01-01	2021-03-27	By Total			Oklahoma	All Sexes	30-39 years	76	1416	80	25		138	One or more data cells have counts between 1-9 and have been suppressed in accordance with NCHS confidentiality standards.
2021-03-31	2020-01-01	2021-03-27	By Total			Oklahoma	All Sexes	35-44 years	121	1771	122	36		213	One or more data cells have counts between 1-9 and have been suppressed in accordance with NCHS confidentiality standards.
2021-03-31	2020-01-01	2021-03-27	By Total			Oklahoma	All Sexes	40-49 years	225	2339	200	83		346	One or more data cells have counts between 1-9 and have been suppressed in accordance with NCHS confidentiality standards.
2021-03-31	2020-01-01	2021-03-27	By Total			Oklahoma	All Sexes	45-54 years	366	3342	325	158	13	545
2021-03-31	2020-01-01	2021-03-27	By Total			Oklahoma	All Sexes	50-64 years	1178	10038	1133	505	43	1845
2021-03-31	2020-01-01	2021-03-27	By Total			Oklahoma	All Sexes	55-64 years	965	8057	932	405	32	1521
2021-03-31	2020-01-01	2021-03-27	By Total			Oklahoma	All Sexes	65-74 years	1910	12544	1724	820	36	2846
2021-03-31	2020-01-01	2021-03-27	By Total			Oklahoma	All Sexes	75-84 years	2260	14331	1965	954	33	3300
2021-03-31	2020-01-01	2021-03-27	By Total			Oklahoma	All Sexes	85 years and over	2193	14563	1654	805	24	3063
2021-03-31	2020-01-01	2021-03-27	By Total			Oklahoma	Male	All Ages	4295	29823	3786	1844	70	6300
2021-03-31	2020-01-01	2021-03-27	By Total			Oklahoma	Male	Under 1 year		169		0	0		One or more data cells have counts between 1-9 and have been suppressed in accordance with NCHS confidentiality standards.
2021-03-31	2020-01-01	2021-03-27	By Total			Oklahoma	Male	0-17 years		338		0		13	One or more data cells have counts between 1-9 and have been suppressed in accordance with NCHS confidentiality standards.
2021-03-31	2020-01-01	2021-03-27	By Total			Oklahoma	Male	1-4 years		44		0	0		One or more data cells have counts between 1-9 and have been suppressed in accordance with NCHS confidentiality standards.
2021-03-31	2020-01-01	2021-03-27	By Total			Oklahoma	Male	5-14 years	0	65		0			One or more data cells have counts between 1-9 and have been suppressed in accordance with NCHS confidentiality standards.
2021-03-31	2020-01-01	2021-03-27	By Total			Oklahoma	Male	15-24 years		400	10		0	11	One or more data cells have counts between 1-9 and have been suppressed in accordance with NCHS confidentiality standards.
2021-03-31	2020-01-01	2021-03-27	By Total			Oklahoma	Male	18-29 years	21	653	22			37	One or more data cells have counts between 1-9 and have been suppressed in accordance with NCHS confidentiality standards.
2021-03-31	2020-01-01	2021-03-27	By Total			Oklahoma	Male	25-34 years	31	734	35	11		56	One or more data cells have counts between 1-9 and have been suppressed in accordance with NCHS confidentiality standards.
2021-03-31	2020-01-01	2021-03-27	By Total			Oklahoma	Male	30-39 years	48	933	54	18	0	84
2021-03-31	2020-01-01	2021-03-27	By Total			Oklahoma	Male	35-44 years	68	1129	78	24		123	One or more data cells have counts between 1-9 and have been suppressed in accordance with NCHS confidentiality standards.
2021-03-31	2020-01-01	2021-03-27	By Total			Oklahoma	Male	40-49 years	127	1462	121	50		201	One or more data cells have counts between 1-9 and have been suppressed in accordance with NCHS confidentiality standards.
2021-03-31	2020-01-01	2021-03-27	By Total			Oklahoma	Male	45-54 years	217	2054	194	99	12	323
2021-03-31	2020-01-01	2021-03-27	By Total			Oklahoma	Male	50-64 years	706	6065	631	292	25	1068
2021-03-31	2020-01-01	2021-03-27	By Total			Oklahoma	Male	55-64 years	581	4856	512	229	15	878
2021-03-31	2020-01-01	2021-03-27	By Total			Oklahoma	Male	65-74 years	1123	7094	982	497	16	1621
2021-03-31	2020-01-01	2021-03-27	By Total			Oklahoma	Male	75-84 years	1263	7424	1131	556	16	1853
2021-03-31	2020-01-01	2021-03-27	By Total			Oklahoma	Male	85 years and over	1005	5854	836	424		1423	One or more data cells have counts between 1-9 and have been suppressed in accordance with NCHS confidentiality standards.
2021-03-31	2020-01-01	2021-03-27	By Total			Oklahoma	Female	All Ages	3578	26905	3023	1358	83	5318
2021-03-31	2020-01-01	2021-03-27	By Total			Oklahoma	Female	Under 1 year		127		0			One or more data cells have counts between 1-9 and have been suppressed in accordance with NCHS confidentiality standards.
2021-03-31	2020-01-01	2021-03-27	By Total			Oklahoma	Female	0-17 years		237		0			One or more data cells have counts between 1-9 and have been suppressed in accordance with NCHS confidentiality standards.
2021-03-31	2020-01-01	2021-03-27	By Total			Oklahoma	Female	1-4 years	0	27		0			One or more data cells have counts between 1-9 and have been suppressed in accordance with NCHS confidentiality standards.
2021-03-31	2020-01-01	2021-03-27	By Total			Oklahoma	Female	5-14 years		55		0	0		One or more data cells have counts between 1-9 and have been suppressed in accordance with NCHS confidentiality standards.
2021-03-31	2020-01-01	2021-03-27	By Total			Oklahoma	Female	15-24 years		169		0			One or more data cells have counts between 1-9 and have been suppressed in accordance with NCHS confidentiality standards.
2021-03-31	2020-01-01	2021-03-27	By Total			Oklahoma	Female	18-29 years		269	18			21	One or more data cells have counts between 1-9 and have been suppressed in accordance with NCHS confidentiality standards.
2021-03-31	2020-01-01	2021-03-27	By Total			Oklahoma	Female	25-34 years	16	330	24			34	One or more data cells have counts between 1-9 and have been suppressed in accordance with NCHS confidentiality standards.
2021-03-31	2020-01-01	2021-03-27	By Total			Oklahoma	Female	30-39 years	28	483	26			54	One or more data cells have counts between 1-9 and have been suppressed in accordance with NCHS confidentiality standards.
2021-03-31	2020-01-01	2021-03-27	By Total			Oklahoma	Female	35-44 years	53	642	44	12		90	One or more data cells have counts between 1-9 and have been suppressed in accordance with NCHS confidentiality standards.
2021-03-31	2020-01-01	2021-03-27	By Total			Oklahoma	Female	40-49 years	98	877	79	33		145	One or more data cells have counts between 1-9 and have been suppressed in accordance with NCHS confidentiality standards.
2021-03-31	2020-01-01	2021-03-27	By Total			Oklahoma	Female	45-54 years	149	1288	131	59		222	One or more data cells have counts between 1-9 and have been suppressed in accordance with NCHS confidentiality standards.
2021-03-31	2020-01-01	2021-03-27	By Total			Oklahoma	Female	50-64 years	472	3973	502	213	18	777
2021-03-31	2020-01-01	2021-03-27	By Total			Oklahoma	Female	55-64 years	384	3201	420	176	17	643
2021-03-31	2020-01-01	2021-03-27	By Total			Oklahoma	Female	65-74 years	787	5450	742	323	20	1225
2021-03-31	2020-01-01	2021-03-27	By Total			Oklahoma	Female	75-84 years	997	6907	834	398	17	1447
2021-03-31	2020-01-01	2021-03-27	By Total			Oklahoma	Female	85 years and over	1188	8709	818	381	17	1640
2021-03-31	2020-01-01	2021-03-27	By Total			Oregon	All Sexes	All Ages	2202	48312	2577	769	95	4103
2021-03-31	2020-01-01	2021-03-27	By Total			Oregon	All Sexes	Under 1 year	0	222	0	0	0	0
2021-03-31	2020-01-01	2021-03-27	By Total			Oregon	All Sexes	0-17 years	0	393		0			One or more data cells have counts between 1-9 and have been suppressed in accordance with NCHS confidentiality standards.
2021-03-31	2020-01-01	2021-03-27	By Total			Oregon	All Sexes	1-4 years	0	29	0	0	0	0
2021-03-31	2020-01-01	2021-03-27	By Total			Oregon	All Sexes	5-14 years	0	65		0			One or more data cells have counts between 1-9 and have been suppressed in accordance with NCHS confidentiality standards.
2021-03-31	2020-01-01	2021-03-27	By Total			Oregon	All Sexes	15-24 years		473					One or more data cells have counts between 1-9 and have been suppressed in accordance with NCHS confidentiality standards.
2021-03-31	2020-01-01	2021-03-27	By Total			Oregon	All Sexes	18-29 years		802			0	11	One or more data cells have counts between 1-9 and have been suppressed in accordance with NCHS confidentiality standards.
2021-03-31	2020-01-01	2021-03-27	By Total			Oregon	All Sexes	25-34 years	10	903	17			27	One or more data cells have counts between 1-9 and have been suppressed in accordance with NCHS confidentiality standards.
2021-03-31	2020-01-01	2021-03-27	By Total			Oregon	All Sexes	30-39 years	17	1055	29			49	One or more data cells have counts between 1-9 and have been suppressed in accordance with NCHS confidentiality standards.
2021-03-31	2020-01-01	2021-03-27	By Total			Oregon	All Sexes	35-44 years	29	1249	37	10		61	One or more data cells have counts between 1-9 and have been suppressed in accordance with NCHS confidentiality standards.
[truncated: 47,573 more rows]
