# Supplementary material
Source: MDPI journal article supplement (https://www.mdpi.com/2076-3417/11/16/7403)
Supplement: s1 [file s1 › Supplementary Files/File S2.xlsx]

## Sheet: Alabama
Age

## Sheet: Alaska
Age

## Sheet: Arizona
Age

## Sheet: Arkansas
Age

## Sheet: California
Age

## Sheet: Colorado
Age

## Sheet: Connecticut
Age

## Sheet: Delaware
Age

## Sheet: District of Columbia
Age

## Sheet: Florida
Age

[truncated: 41 more sheets: Georgia, Hawaii, Idaho, Illinois, Indiana, Iowa, Kansas, Kentucky, Louisiana, Maine, Maryland, Massachusetts, Michigan, Minnesota, Mississippi, Missouri, Montana, Nebraska, Nevada, New Hampshire …]
