# Supplementary material
Source: MDPI journal article supplement (https://www.mdpi.com/2076-3417/11/16/7403)
Supplement: s1 [file s1 › Supplementary Files/Table S2.pdf]

| State | Age-Adjusted Mortality Rate (per 10,000) |             |             | Age-Adjusted YPLL Rate (per 10,000) |               |             |
|-------|------------------------------------------|-------------|-------------|-------------------------------------|---------------|-------------|
|       | Male                                     | Female      | Ratio       | Male                                | Female        | Ratio       |
| US    | 20.7 – 20.7                              | 12.7 – 12.7 | 1.62 – 1.62 | 117.1 – 117.4                       | 62.3 – 62.5   | 1.87 – 1.88 |
| AL    | 25.2 – 25.2                              | 16.2 – 16.2 | 1.55 – 1.56 | 148.4 – 152.3                       | 100.1 – 103.1 | 1.44 – 1.51 |
| AK    | 7.79 – 8.07                              | 4.86 – 4.94 | 1.58 – 1.69 | 30.6 – 36.7                         | 27.0 – 39.1   | 0.80 – 1.34 |
| AZ    | 25.6 – 25.6                              | 15.2 – 15.2 | 1.68 – 1.68 | 194.7 – 197.9                       | 108.8 – 110.6 | 1.77 – 1.81 |
| AR    | 22.3 – 22.3                              | 15.6 – 15.6 | 1.43 – 1.43 | 118.5 – 121.4                       | 78.5 – 81.7   | 1.46 – 1.54 |
| CA    | 21.9 – 21.9                              | 12.0 – 12.0 | 1.82 – 1.82 | 155.8 – 157.1                       | 69.4 – 70.2   | 2.22 – 2.26 |
| CO    | 16.2 – 16.2                              | 10.0 – 10.1 | 1.61 – 1.61 | 71.5 – 73.7                         | 31.9 – 33.1   | 2.17 – 2.30 |
| CT    | 22.5 – 22.5                              | 15.8 – 15.8 | 1.42 – 1.43 | 92.8 – 95.5                         | 50.2 – 54.8   | 1.71 – 1.89 |
| DE    | 13.9 – 13.9                              | 10.6 – 10.6 | 1.30 – 1.32 | 75.6 – 90.1                         | 53.1 – 61.4   | 1.24 – 1.68 |
| DC    | 32.5 – 32.8                              | 17.4 – 17.6 | 1.85 – 1.89 | 262.9 – 289.3                       | 119.0 – 140.6 | 1.88 – 2.45 |
| FL    | 14.7 – 14.7                              | 8.78 – 8.79 | 1.67 – 1.67 | 91.1 – 92.1                         | 49.4 – 50.4   | 1.81 – 1.86 |
| GA    | 22.7 – 22.7                              | 14.4 – 14.4 | 1.57 – 1.58 | 122.6 – 124.9                       | 76.9 – 78.1   | 1.57 – 1.62 |
| HI    | 3.83 – 3.85                              | 1.86 – 1.89 | 2.00 – 2.10 | 30.1 – 35.8                         | 16.0 – 23.6   | 1.29 – 2.22 |
| ID    | 15.3 – 15.4                              | 8.96 – 8.99 | 1.70 – 1.72 | 54.3 – 58.3                         | 32.4 – 34.6   | 1.59 – 1.78 |
| IL    | 20.9 – 20.9                              | 12.3 – 12.3 | 1.70 – 1.70 | 111.6 – 113.4                       | 55.3 – 56.3   | 1.99 – 2.05 |
| IN    | 22.6 – 22.6                              | 14.8 – 14.8 | 1.52 – 1.53 | 86.6 – 89.1                         | 53.3 – 55.3   | 1.57 – 1.67 |
| IA    | 20.8 – 20.9                              | 13.4 – 13.4 | 1.56 – 1.57 | 78.7 – 81.2                         | 50.0 – 53.0   | 1.50 – 1.61 |
| KA    | 20.4 – 20.4                              | 12.5 – 12.5 | 1.63 – 1.63 | 91.7 – 94.4                         | 54.6 – 58.2   | 1.59 – 1.71 |
| KY    | 18.3 – 18.3                              | 13.0 – 13.0 | 1.40 – 1.41 | 77.9 – 81.3                         | 49.6 – 51.3   | 1.53 – 1.62 |
| LA    | 25.8 – 25.8                              | 16.3 – 16.3 | 1.58 – 1.59 | 147.0 – 150.7                       | 95.0 – 98.2   | 1.50 – 1.58 |
| ME    | 5.60 – 5.63                              | 4.35 – 4.37 | 1.28 – 1.30 | 21.3 – 24.4                         | 10.1 – 13.0   | 1.67 – 2.35 |
| MD    | 19.4 – 19.4                              | 12.7 – 12.7 | 1.53 – 1.53 | 104.9 – 108.0                       | 55.5 – 56.9   | 1.85 – 1.94 |
| MA    | 21.5 – 21.6                              | 14.3 – 14.3 | 1.51 – 1.51 | 73.9 – 76.6                         | 37.5 – 39.1   | 1.90 – 2.04 |
| MI    | 17.6 – 17.6                              | 11.2 – 11.2 | 1.57 – 1.57 | 87.3 – 88.7                         | 50.2 – 51.7   | 1.70 – 1.76 |
| MN    | 14.7 – 14.7                              | 9.72 – 9.73 | 1.51 – 1.52 | 50.1 – 51.5                         | 29.4 – 31.7   | 1.59 – 1.74 |
| MS    | 30.5 – 30.5                              | 20.2 – 20.2 | 1.51 – 1.51 | 176.5 – 181.8                       | 135.7 – 138.8 | 1.28 – 1.33 |
| MO    | 19.9 – 19.9                              | 13.0 – 13.0 | 1.53 – 1.53 | 86.6 – 89.3                         | 51.9 – 54.1   | 1.61 – 1.71 |
| MT    | 16.1 – 16.1                              | 10.6 – 10.6 | 1.51 – 1.52 | 78.2 – 82.3                         | 51.9 – 55.4   | 1.43 – 1.56 |
| NE    | 18.7 – 18.8                              | 10.4 – 10.5 | 1.79 – 1.80 | 84.6 – 88.5                         | 44.2 – 47.4   | 1.80 – 1.99 |
| NV    | 24.8 – 24.8                              | 13.2 – 13.3 | 1.86 – 1.88 | 166.2 – 170.9                       | 77.3 – 80.5   | 2.07 – 2.20 |
| NH    | 10.1 – 10.1                              | 6.89 – 6.91 | 1.45 – 1.47 | 26.7 – 30.9                         | 8.16 – 9.61   | 2.81 – 3.76 |
| NJ    | 31.4 – 31.5                              | 18.3 – 18.3 | 1.73 – 1.73 | 191.5 – 193.7                       | 84.4 – 86.8   | 2.21 – 2.29 |
| NM    | 21.2 – 21.2                              | 14.1 – 14.1 | 1.50 – 1.51 | 183.9 – 188.9                       | 112.7 – 115.8 | 1.59 – 1.67 |
| NY    | 32.5 – 32.5                              | 18.2 – 18.2 | 1.78 – 1.79 | 204.9 – 207.4                       | 90.3 – 92.0   | 2.24 – 2.31 |
| NC    | 7.54 – 7.55                              | 5.19 – 5.20 | 1.45 – 1.45 | 41.2 – 42.5                         | 22.2 – 22.9   | 1.81 – 1.90 |
| ND    | 27.5 – 27.5                              | 15.8 – 15.8 | 1.73 – 1.77 | 116.8 – 126.7                       | 55.1 – 63.9   | 1.85 – 2.27 |
| OH    | 21.1 – 21.1                              | 13.5 – 13.5 | 1.56 – 1.57 | 79.4 – 81.3                         | 48.9 – 50.7   | 1.58 – 1.66 |
| OK    | 25.9 – 25.9                              | 16.5 – 16.6 | 1.56 – 1.57 | 138.3 – 142.4                       | 89.1 – 92.0   | 1.51 – 1.59 |
| OR    | 6.16 – 6.18                              | 4.14 – 4.15 | 1.48 – 1.49 | 30.6 – 32.6                         | 14.7 – 15.6   | 1.98 – 2.20 |
| PA    | 21.1 – 21.1                              | 13.8 – 13.9 | 1.52 – 1.53 | 89.0 – 90.3                         | 47.6 – 48.6   | 1.84 – 1.89 |
| RI    | 25.5 – 25.5                              | 17.6 – 17.6 | 1.45 – 1.46 | 94.8 – 99.8                         | 50.0 – 60.0   | 1.61 – 1.96 |
| SC    | 19.3 – 19.4                              | 12.4 – 12.4 | 1.55 – 1.56 | 101.0 – 104.5                       | 62.7 – 64.8   | 1.57 – 1.66 |
| SD    | 26.9 – 27.0                              | 17.1 – 17.2 | 1.56 – 1.59 | 111.5 – 116.9                       | 79.4 – 88.9   | 1.27 – 1.45 |
| TN    | 22.6 – 22.6                              | 13.9 – 13.9 | 1.62 – 1.63 | 118.2 – 121.2                       | 73.6 – 75.8   | 1.57 – 1.64 |
| TX    | 28.4 – 28.5                              | 16.5 – 16.5 | 1.73 – 1.73 | 184.1 – 185.8                       | 97.8 – 99.1   | 1.86 – 1.90 |
| UT    | 13.4 – 13.4                              | 7.55 – 7.57 | 1.77 – 1.78 | 71.9 – 75.2                         | 38.7 – 40.4   | 1.79 – 1.94 |
| VT    | 3.49 – 3.61                              | 2.52 – 2.59 | 1.35 – 1.43 | 11.1 – 20.7                         | 5.42 – 11.5   | 1.01 – 3.73 |
| VA    | 14.8 – 14.8                              | 10.1 – 10.1 | 1.46 – 1.46 | 66.6 – 68.5                         | 38.6 – 39.7   | 1.69 – 1.77 |
| WA    | 8.65 – 8.68                              | 5.53 – 5.54 | 1.56 – 1.57 | 38.7 – 39.8                         | 20.8 – 22.4   | 1.74 – 1.90 |
| WV    | 14.3 – 14.4                              | 9.91 – 9.95 | 1.44 – 1.45 | 58.7 – 64.4                         | 43.9 – 46.5   | 1.28 – 1.46 |
| WI    | 15.8 – 15.9                              | 9.99 – 10.0 | 1.58 – 1.59 | 59.7 – 62.1                         | 34.8 – 36.0   | 1.67 – 1.78 |
| WY    | 12.2 – 12.3                              | 9.67 – 9.74 | 1.24 – 1.27 | 55.0 – 63.8                         | 41.2 – 52.3   | 1.07 – 1.52 |

**Table S2:** Conservative 95% interval estimates of age-adjusted mortality and YPLL rates by sex and age-adjusted male-to-female mortality and YPLL rate ratios in the U.S. and in each state and D.C. Quantities calculated with respect to cumulative COVID-19 deaths according to data from the National Center for Health Statistics as of 31 March 2021. The upper reference age used to define YPLL is 75 years.
